# Supplementary material for: The Rhythms of Scholarly Publication: Suggestions to Enhance Bibliometric Comparisons Across Disciplines
Source: Front Res Metr Anal. 2022 Jan 25;7:812312. doi: 10.3389/frma.2022.812312 (PMC8821823; doi:10.3389/frma.2022.812312)
Supplement: Supplementary file 1 [file Table_1.XLSX]

## Sheet: Table 1
Supplemental Table 1. Totals and percent of the overall literature represented by each publishing modality in each discipline (10-year total: 2010-2019).
Broad Field	Discipline	# Journal Articles	% Journal Articles	# Conference Proceedings	% Conference Proceedings	# Books	% Books	# Chapters	% Chapters
Agricultural Sciences	Agricultural Economics	9357	0.853897	130	0.0118635	382	0.0348604	1089	0.0993794
Agricultural Sciences	Agriculture, various	3679	0.875327	170	0.0404473	73	0.0173685	281	0.066857
Agricultural Sciences	Agronomy and Crop Science	19224	0.927083	594	0.0286458	152	0.00733025	766	0.0369406
Agricultural Sciences	Animal Sciences	31162	0.943388	326	0.00986922	247	0.0074776	1297	0.039265
Agricultural Sciences	Food Science	24644	0.925179	264	0.00991103	369	0.0138529	1360	0.0510568
Agricultural Sciences	Horticulture	11372	0.869751	999	0.0764054	164	0.012543	540	0.0413002
Agricultural Sciences	Plant Sciences	23077	0.915028	671	0.0266059	345	0.0136796	1127	0.0446868
Agricultural Sciences	Soil Science	18976	0.917025	600	0.0289953	262	0.0126613	855	0.0413183
Biological and Biomedical Sciences	Anatomy	24228	0.914851	658	0.0248461	291	0.0109882	1306	0.0493147
Biological and Biomedical Sciences	Biochemistry	130299	0.933641	2745	0.019669	1368	0.00980224	5148	0.0368874
Biological and Biomedical Sciences	Bioinformatics and Computational Biology	30075	0.89913	2101	0.062812	241	0.007205	1032	0.0308529
Biological and Biomedical Sciences	Biological Sciences, various	7092	0.907718	265	0.0339178	107	0.0136951	349	0.0446691
Biological and Biomedical Sciences	Biology/Biological Sciences, General	140792	0.924979	3021	0.0198474	1868	0.0122724	6530	0.042901
Biological and Biomedical Sciences	Biomedical Sciences, General	32239	0.937017	639	0.0185723	245	0.00712085	1283	0.03729
Biological and Biomedical Sciences	Biomedical Sciences, various	21293	0.907089	818	0.0348471	253	0.0107779	1110	0.0472864
Biological and Biomedical Sciences	Biophysics	36223	0.936455	896	0.0231638	288	0.00744552	1274	0.0329361
Biological and Biomedical Sciences	Botany/Plant Biology	13215	0.918091	266	0.0184799	202	0.0140336	711	0.0493956
Biological and Biomedical Sciences	Cell Biology	79711	0.928719	1697	0.0197719	722	0.00841208	3699	0.0430973
Biological and Biomedical Sciences	Cognitive Science	19611	0.834049	1440	0.0612427	494	0.0210097	1968	0.0836984
Biological and Biomedical Sciences	Developmental Biology	22915	0.931921	424	0.0172435	182	0.00740168	1068	0.0434341
Biological and Biomedical Sciences	Ecology	32370	0.924646	625	0.0178531	506	0.0144538	1507	0.0430473
Biological and Biomedical Sciences	Entomology	18867	0.91663	546	0.0265267	266	0.0129233	904	0.0439197
Biological and Biomedical Sciences	Epidemiology	108039	0.954197	1944	0.0171694	600	0.00529918	2642	0.0233341
Biological and Biomedical Sciences	Evolutionary Biology	28275	0.914043	424	0.0137066	563	0.0182	1672	0.0540506
Biological and Biomedical Sciences	Genetics	37529	0.932398	861	0.0213913	335	0.00832298	1525	0.0378882
Biological and Biomedical Sciences	Human and Medical Genetics	25462	0.93928	445	0.0164158	234	0.00863214	967	0.0356721
Biological and Biomedical Sciences	Immunology	70736	0.9301	1251	0.0164493	581	0.00763951	3484	0.0458108
Biological and Biomedical Sciences	Microbiology	87640	0.932212	1351	0.0143704	809	0.00860519	4213	0.044813
Biological and Biomedical Sciences	Molecular Biology	76775	0.928816	1434	0.0173484	799	0.00966622	3651	0.0441694
Biological and Biomedical Sciences	Molecular Genetics	27346	0.93792	461	0.0158115	227	0.0077857	1122	0.0384826
Biological and Biomedical Sciences	Molecular Pharmacology	15750	0.931126	287	0.0169672	136	0.0080402	742	0.0438664
Biological and Biomedical Sciences	Neurobiology/Neuroscience	72785	0.907351	1684	0.0209931	940	0.0117182	4808	0.0599374
Biological and Biomedical Sciences	Oncology and Cancer Biology	21051	0.940617	541	0.0241734	103	0.00460232	685	0.0306077
Biological and Biomedical Sciences	Oral Biology and Craniofacial Science	5356	0.931802	64	0.0111343	46	0.00800278	282	0.0490605
Biological and Biomedical Sciences	Pathology	105726	0.9199	2164	0.0188285	1004	0.0087356	6038	0.0525354
Biological and Biomedical Sciences	Pharmaceutical Sciences	50107	0.936492	779	0.0145594	412	0.00770021	2207	0.0412485
Biological and Biomedical Sciences	Pharmacology	73291	0.932978	1567	0.0199476	564	0.00717959	3134	0.0398951
Biological and Biomedical Sciences	Physiology, General	68020	0.930812	1522	0.0208276	601	0.00822431	2933	0.0401363
Biological and Biomedical Sciences	Plant Pathology	16387	0.926238	382	0.0215917	184	0.0104002	739	0.0417703
Biological and Biomedical Sciences	Structural Biology	5679	0.943826	127	0.0211069	45	0.00747881	166	0.0275885
Biological and Biomedical Sciences	Toxicology	16087	0.929508	398	0.0229965	140	0.00808921	682	0.039406
Biological and Biomedical Sciences	Zoology	5101	0.940276	87	0.0160369	58	0.0106912	179	0.0329954
Business	Accounting	11394	0.829137	243	0.017683	1412	0.102751	693	0.0504293
Business	Business Administration	23834	0.718844	3623	0.109271	1528	0.0460852	4171	0.125799
Business	Business, various	25677	0.727044	3417	0.0967523	1988	0.0562902	4235	0.119914
Business	Finance	18570	0.864525	237	0.0110335	1013	0.0471601	1660	0.0772812
Business	Management	33866	0.643791	8794	0.167174	2925	0.0556041	7019	0.133431
Business	Management Information Systems	12499	0.729187	2599	0.151625	777	0.0453299	1266	0.073858
Business	Marketing	13771	0.683153	2174	0.107848	963	0.0477726	3250	0.161226
Education	Counselor Education	10061	0.715627	153	0.0108827	880	0.0625934	2965	0.210897
Education	Curriculum and Instruction	15722	0.591987	878	0.0330597	2872	0.108141	7086	0.266812
Education	Education, General	21732	0.64502	984	0.0292057	2940	0.0872611	8036	0.238514
Education	Educational Evaluation and Research	4195	0.699867	109	0.0181849	414	0.0690691	1276	0.21288
Education	Educational Leadership and Administration	16707	0.59781	568	0.0203242	3083	0.110316	7589	0.27155
Education	Foundations of Education	3559	0.630135	111	0.019653	526	0.0931303	1452	0.257082
Education	Higher Education/Higher Education Administration	3495	0.642581	57	0.0104799	477	0.0876999	1410	0.259239
Education	Mathematics Education	1448	0.638167	152	0.0669899	196	0.0863817	473	0.208462
Education	Science Education	1069	0.602593	129	0.072717	149	0.083991	427	0.240699
Education	Special Education	8790	0.743718	158	0.0133683	710	0.0600728	2161	0.182841
Education	Teacher Education Specific Levels	6433	0.592248	531	0.048886	1233	0.113515	2665	0.245351
Education	Teacher Education Specific Subject Areas	8377	0.633853	630	0.0476695	1102	0.0833838	3107	0.235094
Engineering	Aerospace Engineering	45795	0.580941	30043	0.381116	931	0.0118104	2060	0.0261325
Engineering	Agricultural/Biological Engineering and Bioengineering	83635	0.864847	8726	0.0902332	873	0.00902745	3471	0.0358927
Engineering	Biomedical Engineering	75039	0.787985	15510	0.162871	828	0.00869483	3852	0.0404499
Engineering	Chemical Engineering	94029	0.904395	5757	0.0553723	1001	0.00962787	3182	0.0306053
Engineering	Civil Engineering	84491	0.789724	17386	0.162504	1607	0.0150204	3504	0.0327513
Engineering	Computer Engineering	109328	0.434119	131697	0.522941	3648	0.0144854	7166	0.0284547
Engineering	Electrical Engineering	134242	0.45119	151126	0.507937	4366	0.0146742	7795	0.0261991
Engineering	Engineering Mechanics	10571	0.687009	4265	0.277182	169	0.0109833	382	0.0248262
Engineering	Engineering, General	12557	0.640435	6028	0.307441	293	0.0149436	729	0.0371806
Engineering	Engineering, various	31685	0.62521	16670	0.328933	701	0.0138322	1623	0.0320251
Engineering	Environmental Engineering	80993	0.819651	13381	0.135416	1379	0.0139555	3061	0.0309774
Engineering	Geological and Mining Engineering	7541	0.736642	2301	0.224773	123	0.0120152	272	0.0265703
Engineering	Industrial Engineering	24665	0.686015	8969	0.249458	922	0.0256439	1398	0.038883
Engineering	Materials Engineering	19365	0.826152	3295	0.140572	249	0.0106229	531	0.0226536
Engineering	Materials Science and Engineering	88736	0.86876	10175	0.0996172	960	0.00939877	2270	0.0222242
Engineering	Mechanical Engineering	132623	0.672623	57047	0.289325	2256	0.0114417	5247	0.0266111
Engineering	Nuclear Engineering	10482	0.785169	2434	0.182322	108	0.00808989	326	0.0244195
Engineering	Operations Research	11681	0.752593	2592	0.167	520	0.033503	728	0.0469042
Engineering	Systems Engineering	18446	0.60285	10045	0.328289	804	0.0262762	1303	0.0425845
Family, Consumer and Human Sciences	Architecture	8712	0.571729	2037	0.133679	1951	0.128035	2538	0.166557
Family, Consumer and Human Sciences	Architecture, Design, Planning, various	6976	0.638068	1371	0.1254	1001	0.0915577	1585	0.144974
Family, Consumer and Human Sciences	Communication and Communication Studies	21428	0.632972	1253	0.037013	3290	0.0971849	7882	0.23283
Family, Consumer and Human Sciences	Consumer and Human Sciences, various	6157	0.871973	190	0.0269084	190	0.0269084	524	0.0742105
Family, Consumer and Human Sciences	Family and Human Sciences, various	9819	0.818659	197	0.0164249	472	0.039353	1506	0.125563
Family, Consumer and Human Sciences	Health Promotion, Kinesiology, Exercise Science and Rehab	77938	0.915808	1559	0.018319	1215	0.0142768	4391	0.0515963
Family, Consumer and Human Sciences	Health, Physical Education, Recreation	17544	0.902701	214	0.0110111	429	0.0220736	1248	0.064214
Family, Consumer and Human Sciences	Human Development and Family Studies, General	27546	0.825818	488	0.0146301	1123	0.0336671	4199	0.125884
Family, Consumer and Human Sciences	Mass Communications/Media Studies	13357	0.556379	1945	0.081018	2943	0.122589	5762	0.240013
Family, Consumer and Human Sciences	Nutrition Sciences	44017	0.939049	461	0.00983488	537	0.0114562	1859	0.0396595
Family, Consumer and Human Sciences	Urban and Regional Planning	10280	0.700034	335	0.0228124	1342	0.0913858	2728	0.185768
Health Professions Sciences	Communication Disorders and Sciences	11967	0.868306	386	0.0280075	418	0.0303294	1011	0.0733566
Health Professions Sciences	Environmental Health Sciences	28637	0.923298	1058	0.0341114	254	0.00818932	1067	0.0344016
Health Professions Sciences	Health Professions, various	57835	0.917055	1321	0.0209463	997	0.0158088	2913	0.0461897
Health Professions Sciences	Medical Sciences, various	8886	0.911198	489	0.0501436	81	0.00830599	296	0.0303527
Health Professions Sciences	Nursing	51989	0.890894	743	0.0127322	1192	0.0204263	4432	0.0759476
Health Professions Sciences	Pharmacy	31291	0.920134	565	0.0166142	337	0.00990972	1814	0.053342
Health Professions Sciences	Public Health	123905	0.933526	1729	0.0130266	1470	0.0110753	5624	0.0423724
Health Professions Sciences	Speech and Hearing Sciences	9136	0.879392	337	0.0324382	224	0.0215613	692	0.0666089
Health Professions Sciences	Veterinary Medical Sciences	49651	0.893598	623	0.0112125	609	0.0109605	4680	0.0842287
Humanities	American Studies	1790	0.42397	34	0.00805306	889	0.210564	1509	0.357414
Humanities	Ancient Studies	707	0.362936	7	0.00359343	594	0.304928	640	0.328542
Humanities	Area and Ethnic Studies, various	8911	0.47955	54	0.00290604	3286	0.176838	6331	0.340706
Humanities	Art History and Criticism	4525	0.377366	226	0.0188475	3305	0.275623	3935	0.328163
Humanities	Asian Languages	2447	0.425491	26	0.00452095	1316	0.22883	1962	0.341158
Humanities	Asian Studies	3535	0.445046	42	0.00528767	1723	0.216921	2643	0.332746
Humanities	Classics and Classical Languages	4401	0.393579	48	0.00429261	2656	0.237525	4077	0.364604
Humanities	Comparative Literature	3685	0.368832	12	0.00120108	2462	0.246422	3832	0.383545
Humanities	Composition, Rhetoric and Writing	1994	0.285673	146	0.0209169	1637	0.234527	3203	0.458883
Humanities	English Language and Literature	24124	0.37159	539	0.0083024	15828	0.243804	24430	0.376304
Humanities	French Language and Literature	2879	0.513832	18	0.00321256	1229	0.219347	1477	0.263609
Humanities	Gender Studies	3854	0.497997	25	0.00323039	1117	0.144334	2743	0.354439
Humanities	Germanic Languages and Literatures	2751	0.464225	6	0.00101249	1427	0.240803	1742	0.293959
Humanities	History	34424	0.522939	140	0.00212675	14097	0.214149	17167	0.260786
Humanities	Humanities/Humanistic Studies, General	6363	0.608434	189	0.0180723	1336	0.127749	2570	0.245745
Humanities	Italian Language and Literature	2357	0.51128	13	0.00281996	997	0.216269	1243	0.269631
Humanities	Languages, various	9490	0.526842	87	0.00482985	3696	0.205185	4740	0.263143
Humanities	Linguistics	9188	0.574609	1405	0.0878674	1381	0.0863665	4016	0.251157
Humanities	Music specialties	511	0.497566	21	0.0204479	216	0.210321	279	0.271665
Humanities	Music, General	4902	0.468374	342	0.0326772	2271	0.216988	2951	0.281961
Humanities	Near and Middle Eastern Languages and Cultures	2527	0.399273	26	0.00410807	1493	0.235898	2283	0.36072
Humanities	Performing and Visual Arts, various	8544	0.417636	1028	0.0502493	4409	0.215515	6477	0.3166
Humanities	Philosophy	22596	0.490439	406	0.0088121	6657	0.144488	16414	0.356261
Humanities	Religion/Religious Studies	8011	0.422387	12	0.000632711	4052	0.213645	6891	0.363334
Humanities	Slavic Languages and Literatures	2345	0.492751	35	0.00735449	1099	0.230931	1280	0.268964
Humanities	Spanish Language and Literature	4360	0.528421	34	0.00412071	1768	0.214277	2089	0.253181
Humanities	Theatre Literature, History and Criticism	1497	0.425889	43	0.0122333	777	0.221053	1198	0.340825
Humanities	Theology/Theological Studies	5894	0.346685	8	0.000470561	4661	0.27416	6438	0.378684
Natural Resources and Conservation	Environmental Sciences	62576	0.875446	4103	0.0574015	1210	0.016928	3590	0.0502245
Natural Resources and Conservation	Fisheries Science	13210	0.948722	99	0.00711003	143	0.01027	472	0.0338983
Natural Resources and Conservation	Forest Resources/Forestry	20108	0.927234	350	0.0161394	275	0.012681	953	0.0439454
Natural Resources and Conservation	Natural Resources	31133	0.894447	874	0.0251099	644	0.018502	2156	0.0619416
Natural Resources and Conservation	Wildlife Science	13750	0.938502	88	0.00600642	174	0.0118763	639	0.0436148
Physical and Mathematical Sciences	Applied Mathematics	14953	0.772087	3184	0.164403	402	0.020757	828	0.0427531
Physical and Mathematical Sciences	Applied Physics	19764	0.6753	8779	0.299962	271	0.00925958	453	0.0154782
Physical and Mathematical Sciences	Astronomy and Astrophysics	87379	0.846876	12988	0.12588	1130	0.0109519	1681	0.0162922
Physical and Mathematical Sciences	Atmospheric Sciences and Meteorology	40270	0.892964	3389	0.0751491	427	0.00946848	1011	0.0224183
Physical and Mathematical Sciences	Biostatistics	87190	0.953876	2289	0.0250421	515	0.0056342	1412	0.0154476
Physical and Mathematical Sciences	Chemical Sciences, various	15513	0.933394	468	0.0281588	156	0.00938628	483	0.0290614
Physical and Mathematical Sciences	Chemistry	195300	0.929664	6558	0.0312173	2262	0.0107675	5956	0.0283516
Physical and Mathematical Sciences	Computational Sciences	5145	0.557966	3592	0.389546	115	0.0124715	369	0.0400174
Physical and Mathematical Sciences	Computer and Information Sciences, various	7014	0.453364	7236	0.467714	383	0.024756	838	0.0541659
Physical and Mathematical Sciences	Computer Science	81926	0.379048	118361	0.547623	4242	0.0196265	11607	0.0537023
Physical and Mathematical Sciences	Geology/Earth Science, General	80146	0.808877	14950	0.150884	1234	0.0124542	2753	0.0277848
Physical and Mathematical Sciences	Geophysics	9491	0.769	2473	0.200373	138	0.0111813	240	0.0194458
Physical and Mathematical Sciences	Information Science/Studies	16139	0.467675	14713	0.426353	1034	0.0299632	2623	0.0760092
Physical and Mathematical Sciences	Information Technology/Information Systems	12923	0.551487	8231	0.351257	794	0.0338838	1485	0.0633722
Physical and Mathematical Sciences	Marine Sciences	33123	0.910898	1730	0.0475758	328	0.00902016	1182	0.0325056
Physical and Mathematical Sciences	Mathematics	90725	0.809575	10874	0.097033	4876	0.0435105	5590	0.0498818
Physical and Mathematical Sciences	Oceanography, Physical Sciences	23733	0.904838	1521	0.0579892	276	0.0105227	699	0.0266499
Physical and Mathematical Sciences	Physics, General	156208	0.832914	25496	0.135947	2124	0.0113253	3716	0.019814
Physical and Mathematical Sciences	Statistics	46764	0.853124	4448	0.0811457	1521	0.0277479	2082	0.0379823
Social and Behavioral Sciences	Anthropology	29339	0.626795	424	0.00905828	5017	0.107183	12028	0.256965
Social and Behavioral Sciences	Applied Economics	4656	0.824509	124	0.0219586	221	0.0391358	646	0.114397
Social and Behavioral Sciences	Clinical Psychology	11476	0.85629	97	0.00723773	309	0.0230563	1520	0.113416
Social and Behavioral Sciences	Counseling Psychology	10083	0.777409	94	0.00724749	589	0.0454125	2204	0.169931
Social and Behavioral Sciences	Criminal Justice and Criminology	12475	0.666827	102	0.00545221	1879	0.100438	4252	0.227282
Social and Behavioral Sciences	Economics, General	48384	0.770556	615	0.0097944	3923	0.0624771	9869	0.157172
Social and Behavioral Sciences	Educational Psychology	16868	0.751827	486	0.0216616	1153	0.0513906	3929	0.17512
Social and Behavioral Sciences	Geography	28195	0.792885	1798	0.0505624	1521	0.0427728	4046	0.11378
Social and Behavioral Sciences	International Affairs and Development	14235	0.547753	389	0.0149684	3763	0.144798	7601	0.292481
Social and Behavioral Sciences	Political Science	36256	0.579419	396	0.00632861	9273	0.148195	16648	0.266057
Social and Behavioral Sciences	Psychology, General	155513	0.814221	4270	0.0223565	5827	0.0305085	25386	0.132914
Social and Behavioral Sciences	Psychology, various	15380	0.846963	245	0.0134919	512	0.0281954	2022	0.11135
Social and Behavioral Sciences	Public Administration	14600	0.667276	605	0.0276508	2093	0.0956581	4582	0.209415
Social and Behavioral Sciences	Public Policy	28146	0.696769	1099	0.0272063	3292	0.0814952	7858	0.194529
Social and Behavioral Sciences	School Psychology	7365	0.791935	146	0.0156989	342	0.0367742	1447	0.155591
Social and Behavioral Sciences	Social Sciences, various	8540	0.68413	594	0.0475847	953	0.0763438	2396	0.191941
Social and Behavioral Sciences	Social Work/Social Welfare	28864	0.803206	161	0.00448019	1830	0.0509239	5081	0.14139
Social and Behavioral Sciences	Sociology	36751	0.64599	514	0.00903482	5423	0.0953226	14203	0.249653
