# Supplementary material for: The Rhythms of Scholarly Publication: Suggestions to Enhance Bibliometric Comparisons Across Disciplines
Source: Front Res Metr Anal. 2022 Jan 25;7:812312. doi: 10.3389/frma.2022.812312 (PMC8821823; doi:10.3389/frma.2022.812312)
Supplement: Supplementary file 2 [file Table_2.XLSX]

## Sheet: Table 2
Supplemental Table 2. Mean and median counts of publications in each discipline over the most recent 3-, 5-, and 10-year timeframes (ending in 2019).
Broad Field	Discipline	Timeframe (years)	Mean Articles Per Person	Median Articles Per Person	Mean Conference Proceedings Per Person	Median Conference Proceedings Per Person	Mean Books Per Person	Median Books Per Person	Mean Chapters Per Person	Median Chapters Per Person
Agricultural Sciences	Agricultural Economics	3	7.4739	6	0.0923695	0	0.131191	0	0.518072	0
Agricultural Sciences	Agricultural Economics	5	10.5448	8	0.131191	0	0.206158	0	0.880857	0
Agricultural Sciences	Agricultural Economics	10	16.0482	12	0.195448	0	0.51004	0	1.45649	0
Agricultural Sciences	Agriculture, various	3	7.34191	4	0.253676	0	0.106618	0	0.404412	0
Agricultural Sciences	Agriculture, various	5	10.3419	6	0.386029	0	0.132353	0	0.694853	0
Agricultural Sciences	Agriculture, various	10	15.1213	9	0.683824	0	0.264706	0	1.02941	0
Agricultural Sciences	Agronomy and Crop Science	3	15.949	12	0.359694	0	0.0471939	0	0.38648	0
Agricultural Sciences	Agronomy and Crop Science	5	22.0166	17	0.484694	0	0.0880102	0	0.602041	0
Agricultural Sciences	Agronomy and Crop Science	10	32.1046	25.5	0.862245	0	0.192602	0	0.975765	0
Agricultural Sciences	Animal Sciences	3	20.3957	13	0.141797	0	0.0610058	0	0.37263	0
Agricultural Sciences	Animal Sciences	5	27.1022	19	0.162407	0	0.0816158	0	0.551525	0
Agricultural Sciences	Animal Sciences	10	38.6331	28	0.33141	0	0.202803	0	1.06843	0
Agricultural Sciences	Food Science	3	16.3794	11	0.131429	0	0.0994286	0	0.473143	0
Agricultural Sciences	Food Science	5	23.344	16	0.157714	0	0.142857	0	0.756571	0
Agricultural Sciences	Food Science	10	34.5337	24	0.315429	0	0.420571	0	1.55314	0
Agricultural Sciences	Horticulture	3	11.4157	9	0.97615	0	0.076661	0	0.327087	0
Agricultural Sciences	Horticulture	5	16.0613	13	1.477	0	0.103918	0	0.550256	0
Agricultural Sciences	Horticulture	10	24.3543	19	2.26576	0	0.277683	0	0.918228	0
Agricultural Sciences	Plant Sciences	3	12.746	10	0.301205	0	0.0753012	0	0.39257	0
Agricultural Sciences	Plant Sciences	5	18.2299	14	0.435743	0	0.11747	0	0.62249	0
Agricultural Sciences	Plant Sciences	10	27.6616	21	0.747992	0	0.345382	0	1.13052	0
Agricultural Sciences	Soil Science	3	14.5517	11	0.369509	0	0.0749354	0	0.387597	0
Agricultural Sciences	Soil Science	5	20.3811	15	0.475452	0	0.125323	0	0.700258	0
Agricultural Sciences	Soil Science	10	30.0581	22	0.868217	0	0.337209	0	1.10336	0
Biological and Biomedical Sciences	Anatomy	3	11.466	8	0.399177	0	0.0812757	0	0.414609	0
Biological and Biomedical Sciences	Anatomy	5	17.4763	12	0.484568	0	0.125514	0	0.70679	0
Biological and Biomedical Sciences	Anatomy	10	28.642	20	0.770576	0	0.298354	0	1.34259	0
Biological and Biomedical Sciences	Biochemistry	3	14.5279	10	0.387706	0	0.0710356	0	0.364745	0
Biological and Biomedical Sciences	Biochemistry	5	22.0354	15	0.475724	0	0.109782	0	0.631428	0
Biological and Biomedical Sciences	Biochemistry	10	36.2564	25	0.732361	0	0.326955	0	1.23105	0
Biological and Biomedical Sciences	Bioinformatics and Computational Biology	3	24.7962	17	1.67773	0	0.0995261	0	0.486572	0
Biological and Biomedical Sciences	Bioinformatics and Computational Biology	5	35.6177	24	2.27014	0	0.134281	0	0.804107	0
Biological and Biomedical Sciences	Bioinformatics and Computational Biology	10	52.9874	37	3.57662	1	0.379147	0	1.62875	0
Biological and Biomedical Sciences	Biological Sciences, various	3	13.9463	9	0.710744	0	0.132231	0	0.508264	0
Biological and Biomedical Sciences	Biological Sciences, various	5	20.7851	13	0.842975	0	0.181818	0	0.735537	0
Biological and Biomedical Sciences	Biological Sciences, various	10	32.3636	21	1.17769	0	0.438017	0	1.43802	0
Biological and Biomedical Sciences	Biology/Biological Sciences, General	3	11.196	8	0.287243	0	0.0709465	0	0.320823	0
Biological and Biomedical Sciences	Biology/Biological Sciences, General	5	16.8235	12	0.359506	0	0.1093	0	0.552757	0
Biological and Biomedical Sciences	Biology/Biological Sciences, General	10	27.1664	19	0.539918	0	0.30749	0	1.07473	0
Biological and Biomedical Sciences	Biomedical Sciences, General	3	13.7368	8	0.46831	0	0.0572183	0	0.367077	0
Biological and Biomedical Sciences	Biomedical Sciences, General	5	20.6611	12	0.525528	0	0.0827465	0	0.576585	0
Biological and Biomedical Sciences	Biomedical Sciences, General	10	33.0211	20	0.676937	0	0.214789	0	1.12852	0
Biological and Biomedical Sciences	Biomedical Sciences, various	3	15.775	10	0.63125	0	0.078125	0	0.5625	0
Biological and Biomedical Sciences	Biomedical Sciences, various	5	23.9312	16	0.75625	0	0.11875	0	0.940625	0
Biological and Biomedical Sciences	Biomedical Sciences, various	10	38.0984	24.5	1.49687	0	0.39375	0	1.73281	0
Biological and Biomedical Sciences	Biophysics	3	19.271	11.5	0.298319	0	0.085084	0	0.402311	0
Biological and Biomedical Sciences	Biophysics	5	28.6891	18	0.389706	0	0.119748	0	0.665966	0
Biological and Biomedical Sciences	Biophysics	10	46.9884	30	1.2437	0	0.301471	0	1.33718	0
Biological and Biomedical Sciences	Botany/Plant Biology	3	13.9181	11	0.336283	0	0.0884956	0	0.45354	0
Biological and Biomedical Sciences	Botany/Plant Biology	5	20.6704	15	0.438053	0	0.14823	0	0.778761	0
Biological and Biomedical Sciences	Botany/Plant Biology	10	32.7102	24	0.619469	0	0.44469	0	1.5708	1
Biological and Biomedical Sciences	Cell Biology	3	13.4007	9	0.360584	0	0.0562044	0	0.376277	0
Biological and Biomedical Sciences	Cell Biology	5	20.3876	13	0.430292	0	0.0919708	0	0.690146	0
Biological and Biomedical Sciences	Cell Biology	10	33.5777	22	0.691606	0	0.263139	0	1.34964	0
Biological and Biomedical Sciences	Cognitive Science	3	16.8346	12	1.29596	0	0.174632	0	1.06618	0
Biological and Biomedical Sciences	Cognitive Science	5	25.1838	18	1.77941	0	0.308824	0	1.94118	1
Biological and Biomedical Sciences	Cognitive Science	10	40.1967	29	2.80147	0	0.90625	0	3.61581	2
Biological and Biomedical Sciences	Developmental Biology	3	13.9561	9	0.324363	0	0.0580737	0	0.464589	0
Biological and Biomedical Sciences	Developmental Biology	5	21.3371	15	0.406516	0	0.0849858	0	0.764873	0
Biological and Biomedical Sciences	Developmental Biology	10	34.9405	24	0.633144	0	0.256374	0	1.51133	1
Biological and Biomedical Sciences	Ecology	3	17.0135	13	0.421436	0	0.101977	0	0.434964	0
Biological and Biomedical Sciences	Ecology	5	24.9501	20	0.492196	0	0.167534	0	0.739854	0
Biological and Biomedical Sciences	Ecology	10	38.6941	31	0.671176	0	0.525494	0	1.56712	1
Biological and Biomedical Sciences	Entomology	3	14.7082	12	0.58083	0	0.0772532	0	0.532189	0
Biological and Biomedical Sciences	Entomology	5	21.2718	18	0.659514	1	0.130186	0	0.779685	0
Biological and Biomedical Sciences	Entomology	10	33.0987	28	0.816881	1	0.379113	0	1.29185	0
Biological and Biomedical Sciences	Epidemiology	3	42.4023	28	0.860254	0	0.0859044	0	0.562008	0
Biological and Biomedical Sciences	Epidemiology	5	61.4495	40	0.958863	0	0.130672	0	0.875378	0
Biological and Biomedical Sciences	Epidemiology	10	91.2172	59	1.4755	0	0.362371	0	1.5977	0
Biological and Biomedical Sciences	Evolutionary Biology	3	17.2215	13	0.347772	0	0.149752	0	0.587871	0
Biological and Biomedical Sciences	Evolutionary Biology	5	25.427	20	0.407178	0	0.235149	0	0.993812	0
Biological and Biomedical Sciences	Evolutionary Biology	10	39.8688	32	0.555693	0	0.695545	0	2.06807	1
Biological and Biomedical Sciences	Genetics	3	20.315	13	0.547817	0	0.0665281	0	0.488565	0
Biological and Biomedical Sciences	Genetics	5	29.9969	20	0.655925	0	0.107069	0	0.837838	0
Biological and Biomedical Sciences	Genetics	10	47.1809	31	1.05405	0	0.347193	0	1.58524	1
Biological and Biomedical Sciences	Human and Medical Genetics	3	26.8526	17	0.487713	0	0.0907372	0	0.586011	0
Biological and Biomedical Sciences	Human and Medical Genetics	5	39.7221	25	0.584121	0	0.151229	0	1.01512	0
Biological and Biomedical Sciences	Human and Medical Genetics	10	62.6957	41	0.969754	0	0.440454	0	1.82609	0
Biological and Biomedical Sciences	Immunology	3	17.5504	11	0.454133	0	0.0730847	0	0.521169	0
Biological and Biomedical Sciences	Immunology	5	26.3684	17	0.482359	0	0.108871	0	0.90373	0
Biological and Biomedical Sciences	Immunology	10	42.746	28	0.739415	0	0.292339	0	1.75554	1
Biological and Biomedical Sciences	Microbiology	3	14.7496	10	0.296804	0	0.061117	0	0.409554	0
Biological and Biomedical Sciences	Microbiology	5	22.4296	16	0.335441	0	0.0994029	0	0.744995	0
Biological and Biomedical Sciences	Microbiology	10	36.7857	26	0.533193	0	0.283808	0	1.47945	1
Biological and Biomedical Sciences	Molecular Biology	3	13.5027	9	0.358307	0	0.068323	0	0.388975	0
Biological and Biomedical Sciences	Molecular Biology	5	20.5054	14	0.415761	0	0.105978	0	0.699922	0
Biological and Biomedical Sciences	Molecular Biology	10	33.9713	23	0.630047	0	0.309783	0	1.41693	0
Biological and Biomedical Sciences	Molecular Genetics	3	16.3358	11	0.356704	0	0.0664207	0	0.412054	0
Biological and Biomedical Sciences	Molecular Genetics	5	24.433	16	0.407134	0	0.111931	0	0.742927	0
Biological and Biomedical Sciences	Molecular Genetics	10	39.2128	27	0.602706	0	0.277983	0	1.37884	0
Biological and Biomedical Sciences	Molecular Pharmacology	3	19.8163	12	0.590551	0	0.115486	0	0.577428	0
Biological and Biomedical Sciences	Molecular Pharmacology	5	29.9213	20	0.661417	0	0.170604	0	0.963255	0
Biological and Biomedical Sciences	Molecular Pharmacology	10	48.1417	30	0.860892	0	0.354331	0	1.94488	1
Biological and Biomedical Sciences	Neurobiology/Neuroscience	3	15.637	10	0.347712	0	0.0997821	0	0.596514	0
Biological and Biomedical Sciences	Neurobiology/Neuroscience	5	23.3181	15	0.488453	0	0.152505	0	1.08845	0
Biological and Biomedical Sciences	Neurobiology/Neuroscience	10	37.5608	25	0.7878	0	0.40915	0	2.09455	1
Biological and Biomedical Sciences	Oncology and Cancer Biology	3	18.8201	12	1	0	0.0530303	0	0.409091	0
Biological and Biomedical Sciences	Oncology and Cancer Biology	5	28.7841	19	1.07197	0	0.0719697	0	0.685606	0
Biological and Biomedical Sciences	Oncology and Cancer Biology	10	46.8371	33	1.30871	0	0.193182	0	1.29545	0
Biological and Biomedical Sciences	Oral Biology and Craniofacial Science	3	13.8177	10	0.166667	0	0.0572917	0	0.458333	0
Biological and Biomedical Sciences	Oral Biology and Craniofacial Science	5	20.724	15	0.25	0	0.0989583	0	0.703125	0
Biological and Biomedical Sciences	Oral Biology and Craniofacial Science	10	33.3906	25.5	0.380208	0	0.234375	0	1.46354	1
Biological and Biomedical Sciences	Pathology	3	17.094	11	0.480839	0	0.0839416	0	0.618613	0
Biological and Biomedical Sciences	Pathology	5	25.6393	16	0.526764	0	0.126521	0	1.06144	0
Biological and Biomedical Sciences	Pathology	10	40.6442	26	0.789842	0	0.305049	0	1.83607	0
Biological and Biomedical Sciences	Pharmaceutical Sciences	3	16.5431	12	0.333109	0	0.0753701	0	0.459623	0
Biological and Biomedical Sciences	Pharmaceutical Sciences	5	24.7153	17	0.391655	0	0.115074	0	0.773217	0
Biological and Biomedical Sciences	Pharmaceutical Sciences	10	39.9118	28	0.5821	0	0.276581	0	1.48452	0
Biological and Biomedical Sciences	Pharmacology	3	17.8253	11	0.528443	0	0.0698603	0	0.454591	0
Biological and Biomedical Sciences	Pharmacology	5	27.0714	17	0.583832	0	0.107784	0	0.823353	0
Biological and Biomedical Sciences	Pharmacology	10	44.2585	29	0.908683	0	0.280938	0	1.56387	0
Biological and Biomedical Sciences	Physiology, General	3	14.2709	10	0.255783	0	0.0658363	0	0.387456	0
Biological and Biomedical Sciences	Physiology, General	5	21.5436	15	0.338523	0	0.105427	0	0.66637	0
Biological and Biomedical Sciences	Physiology, General	10	35.4195	25	0.735765	0	0.266904	0	1.30427	0
Biological and Biomedical Sciences	Plant Pathology	3	13.8308	11	0.255988	0	0.0553892	0	0.431138	0
Biological and Biomedical Sciences	Plant Pathology	5	19.6123	15.5	0.401198	0	0.0913174	0	0.651198	0
Biological and Biomedical Sciences	Plant Pathology	10	30.0254	24	0.678144	0	0.273952	0	1.10778	0
Biological and Biomedical Sciences	Structural Biology	3	19.6842	14	0.646617	0	0.0676692	0	0.233083	0
Biological and Biomedical Sciences	Structural Biology	5	29.5038	20	0.759398	0	0.0827068	0	0.548872	0
Biological and Biomedical Sciences	Structural Biology	10	48.5714	34	1.04511	0	0.330827	0	1.2406	0
Biological and Biomedical Sciences	Toxicology	3	15.5788	10	0.387967	0	0.0705394	0	0.417012	0
Biological and Biomedical Sciences	Toxicology	5	23.7324	15	0.421162	0	0.109959	0	0.748963	0
Biological and Biomedical Sciences	Toxicology	10	39.029	27	0.90249	0	0.288382	0	1.41286	0
Biological and Biomedical Sciences	Zoology	3	13.0219	10	0.229508	0	0.0983607	0	0.289617	0
Biological and Biomedical Sciences	Zoology	5	18.847	15	0.31694	0	0.142077	0	0.486339	0
Biological and Biomedical Sciences	Zoology	10	30.0219	25	0.497268	0	0.311475	0	0.972678	0
Business	Accounting	3	3.16169	2	0.0455659	0	0.193043	0	0.10583	0
Business	Accounting	5	4.75551	3	0.0783929	0	0.288094	0	0.168545	0
Business	Accounting	10	8.07202	5	0.130328	0	0.691328	0	0.339049	0
Business	Business Administration	3	4.48736	3	0.800663	0	0.140489	0	0.495234	0
Business	Business Administration	5	6.77621	5	1.22669	0	0.231247	0	0.830916	0
Business	Business Administration	10	11.1761	7	1.71405	0	0.632822	0	1.72814	0
Business	Business, various	3	5.81922	4	0.799323	0	0.231583	0	0.605419	0
Business	Business, various	5	8.33192	5	1.23709	0	0.350127	0	0.992379	0
Business	Business, various	10	12.8654	8	1.63124	0	0.841236	0	1.79255	0
Business	Finance	3	3.99682	3	0.0577798	0	0.0946315	0	0.197452	0
Business	Finance	5	6.07825	4	0.0841674	0	0.155141	0	0.344859	0
Business	Finance	10	10.6388	7	0.11556	0	0.460419	0	0.754777	0
Business	Management	3	5.07779	3	1.70571	0	0.209997	0	0.658977	0
Business	Management	5	7.4614	5	2.56078	1	0.330376	0	1.07986	0
Business	Management	10	12.0941	8	3.49956	1	0.864833	0	2.07572	1
Business	Management Information Systems	3	4.97539	3	1	0	0.133716	0	0.26251	0
Business	Management Information Systems	5	7.45857	5	1.58819	0	0.202625	0	0.445447	0
Business	Management Information Systems	10	12.0829	8	2.52092	0	0.636587	0	1.03774	0
Business	Marketing	3	4.30651	3	0.585616	0	0.130708	0	0.608447	0
Business	Marketing	5	6.31621	5	1.26712	0	0.222603	0	1.04509	0
Business	Marketing	10	10.1421	7	1.46347	0	0.549087	0	1.85445	0
Education	Counselor Education	3	5.66244	3	0.0936585	0	0.258537	0	1.0761	0
Education	Counselor Education	5	8.04098	5	0.116098	0	0.390244	0	1.74146	0
Education	Counselor Education	10	11.561	7	0.153171	0	0.857561	0	2.89171	1
Education	Curriculum and Instruction	3	4.24021	3	0.253104	0	0.408787	0	1.4852	1
Education	Curriculum and Instruction	5	5.9532	4	0.353868	0	0.606495	0	2.22254	1
Education	Curriculum and Instruction	10	8.60506	6	0.454155	0	1.37106	0	3.38348	2
Education	Education, General	3	5.50279	3	0.249768	0	0.399721	0	1.45729	0
Education	Education, General	5	7.79434	4	0.348189	0	0.575673	0	2.25116	1
Education	Education, General	10	11.3394	7	0.490251	0	1.36444	0	3.73027	2
Education	Educational Evaluation and Research	3	7.19032	5	0.174194	0	0.406452	0	1.51613	1
Education	Educational Evaluation and Research	5	10.071	7	0.270968	0	0.587097	0	2.39355	1
Education	Educational Evaluation and Research	10	14.6258	11	0.374194	0	1.33226	0	4.1129	2
Education	Educational Leadership and Administration	3	4.52991	3	0.157366	0	0.482152	0	1.48014	1
Education	Educational Leadership and Administration	5	6.50126	4	0.214178	0	0.72549	0	2.37758	1
Education	Educational Leadership and Administration	10	9.59729	6	0.299145	0	1.54952	0	3.81498	2
Education	Foundations of Education	3	4.39336	3	0.146919	0	0.398104	0	1.33649	1
Education	Foundations of Education	5	6.25118	4	0.199052	0	0.599526	0	2.14455	1
Education	Foundations of Education	10	9.13507	7	0.279621	0	1.24408	0	3.43839	2
Education	Higher Education/Higher Education Administration	3	5.91692	4	0.144615	0	0.513846	0	1.78154	1
Education	Higher Education/Higher Education Administration	5	8.30462	6	0.172308	0	0.695385	0	2.68923	1
Education	Higher Education/Higher Education Administration	10	11.9631	9	0.190769	0	1.46462	0	4.33538	2
Education	Mathematics Education	3	4.15882	3	0.347059	0	0.329412	0	1.06471	0
Education	Mathematics Education	5	6.31176	5	0.6	0	0.494118	0	1.74118	0
Education	Mathematics Education	10	9.35882	7	0.947059	0	1.14706	0	2.77647	1
Education	Science Education	3	4.10156	3	0.351562	0	0.351562	0	1.30469	0
Education	Science Education	5	6.35156	4.5	0.648438	0	0.515625	0	2.15625	0
Education	Science Education	10	9.27344	7	1.07031	0	1.15625	0	3.32812	1
Education	Special Education	3	6.63832	4	0.110406	0	0.25	0	1.06853	0
Education	Special Education	5	9.29315	6	0.156091	0	0.365482	0	1.67005	0
Education	Special Education	10	13.585	8	0.206853	0	0.899746	0	2.74112	1
Education	Teacher Education Specific Levels	3	3.53387	2	0.314459	0	0.330637	0	1.18402	0
Education	Teacher Education Specific Levels	5	5.02224	3	0.430738	0	0.491405	0	1.70273	1
Education	Teacher Education Specific Levels	10	7.19515	5	0.591507	0	1.2457	0	2.69363	1
Education	Teacher Education Specific Subject Areas	3	4.40705	2	0.377502	0	0.329838	0	1.24786	0
Education	Teacher Education Specific Subject Areas	5	6.16111	4	0.502383	0	0.469971	0	1.88942	0
Education	Teacher Education Specific Subject Areas	10	8.99905	5	0.696854	0	1.04957	0	2.96092	1
Engineering	Aerospace Engineering	3	12.5501	9	7.73935	4	0.127283	0	0.28611	0
Engineering	Aerospace Engineering	5	18.4128	13	11.2131	6	0.183177	0	0.524626	0
Engineering	Aerospace Engineering	10	28.3841	20	19.0714	10	0.514665	0	1.13946	0
Engineering	Agricultural/Biological Engineering and Bioengineering	3	20.7605	14	1.7887	0	0.111447	0	0.514372	0
Engineering	Agricultural/Biological Engineering and Bioengineering	5	30.5693	21	2.53404	0	0.15885	0	0.892587	0
Engineering	Agricultural/Biological Engineering and Bioengineering	10	47.5103	32	4.94705	1	0.439738	0	1.74987	1
Engineering	Biomedical Engineering	3	18.6602	13	3.43097	0	0.087621	0	0.585838	0
Engineering	Biomedical Engineering	5	27.8467	19	5.03107	1	0.135507	0	1.0647	0
Engineering	Biomedical Engineering	10	43.8609	31	9.21243	3	0.421294	0	1.96179	1
Engineering	Chemical Engineering	3	20.1005	13	1.21728	0	0.0997092	0	0.415039	0
Engineering	Chemical Engineering	5	29.6423	20	1.68841	0	0.143747	0	0.673868	0
Engineering	Chemical Engineering	10	46.0424	30	2.65434	0	0.415455	0	1.32156	0
Engineering	Civil Engineering	3	14.7337	11	2.62011	1	0.103796	0	0.341044	0
Engineering	Civil Engineering	5	21.0113	15	3.87426	1	0.154508	0	0.507711	0
Engineering	Civil Engineering	10	30.9104	23	6.28974	3	0.476275	0	1.03944	0
Engineering	Computer Engineering	3	11.4784	7	13.0416	9	0.14996	0	0.354082	0
Engineering	Computer Engineering	5	16.7298	10	19.5481	14	0.22211	0	0.624495	0
Engineering	Computer Engineering	10	26.0713	16	32.0414	22	0.737065	0	1.44826	0
Engineering	Electrical Engineering	3	12.6655	8	13.4619	9	0.150812	0	0.353025	0
Engineering	Electrical Engineering	5	18.5483	11	20.2461	14	0.222738	0	0.610209	0
Engineering	Electrical Engineering	10	29.1103	18	33.4001	23	0.779225	0	1.39104	0
Engineering	Engineering Mechanics	3	15.125	11	5.52381	2	0.107143	0	0.282738	0
Engineering	Engineering Mechanics	5	22.1161	16	7.91369	3	0.127976	0	0.473214	0
Engineering	Engineering Mechanics	10	33.5149	23	13.6548	6	0.5	0	1.13393	0
Engineering	Engineering, General	3	11.6807	6	5.6004	2	0.14257	0	0.459839	0
Engineering	Engineering, General	5	17.5361	10	8.20482	3	0.190763	0	0.736948	0
Engineering	Engineering, General	10	27.49	15	13.4719	5	0.586345	0	1.46185	0
Engineering	Engineering, various	3	10.1593	6	5.16778	1	0.109422	0	0.266261	0
Engineering	Engineering, various	5	14.3581	8	7.61884	2	0.160486	0	0.486322	0
Engineering	Engineering, various	10	21.2261	12	11.5234	3	0.425532	0	0.986018	0
Engineering	Environmental Engineering	3	16.5056	12	2.34864	1	0.103436	0	0.360579	0
Engineering	Environmental Engineering	5	23.6112	18	3.48391	1	0.158409	0	0.545027	0
Engineering	Environmental Engineering	10	35.0347	25	5.74213	2	0.498373	0	1.10669	0
Engineering	Geological and Mining Engineering	3	12.9607	9	4.77946	1	0.0876133	0	0.151057	0
Engineering	Geological and Mining Engineering	5	17.7734	12	6.05438	2	0.114804	0	0.305136	0
Engineering	Geological and Mining Engineering	10	25.1239	16	8.16314	3	0.36858	0	0.818731	0
Engineering	Industrial Engineering	3	10.6426	7	3.33542	1	0.131661	0	0.279781	0
Engineering	Industrial Engineering	5	15.1654	11	4.98903	2	0.204545	0	0.478056	0
Engineering	Industrial Engineering	10	22.5658	16	8.00784	4	0.721787	0	1.09483	0
Engineering	Materials Engineering	3	20.8955	12	3.66951	1	0.115139	0	0.434968	0
Engineering	Materials Engineering	5	30.661	19	5.01066	1	0.183369	0	0.641791	0
Engineering	Materials Engineering	10	47.2751	28	7.76972	2	0.528785	0	1.13006	0
Engineering	Materials Science and Engineering	3	28.8108	17	2.86967	1	0.12012	0	0.442643	0
Engineering	Materials Science and Engineering	5	42.2577	26	3.95015	1	0.192793	0	0.696096	0
Engineering	Materials Science and Engineering	10	65.6018	40	6.98859	2	0.575976	0	1.36276	0
Engineering	Mechanical Engineering	3	14.6049	10	5.55784	2	0.120439	0	0.305348	0
Engineering	Mechanical Engineering	5	21.2307	14	8.18823	4	0.17641	0	0.524876	0
Engineering	Mechanical Engineering	10	32.5075	22	14.0292	7	0.467454	0	1.08748	0
Engineering	Nuclear Engineering	3	16.1946	12	3.24551	1	0.116766	0	0.323353	0
Engineering	Nuclear Engineering	5	23.7695	17.5	4.97006	2	0.149701	0	0.482036	0
Engineering	Nuclear Engineering	10	36.0749	25	8.53892	3	0.320359	0	0.973054	0
Engineering	Operations Research	3	6.52975	4	1.38623	0	0.135356	0	0.213536	0
Engineering	Operations Research	5	9.71062	6	2.08051	0	0.1972	0	0.350058	0
Engineering	Operations Research	10	15.2987	10	3.35006	1	0.605601	0	0.848308	0
Engineering	Systems Engineering	3	10.7968	8	5.21347	2	0.170091	0	0.406393	0
Engineering	Systems Engineering	5	15.6769	11	7.65753	3	0.251142	0	0.689498	0
Engineering	Systems Engineering	10	23.7763	17	12.7374	5	0.916667	0	1.4863	0
Family, Consumer and Human Sciences	Architecture	3	2.53707	0	0.548051	0	0.312466	0	0.568918	0
Family, Consumer and Human Sciences	Architecture	5	3.5788	0	0.78693	0	0.465129	0	0.866557	0
Family, Consumer and Human Sciences	Architecture	10	5.1933	1	1.21362	0	1.07084	0	1.39319	0
Family, Consumer and Human Sciences	Architecture, Design, Planning, various	3	2.67502	0	0.556568	0	0.224753	0	0.47836	0
Family, Consumer and Human Sciences	Architecture, Design, Planning, various	5	3.83599	1	0.797267	0	0.342445	0	0.748671	0
Family, Consumer and Human Sciences	Architecture, Design, Planning, various	10	5.81777	2	1.1306	0	0.759301	0	1.20273	0
Family, Consumer and Human Sciences	Communication and Communication Studies	3	4.82138	3	0.279394	0	0.403523	0	1.21835	0
Family, Consumer and Human Sciences	Communication and Communication Studies	5	7.0127	4	0.40721	0	0.578861	0	1.88079	1
Family, Consumer and Human Sciences	Communication and Communication Studies	10	10.5141	7	0.589103	0	1.3474	0	3.22859	1
Family, Consumer and Human Sciences	Consumer and Human Sciences, various	3	7.82195	5	0.292683	0	0.170732	0	0.480488	0
Family, Consumer and Human Sciences	Consumer and Human Sciences, various	5	11.3	7	0.446341	0	0.256098	0	0.868293	0
Family, Consumer and Human Sciences	Consumer and Human Sciences, various	10	17.4829	10	0.526829	0	0.460976	0	1.27561	0
Family, Consumer and Human Sciences	Family and Human Sciences, various	3	8.61388	5	0.188537	0	0.193062	0	0.844646	0
Family, Consumer and Human Sciences	Family and Human Sciences, various	5	11.8839	7	0.235294	0	0.298643	0	1.36652	0
Family, Consumer and Human Sciences	Family and Human Sciences, various	10	17.6546	10	0.315234	0	0.710407	0	2.26998	0
Family, Consumer and Human Sciences	Health Promotion, Kinesiology, Exercise Science and Rehab	3	16.0315	10	0.271554	0	0.101951	0	0.534298	0
Family, Consumer and Human Sciences	Health Promotion, Kinesiology, Exercise Science and Rehab	5	22.9421	14	0.37854	0	0.153241	0	0.853996	0
Family, Consumer and Human Sciences	Health Promotion, Kinesiology, Exercise Science and Rehab	10	32.7379	20	0.582127	0	0.382316	0	1.38137	0
Family, Consumer and Human Sciences	Health, Physical Education, Recreation	3	12.0216	7	0.161364	0	0.156818	0	0.590909	0
Family, Consumer and Human Sciences	Health, Physical Education, Recreation	5	16.9602	10	0.207955	0	0.225	0	0.872727	0
Family, Consumer and Human Sciences	Health, Physical Education, Recreation	10	23.5909	15	0.268182	0	0.486364	0	1.41705	0
Family, Consumer and Human Sciences	Human Development and Family Studies, General	3	11.552	7	0.168755	0	0.24392	0	1.12601	0
Family, Consumer and Human Sciences	Human Development and Family Studies, General	5	16.4171	10	0.257922	0	0.35888	0	1.88799	0
Family, Consumer and Human Sciences	Human Development and Family Studies, General	10	24.101	14	0.380251	0	0.826824	0	3.09359	1
Family, Consumer and Human Sciences	Mass Communications/Media Studies	3	3.56594	1	0.43074	0	0.420304	0	1.09108	0
Family, Consumer and Human Sciences	Mass Communications/Media Studies	5	5.10199	2	0.643264	0	0.604839	0	1.66271	0
Family, Consumer and Human Sciences	Mass Communications/Media Studies	10	7.37903	4	0.979127	0	1.39564	0	2.73292	1
Family, Consumer and Human Sciences	Nutrition Sciences	3	18.5242	12	0.184211	0	0.0924609	0	0.455192	0
Family, Consumer and Human Sciences	Nutrition Sciences	5	26.6693	17	0.217639	0	0.142248	0	0.730441	0
Family, Consumer and Human Sciences	Nutrition Sciences	10	39.5946	25	0.357752	0	0.381223	0	1.32148	0
Family, Consumer and Human Sciences	Urban and Regional Planning	3	6.01338	3	0.212932	0	0.439242	0	1.06689	0
Family, Consumer and Human Sciences	Urban and Regional Planning	5	8.50279	5	0.285396	0	0.637681	0	1.78038	0
Family, Consumer and Human Sciences	Urban and Regional Planning	10	12.6243	8	0.403567	0	1.49498	0	3.04013	1
Health Professions Sciences	Communication Disorders and Sciences	3	8.48508	5	0.228275	0	0.146563	0	0.476005	0
Health Professions Sciences	Communication Disorders and Sciences	5	12.0584	8	0.322957	0	0.217899	0	0.749676	0
Health Professions Sciences	Communication Disorders and Sciences	10	18.1958	12	0.548638	0	0.540856	0	1.30999	0
Health Professions Sciences	Environmental Health Sciences	3	21.3477	13	0.586928	0	0.0823529	0	0.394771	0
Health Professions Sciences	Environmental Health Sciences	5	31.183	20	0.658824	0	0.117647	0	0.738562	0
Health Professions Sciences	Environmental Health Sciences	10	47.0993	30	1.67582	0	0.330719	0	1.39346	0
Health Professions Sciences	Health Professions, various	3	18.7068	11	0.398904	0	0.140822	0	0.534247	0
Health Professions Sciences	Health Professions, various	5	26.6871	15	0.539726	0	0.210411	0	0.836712	0
Health Professions Sciences	Health Professions, various	10	38.7392	22	0.81589	0	0.545753	0	1.59562	0
Health Professions Sciences	Medical Sciences, various	3	16.0659	8	0.992674	0	0.0805861	0	0.388278	0
Health Professions Sciences	Medical Sciences, various	5	23.6667	11	1.31502	0	0.14652	0	0.6337	0
Health Professions Sciences	Medical Sciences, various	10	36.0403	18	2.09524	0	0.29304	0	1.08059	0
Health Professions Sciences	Nursing	3	9.05692	5	0.102503	0	0.0880105	0	0.485639	0
Health Professions Sciences	Nursing	5	12.7157	6	0.138603	0	0.124901	0	0.725428	0
Health Professions Sciences	Nursing	10	18.2335	9	0.221344	0	0.313834	0	1.16759	0
Health Professions Sciences	Pharmacy	3	12.6149	6	0.253754	0	0.0698198	0	0.478228	0
Health Professions Sciences	Pharmacy	5	18.5443	10	0.304805	0	0.0998498	0	0.745495	0
Health Professions Sciences	Pharmacy	10	28.0908	14	0.453453	0	0.252252	0	1.36111	0
Health Professions Sciences	Public Health	3	23.1294	15	0.335625	0	0.116875	0	0.596562	0
Health Professions Sciences	Public Health	5	33.4263	22	0.40875	0	0.178125	0	0.963437	0
Health Professions Sciences	Public Health	10	48.8738	32	0.626563	0	0.459062	0	1.75719	0
Health Professions Sciences	Speech and Hearing Sciences	3	9.03178	6	0.314019	0	0.104673	0	0.437383	0
Health Professions Sciences	Speech and Hearing Sciences	5	12.815	9	0.403738	0	0.185047	0	0.663551	0
Health Professions Sciences	Speech and Hearing Sciences	10	19.529	13	0.714019	0	0.416822	0	1.29159	0
Health Professions Sciences	Veterinary Medical Sciences	3	13.1918	10	0.163441	0	0.0670968	0	0.636129	0
Health Professions Sciences	Veterinary Medical Sciences	5	19.2103	14	0.182366	0	0.103656	0	1.04817	0
Health Professions Sciences	Veterinary Medical Sciences	10	30.3114	22	0.336344	0	0.261505	0	2.01247	0
Humanities	American Studies	3	1.79301	1	0.0483871	0	0.712366	0	1.60484	1
Humanities	American Studies	5	2.94355	2	0.0645161	0	1.01344	1	2.48656	1.5
Humanities	American Studies	10	4.87903	3	0.094086	0	2.3871	1	4.05376	2
Humanities	Ancient Studies	3	2.12409	1	0.0145985	0	1.0146	0	1.62044	1
Humanities	Ancient Studies	5	3.10949	2	0.0291971	0	1.72993	1	2.71533	1
Humanities	Ancient Studies	10	5.17518	3	0.0437956	0	4.32847	2	4.66423	3
Humanities	Area and Ethnic Studies, various	3	2.44733	1	0.0175553	0	0.592328	0	1.60468	1
Humanities	Area and Ethnic Studies, various	5	3.75293	2	0.0227568	0	0.890767	0	2.42068	1
Humanities	Area and Ethnic Studies, various	10	5.93888	3	0.0351105	0	2.13589	1	4.11573	2
Humanities	Art History and Criticism	3	0.957717	0	0.0533827	0	0.464059	0	0.804968	0
Humanities	Art History and Criticism	5	1.48362	0	0.0739958	0	0.707717	0	1.22833	0
Humanities	Art History and Criticism	10	2.43763	1	0.120507	0	1.7463	1	2.07928	0
Humanities	Asian Languages	3	1.77143	1	0.0160714	0	0.642857	0	1.33571	1
Humanities	Asian Languages	5	2.72321	2	0.0357143	0	0.9625	1	2.07321	1
Humanities	Asian Languages	10	4.4	3	0.0446429	0	2.34821	1	3.50179	2
Humanities	Asian Studies	3	2.00138	1	0.031768	0	0.671271	0	1.42127	1
Humanities	Asian Studies	5	3.07735	2	0.0428177	0	0.975138	1	2.2058	1
Humanities	Asian Studies	10	4.9116	3	0.0566298	0	2.37845	1	3.64917	2
Humanities	Classics and Classical Languages	3	1.48319	1	0.0168067	0	0.594958	0	1.33697	0
Humanities	Classics and Classical Languages	5	2.32605	1	0.0243697	0	0.90084	1	2.08235	1
Humanities	Classics and Classical Languages	10	3.76975	3	0.0394958	0	2.23109	1	3.42521	2
Humanities	Comparative Literature	3	1.68333	1	0.00641026	0	0.75	0	1.77564	1
Humanities	Comparative Literature	5	2.71795	2	0.0115385	0	1.17564	1	2.78205	2
Humanities	Comparative Literature	10	4.75256	3	0.0141026	0	3.15513	2	4.91154	3
Humanities	Composition, Rhetoric and Writing	3	1.47963	1	0.131481	0	0.768519	0	2.21111	1
Humanities	Composition, Rhetoric and Writing	5	2.37593	1	0.194444	0	1.14444	1	3.35741	1
Humanities	Composition, Rhetoric and Writing	10	3.77778	2	0.283333	0	3.02963	2	5.92963	2
Humanities	English Language and Literature	3	1.43724	1	0.041113	0	0.67391	0	1.48914	1
Humanities	English Language and Literature	5	2.28935	1	0.0604971	0	1.01845	1	2.28013	1
Humanities	English Language and Literature	10	3.87854	2	0.0922307	0	2.47413	1	3.81913	2
Humanities	French Language and Literature	3	1.85739	1	0.0120275	0	0.561856	0	1.00515	0
Humanities	French Language and Literature	5	2.96048	2	0.0171821	0	0.845361	0	1.53093	1
Humanities	French Language and Literature	10	4.99141	4	0.0292096	0	2.10997	1	2.53608	1
Humanities	Gender Studies	3	2.665	1	0.0116667	0	0.586667	0	1.86833	1
Humanities	Gender Studies	5	4.10167	3	0.0266667	0	0.873333	1	2.79667	2
Humanities	Gender Studies	10	6.56667	4	0.0416667	0	1.86	1	4.57	3
Humanities	Germanic Languages and Literatures	3	2.02836	1	0.00378072	0	0.78828	0	1.20227	1
Humanities	Germanic Languages and Literatures	5	3.20038	2	0.00756144	0	1.14934	1	1.96597	1
Humanities	Germanic Languages and Literatures	10	5.29112	4	0.0094518	0	2.69565	2	3.29112	2
Humanities	History	3	2.50508	2	0.0105301	0	0.682825	0	1.16667	0
Humanities	History	5	3.86402	3	0.0157952	0	1.04375	1	1.83914	1
Humanities	History	10	6.3789	5	0.0254176	0	2.55919	1	3.11674	2
Humanities	Humanities/Humanistic Studies, General	3	3.6	1	0.125161	0	0.451613	0	1.25806	0
Humanities	Humanities/Humanistic Studies, General	5	5.50452	2	0.179355	0	0.716129	0	1.98968	1
Humanities	Humanities/Humanistic Studies, General	10	8.59484	4	0.258065	0	1.72387	1	3.31484	1
Humanities	Italian Language and Literature	3	2.00881	1	0.0132159	0	0.577093	0	1.10793	0
Humanities	Italian Language and Literature	5	3.18502	2	0.0176211	0	0.920705	0.5	1.7467	1
Humanities	Italian Language and Literature	10	5.23348	4	0.0264317	0	2.19383	1	2.73568	2
Humanities	Languages, various	3	1.61907	1	0.0223852	0	0.394442	0	0.782709	0
Humanities	Languages, various	5	2.42763	1	0.0274025	0	0.601698	0	1.18178	0
Humanities	Languages, various	10	3.77885	2	0.0355075	0	1.42609	1	1.82902	1
Humanities	Linguistics	3	4.61082	3	0.873049	0	0.379813	0	1.4589	1
Humanities	Linguistics	5	6.86785	4	1.25078	0	0.596254	0	2.35276	1
Humanities	Linguistics	10	10.6243	7	1.59938	0	1.436	1	4.17794	2
Humanities	Music specialties	3	0.615385	0	0.00307692	0	0.203077	0	0.353846	0
Humanities	Music specialties	5	0.978462	0	0.00307692	0	0.273846	0	0.523077	0
Humanities	Music specialties	10	1.57231	0	0.0615385	0	0.661538	0	0.855385	0
Humanities	Music, General	3	0.533438	0	0.0411749	0	0.165486	0	0.315237	0
Humanities	Music, General	5	0.834251	0	0.0561238	0	0.245476	0	0.483871	0
Humanities	Music, General	10	1.36664	0	0.0923158	0	0.595332	0	0.773669	0
Humanities	Near and Middle Eastern Languages and Cultures	3	2.11499	1	0.0143737	0	0.755647	0	1.70021	1
Humanities	Near and Middle Eastern Languages and Cultures	5	3.21766	2	0.036961	0	1.15195	1	2.61191	2
Humanities	Near and Middle Eastern Languages and Cultures	10	5.25051	3	0.0513347	0	3.06366	2	4.68583	3
Humanities	Performing and Visual Arts, various	3	0.614838	0	0.0807766	0	0.214942	0	0.438204	0
Humanities	Performing and Visual Arts, various	5	0.945398	0	0.112498	0	0.313919	0	0.676894	0
Humanities	Performing and Visual Arts, various	10	1.51465	0	0.183221	0	0.764084	0	1.12255	0
Humanities	Philosophy	3	3.3684	2	0.0567892	0	0.640699	0	2.34947	1
Humanities	Philosophy	5	5.20167	3	0.0899163	0	0.967601	0	3.55988	2
Humanities	Philosophy	10	8.51729	6	0.152894	0	2.42301	1	5.97852	3
Humanities	Religion/Religious Studies	3	2.30419	1	0.00433526	0	0.773844	0	1.87934	1
Humanities	Religion/Religious Studies	5	3.56214	2	0.00578035	0	1.17341	1	2.95303	2
Humanities	Religion/Religious Studies	10	5.87355	4	0.00794798	0	2.92847	2	4.97832	3
Humanities	Slavic Languages and Literatures	3	2.23059	1	0.0447059	0	0.717647	0	1.27294	1
Humanities	Slavic Languages and Literatures	5	3.44471	2	0.0541176	0	1.07059	1	1.92941	1
Humanities	Slavic Languages and Literatures	10	5.57412	3	0.08	0	2.58353	1	3.00941	2
Humanities	Spanish Language and Literature	3	2.14794	1	0.0240826	0	0.524083	0	1.00459	0
Humanities	Spanish Language and Literature	5	3.3039	2	0.0355505	0	0.816514	0	1.52294	1
Humanities	Spanish Language and Literature	10	5.23165	4	0.0401376	0	2.02638	1	2.3945	1
Humanities	Theatre Literature, History and Criticism	3	0.548631	0	0.0273843	0	0.194523	0	0.395656	0
Humanities	Theatre Literature, History and Criticism	5	0.897073	0	0.0302172	0	0.300283	0	0.707271	0
Humanities	Theatre Literature, History and Criticism	10	1.44759	0	0.0424929	0	0.732767	0	1.13031	0
Humanities	Theology/Theological Studies	3	1.82644	0	0.00369276	0	0.977843	0	1.89956	1
Humanities	Theology/Theological Studies	5	2.76292	1	0.00443131	0	1.45938	1	2.88552	1
Humanities	Theology/Theological Studies	10	4.42024	1	0.00516987	0	3.44387	2	4.7548	2
Natural Resources and Conservation	Environmental Sciences	3	14.5751	10	1.50465	0	0.135135	0	0.540541	0
Natural Resources and Conservation	Environmental Sciences	5	21.0815	15	1.67479	0	0.205583	0	0.901196	0
Natural Resources and Conservation	Environmental Sciences	10	31.9096	22	2.07488	0	0.535667	0	1.59016	0
Natural Resources and Conservation	Fisheries Science	3	15.7891	13	0.113379	0	0.0975057	0	0.44898	0
Natural Resources and Conservation	Fisheries Science	5	22.5533	19	0.154195	0	0.131519	0	0.664399	0
Natural Resources and Conservation	Fisheries Science	10	33.9592	28	0.235828	0	0.321995	0	1.06803	0
Natural Resources and Conservation	Forest Resources/Forestry	3	13.9036	10	0.204762	0	0.0833333	0	0.407143	0
Natural Resources and Conservation	Forest Resources/Forestry	5	19.8548	15	0.277381	0	0.121429	0	0.627381	0
Natural Resources and Conservation	Forest Resources/Forestry	10	29.0726	23	0.460714	0	0.32619	0	1.13333	0
Natural Resources and Conservation	Natural Resources	3	14.0534	11	0.41249	0	0.138044	0	0.562038	0
Natural Resources and Conservation	Natural Resources	5	20.1528	16	0.51438	0	0.193919	0	0.942482	0
Natural Resources and Conservation	Natural Resources	10	29.756	24	0.788003	0	0.528348	0	1.77075	0
Natural Resources and Conservation	Wildlife Science	3	16.8449	14	0.123596	0	0.119101	0	0.575281	0
Natural Resources and Conservation	Wildlife Science	5	24.0247	21	0.164045	0	0.159551	0	0.892135	0
Natural Resources and Conservation	Wildlife Science	10	35.7843	30	0.213483	0	0.388764	0	1.43371	0
Physical and Mathematical Sciences	Applied Mathematics	3	10.8943	8	2.09756	0	0.131707	0	0.221138	0
Physical and Mathematical Sciences	Applied Mathematics	5	16.0878	11	3.16911	0	0.2	0	0.505691	0
Physical and Mathematical Sciences	Applied Mathematics	10	25.9268	17	5.56423	1	0.652033	0	1.34472	0
Physical and Mathematical Sciences	Applied Physics	3	20.292	12	9.19912	3	0.130531	0	0.289823	0
Physical and Mathematical Sciences	Applied Physics	5	30.0177	18.5	13.7257	4	0.20354	0	0.466814	0
Physical and Mathematical Sciences	Applied Physics	10	48.9314	30	23.1327	7.5	0.597345	0	1	0
Physical and Mathematical Sciences	Astronomy and Astrophysics	3	42.4033	16	2.49414	1	0.0768067	0	0.159289	0
Physical and Mathematical Sciences	Astronomy and Astrophysics	5	60.4752	24	3.68634	1	0.124101	0	0.250095	0
Physical and Mathematical Sciences	Astronomy and Astrophysics	10	95.3246	39	6.44684	3	0.427166	0	0.635641	0
Physical and Mathematical Sciences	Atmospheric Sciences and Meteorology	3	18.8593	14	2.11609	0	0.0897098	0	0.315743	0
Physical and Mathematical Sciences	Atmospheric Sciences and Meteorology	5	27.7274	20	2.4934	0	0.131926	0	0.4635	0
Physical and Mathematical Sciences	Atmospheric Sciences and Meteorology	10	42.6508	32	3.31838	1	0.37467	0	0.888303	0
Physical and Mathematical Sciences	Biostatistics	3	35.6076	27	0.964861	0	0.103953	0	0.371157	0
Physical and Mathematical Sciences	Biostatistics	5	51.3236	38	1.16252	0	0.145681	0	0.558565	0
Physical and Mathematical Sciences	Biostatistics	10	75.642	56.5	1.86457	0	0.376281	0	1.03294	0
Physical and Mathematical Sciences	Chemical Sciences, various	3	18.4474	11.5	0.586842	0	0.0578947	0	0.328947	0
Physical and Mathematical Sciences	Chemical Sciences, various	5	27.5342	17	0.860526	0	0.102632	0	0.578947	0
Physical and Mathematical Sciences	Chemical Sciences, various	10	44.2947	28	1.27895	0	0.407895	0	1.26842	0
Physical and Mathematical Sciences	Chemistry	3	18.3841	12	0.570528	0	0.0891566	0	0.332901	0
Physical and Mathematical Sciences	Chemistry	5	27.4662	17	0.821872	0	0.141057	0	0.584801	0
Physical and Mathematical Sciences	Chemistry	10	44.1314	28	1.36534	0	0.419092	0	1.1038	0
Physical and Mathematical Sciences	Computational Sciences	3	9.28148	6	5.95926	2	0.0962963	0	0.411111	0
Physical and Mathematical Sciences	Computational Sciences	5	13.1852	9.5	9.05556	3	0.137037	0	0.674074	0
Physical and Mathematical Sciences	Computational Sciences	10	19.8741	13	14.5407	6	0.422222	0	1.36296	0
Physical and Mathematical Sciences	Computer and Information Sciences, various	3	6.89662	4	6.25249	1	0.16501	0	0.489066	0
Physical and Mathematical Sciences	Computer and Information Sciences, various	5	9.92048	6	9.35189	2	0.254473	0	0.823062	0
Physical and Mathematical Sciences	Computer and Information Sciences, various	10	14.9125	9	15.4493	5	0.759443	0	1.66402	0
Physical and Mathematical Sciences	Computer Science	3	7.1326	4	10.2852	7	0.123422	0	0.406491	0
Physical and Mathematical Sciences	Computer Science	5	10.4535	6	15.314	10	0.186691	0	0.749385	0
Physical and Mathematical Sciences	Computer Science	10	16.2134	9	24.672	17	0.695296	0	1.90264	0
Physical and Mathematical Sciences	Geology/Earth Science, General	3	14.6133	11	5.12798	2	0.0890263	0	0.275425	0
Physical and Mathematical Sciences	Geology/Earth Science, General	5	21.3713	15	5.49861	2	0.136631	0	0.451932	0
Physical and Mathematical Sciences	Geology/Earth Science, General	10	32.3719	23	6.16043	3	0.381144	0	0.850696	0
Physical and Mathematical Sciences	Geophysics	3	14.4846	12	5.95062	4	0.0679012	0	0.237654	0
Physical and Mathematical Sciences	Geophysics	5	21.1852	17	6.86728	4	0.132716	0	0.42284	0
Physical and Mathematical Sciences	Geophysics	10	32.2037	25	8.46605	4	0.42284	0	0.737654	0
Physical and Mathematical Sciences	Information Science/Studies	3	7.27114	4	5.92703	2	0.222222	0	0.670813	0
Physical and Mathematical Sciences	Information Science/Studies	5	10.3184	7	8.71227	3	0.342454	0	1.07463	0
Physical and Mathematical Sciences	Information Science/Studies	10	15.0473	10	13.9983	6.5	0.856551	0	2.17413	0
Physical and Mathematical Sciences	Information Technology/Information Systems	3	6.66537	3	4.01366	1	0.198049	0	0.412683	0
Physical and Mathematical Sciences	Information Technology/Information Systems	5	9.44683	5	5.82732	1	0.294634	0	0.69561	0
Physical and Mathematical Sciences	Information Technology/Information Systems	10	14.1356	8	9.01561	2	0.773659	0	1.4478	0
Physical and Mathematical Sciences	Marine Sciences	3	15.7463	12	0.983319	0	0.0658472	0	0.411765	0
Physical and Mathematical Sciences	Marine Sciences	5	23.0342	18	1.21773	0	0.0992098	0	0.608428	0
Physical and Mathematical Sciences	Marine Sciences	10	35.5549	27	1.7849	0	0.287094	0	1.03687	0
Physical and Mathematical Sciences	Mathematics	3	6.94335	5	0.67579	0	0.164813	0	0.206089	0
Physical and Mathematical Sciences	Mathematics	5	10.24	7	1.04494	0	0.246926	0	0.367828	0
Physical and Mathematical Sciences	Mathematics	10	16.0448	11	1.79289	0	0.7137	0	0.818355	0
Physical and Mathematical Sciences	Oceanography, Physical Sciences	3	16.6294	12	1.07412	0	0.0808625	0	0.354447	0
Physical and Mathematical Sciences	Oceanography, Physical Sciences	5	24.442	19	1.43531	0	0.118598	0	0.52965	0
Physical and Mathematical Sciences	Oceanography, Physical Sciences	10	38.2574	28	2.30593	0	0.37062	0	0.940701	0
Physical and Mathematical Sciences	Physics, General	3	42.889	13	2.15515	0	0.0721861	0	0.164728	0
Physical and Mathematical Sciences	Physics, General	5	61.6228	20	3.28464	1	0.115977	0	0.287034	0
Physical and Mathematical Sciences	Physics, General	10	96.7251	33	5.96904	2	0.363154	0	0.635477	0
Physical and Mathematical Sciences	Statistics	3	9.06922	6	0.743449	0	0.148221	0	0.22761	0
Physical and Mathematical Sciences	Statistics	5	13.3246	9	1.11459	0	0.218616	0	0.402034	0
Physical and Mathematical Sciences	Statistics	10	20.7712	13	1.89675	0	0.594447	0	0.814235	0
Social and Behavioral Sciences	Anthropology	3	5.29899	3	0.116198	0	0.46514	0	1.5529	1
Social and Behavioral Sciences	Anthropology	5	7.76413	5	0.132848	0	0.706556	0	2.4419	1
Social and Behavioral Sciences	Anthropology	10	11.8467	8	0.163025	0	1.73985	1	4.17274	3
Social and Behavioral Sciences	Applied Economics	3	7.3245	5	0.18543	0	0.165563	0	0.675497	0
Social and Behavioral Sciences	Applied Economics	5	10.7616	7.5	0.281457	0	0.271523	0	1.28477	0
Social and Behavioral Sciences	Applied Economics	10	17.351	12	0.433775	0	0.728477	0	2.13576	1
Social and Behavioral Sciences	Clinical Psychology	3	14.9706	11	0.120321	0	0.237968	0	1.38503	0
Social and Behavioral Sciences	Clinical Psychology	5	22.4251	17	0.152406	0	0.360963	0	2.30749	1
Social and Behavioral Sciences	Clinical Psychology	10	34.6524	26	0.280749	0	0.823529	0	4.0615	2
Social and Behavioral Sciences	Counseling Psychology	3	8.40694	6	0.0630915	0	0.29653	0	1.34858	0
Social and Behavioral Sciences	Counseling Psychology	5	11.9953	8	0.100946	0	0.432177	0	2.05363	1
Social and Behavioral Sciences	Counseling Psychology	10	17.6073	12	0.15142	0	0.927445	0	3.47476	2
Social and Behavioral Sciences	Criminal Justice and Criminology	3	7.05254	5	0.0587711	0	0.476402	0	1.44167	0
Social and Behavioral Sciences	Criminal Justice and Criminology	5	9.90383	7	0.0739092	0	0.707925	0	2.27961	1
Social and Behavioral Sciences	Criminal Justice and Criminology	10	14.5325	10	0.0988424	0	1.67231	0	3.7854	2
Social and Behavioral Sciences	Economics, General	3	5.15876	3	0.0616789	0	0.201737	0	0.637943	0
Social and Behavioral Sciences	Economics, General	5	7.86395	5	0.0939657	0	0.316188	0	1.12091	0
Social and Behavioral Sciences	Economics, General	10	12.9071	9	0.148074	0	0.873302	0	2.19817	0
Social and Behavioral Sciences	Educational Psychology	3	8.24602	6	0.226549	0	0.310619	0	1.35487	0.5
Social and Behavioral Sciences	Educational Psychology	5	11.7398	8	0.325664	0	0.484071	0	2.10973	1
Social and Behavioral Sciences	Educational Psychology	10	17.1204	12	0.462832	0	1.01947	0	3.47611	2
Social and Behavioral Sciences	Geography	3	10.049	7	0.861438	0	0.298693	0	1.05556	0
Social and Behavioral Sciences	Geography	5	14.5451	10	0.994771	0	0.430065	0	1.62288	0
Social and Behavioral Sciences	Geography	10	21.5464	15	1.35294	0	0.993464	0	2.64379	1
Social and Behavioral Sciences	International Affairs and Development	3	4.32773	3	0.151261	0	0.714286	0	1.78151	1
Social and Behavioral Sciences	International Affairs and Development	5	6.4902	4	0.210784	0	1.07773	0	2.88655	1
Social and Behavioral Sciences	International Affairs and Development	10	10.4174	7	0.278711	0	2.63445	1	5.32213	2
Social and Behavioral Sciences	Political Science	3	4.43147	3	0.0551016	0	0.607518	0	1.34812	0
Social and Behavioral Sciences	Political Science	5	6.50876	4	0.0733131	0	0.898202	0	2.14429	1
Social and Behavioral Sciences	Political Science	10	9.97759	7	0.0992295	0	2.16577	1	3.887	2
Social and Behavioral Sciences	Psychology, General	3	13.9815	10	0.332718	0	0.23381	0	1.29826	0
Social and Behavioral Sciences	Psychology, General	5	20.5327	14	0.485925	0	0.353946	0	2.16782	1
Social and Behavioral Sciences	Psychology, General	10	31.441	22	0.745578	0	0.896324	0	3.90509	2
Social and Behavioral Sciences	Psychology, various	3	13.6643	9	0.179396	0	0.230906	0	1.18117	0
Social and Behavioral Sciences	Psychology, various	5	20.3552	14	0.248668	0	0.335702	0	1.96803	1
Social and Behavioral Sciences	Psychology, various	10	31.0462	21	0.454707	0	0.907638	0	3.5897	1
Social and Behavioral Sciences	Public Administration	3	5.91795	4	0.268075	0	0.464663	0	1.2437	0
Social and Behavioral Sciences	Public Administration	5	8.51828	5	0.405361	0	0.717303	0	2.01543	1
Social and Behavioral Sciences	Public Administration	10	13.0292	9	0.575142	0	1.69943	0	3.72136	1
Social and Behavioral Sciences	Public Policy	3	7.60572	4	0.318003	0	0.482894	0	1.37745	0
Social and Behavioral Sciences	Public Policy	5	11.1621	7	0.472799	0	0.719013	0	2.28716	1
Social and Behavioral Sciences	Public Policy	10	17.3096	10	0.692653	0	1.84577	0	4.40662	2
Social and Behavioral Sciences	School Psychology	3	9.76543	7	0.180247	0	0.254321	0	1.30123	1
Social and Behavioral Sciences	School Psychology	5	13.8296	10	0.306173	0	0.365432	0	1.98519	1
Social and Behavioral Sciences	School Psychology	10	20.1605	15	0.395062	0	0.841975	0	3.57037	2
Social and Behavioral Sciences	Social Sciences, various	3	5.71554	3	0.394428	0	0.36217	0	1.23314	0
Social and Behavioral Sciences	Social Sciences, various	5	8.56745	5	0.589443	0	0.568915	0	2.0044	1
Social and Behavioral Sciences	Social Sciences, various	10	13.2757	7	0.920821	0	1.39589	0	3.51173	1.5
Social and Behavioral Sciences	Social Work/Social Welfare	3	8.46487	5	0.0499337	0	0.220062	0	0.827662	0
Social and Behavioral Sciences	Social Work/Social Welfare	5	11.8109	8	0.0600972	0	0.335837	0	1.37163	0
Social and Behavioral Sciences	Social Work/Social Welfare	10	17.0009	12	0.0751215	0	0.808219	0	2.24481	1
Social and Behavioral Sciences	Sociology	3	5.82134	4	0.0931604	0	0.456368	0	1.52182	1
Social and Behavioral Sciences	Sociology	5	8.41863	6	0.122347	0	0.680425	0	2.43721	1
Social and Behavioral Sciences	Sociology	10	12.7158	9	0.170401	0	1.59847	1	4.18691	2
