# Supplementary material for: The Rhythms of Scholarly Publication: Suggestions to Enhance Bibliometric Comparisons Across Disciplines
Source: Front Res Metr Anal. 2022 Jan 25;7:812312. doi: 10.3389/frma.2022.812312 (PMC8821823; doi:10.3389/frma.2022.812312)
Supplement: Supplementary file 3 [file Table_3.XLSX]

## Sheet: Table 3
Supplemental Table 3. Rate of participation in each publishing modality in each discipine over the most recent 3-, 5-, and 10-year timeframes (ending in 2019).
Broad Field	Discipline	Timeframe (years)	# Faculty w/ Article	% Faculty w/ Article	# Faculty w/ Conference Proceeding	% Faculty w/ Conference Proceeding	# Faculty w/ Book	% Faculty w/ Book	# Faculty w/ Chapter	% Faculty w Chapter
Agricultural Sciences	Agricultural Economics	3	674	0.902276	47	0.0629183	59	0.0789826	186	0.248996
Agricultural Sciences	Agricultural Economics	5	697	0.933066	63	0.0843373	85	0.113788	262	0.350736
Agricultural Sciences	Agricultural Economics	10	717	0.959839	85	0.113788	154	0.206158	316	0.423025
Agricultural Sciences	Agriculture, various	3	221	0.8125	38	0.139706	21	0.0772059	53	0.194853
Agricultural Sciences	Agriculture, various	5	227	0.834559	49	0.180147	25	0.0919118	69	0.253676
Agricultural Sciences	Agriculture, various	10	243	0.893382	64	0.235294	36	0.132353	76	0.279412
Agricultural Sciences	Agronomy and Crop Science	3	751	0.957908	140	0.178571	34	0.0433673	187	0.23852
Agricultural Sciences	Agronomy and Crop Science	5	760	0.969388	171	0.218112	58	0.0739796	242	0.308673
Agricultural Sciences	Agronomy and Crop Science	10	767	0.978316	242	0.308673	95	0.121173	325	0.414541
Agricultural Sciences	Animal Sciences	3	1138	0.93817	90	0.0741962	53	0.0436933	241	0.198681
Agricultural Sciences	Animal Sciences	5	1159	0.955482	106	0.0873866	67	0.055235	311	0.256389
Agricultural Sciences	Animal Sciences	10	1184	0.976092	193	0.15911	127	0.104699	466	0.384171
Agricultural Sciences	Food Science	3	821	0.938286	60	0.0685714	68	0.0777143	214	0.244571
Agricultural Sciences	Food Science	5	835	0.954286	74	0.0845714	92	0.105143	299	0.341714
Agricultural Sciences	Food Science	10	850	0.971429	124	0.141714	170	0.194286	403	0.460571
Agricultural Sciences	Horticulture	3	529	0.901193	189	0.321976	35	0.0596252	113	0.192504
Agricultural Sciences	Horticulture	5	542	0.923339	213	0.362862	45	0.076661	157	0.267462
Agricultural Sciences	Horticulture	10	558	0.950596	264	0.449744	84	0.143101	213	0.362862
Agricultural Sciences	Plant Sciences	3	942	0.945783	155	0.155622	59	0.0592369	215	0.215863
Agricultural Sciences	Plant Sciences	5	954	0.957831	194	0.194779	84	0.0843373	305	0.306225
Agricultural Sciences	Plant Sciences	10	969	0.972892	270	0.271084	152	0.15261	422	0.423695
Agricultural Sciences	Soil Science	3	733	0.947028	137	0.177003	40	0.0516796	187	0.241602
Agricultural Sciences	Soil Science	5	747	0.965116	162	0.209302	65	0.0839793	254	0.328165
Agricultural Sciences	Soil Science	10	753	0.972868	234	0.302326	109	0.140827	331	0.427649
Biological and Biomedical Sciences	Anatomy	3	883	0.908436	151	0.15535	49	0.0504115	223	0.229424
Biological and Biomedical Sciences	Anatomy	5	911	0.937243	171	0.175926	76	0.0781893	319	0.328189
Biological and Biomedical Sciences	Anatomy	10	934	0.960905	227	0.233539	134	0.13786	445	0.457819
Biological and Biomedical Sciences	Biochemistry	3	3956	0.946185	585	0.139919	218	0.0521406	932	0.222913
Biological and Biomedical Sciences	Biochemistry	5	4043	0.966994	695	0.166228	288	0.068883	1374	0.32863
Biological and Biomedical Sciences	Biochemistry	10	4102	0.981105	1033	0.24707	604	0.144463	1917	0.458503
Biological and Biomedical Sciences	Bioinformatics and Computational Biology	3	615	0.971564	247	0.390205	43	0.0679305	154	0.243286
Biological and Biomedical Sciences	Bioinformatics and Computational Biology	5	621	0.981043	268	0.423381	54	0.0853081	229	0.361769
Biological and Biomedical Sciences	Bioinformatics and Computational Biology	10	628	0.992101	334	0.527646	106	0.167457	300	0.473934
Biological and Biomedical Sciences	Biological Sciences, various	3	232	0.958678	50	0.206612	21	0.0867769	49	0.202479
Biological and Biomedical Sciences	Biological Sciences, various	5	237	0.979339	52	0.214876	26	0.107438	72	0.297521
Biological and Biomedical Sciences	Biological Sciences, various	10	240	0.991736	61	0.252066	41	0.169421	107	0.442149
Biological and Biomedical Sciences	Biology/Biological Sciences, General	3	5598	0.921481	784	0.129053	296	0.0487243	1156	0.190288
Biological and Biomedical Sciences	Biology/Biological Sciences, General	5	5745	0.945679	914	0.150453	434	0.0714403	1708	0.281152
Biological and Biomedical Sciences	Biology/Biological Sciences, General	10	5893	0.970041	1208	0.198848	866	0.142551	2466	0.405926
Biological and Biomedical Sciences	Biomedical Sciences, General	3	1023	0.900528	158	0.139085	53	0.0466549	236	0.207746
Biological and Biomedical Sciences	Biomedical Sciences, General	5	1057	0.930458	191	0.168134	77	0.0677817	322	0.283451
Biological and Biomedical Sciences	Biomedical Sciences, General	10	1080	0.950704	235	0.206866	139	0.122359	453	0.398768
Biological and Biomedical Sciences	Biomedical Sciences, various	3	596	0.93125	129	0.201563	42	0.065625	181	0.282813
Biological and Biomedical Sciences	Biomedical Sciences, various	5	610	0.953125	145	0.226562	50	0.078125	239	0.373437
Biological and Biomedical Sciences	Biomedical Sciences, various	10	622	0.971875	193	0.301563	95	0.148438	304	0.475
Biological and Biomedical Sciences	Biophysics	3	894	0.939076	119	0.125	56	0.0588235	222	0.233193
Biological and Biomedical Sciences	Biophysics	5	910	0.955882	147	0.154412	73	0.0766807	323	0.339286
Biological and Biomedical Sciences	Biophysics	10	933	0.980042	224	0.235294	140	0.147059	468	0.491597
Biological and Biomedical Sciences	Botany/Plant Biology	3	436	0.964602	62	0.137168	32	0.0707965	120	0.265487
Biological and Biomedical Sciences	Botany/Plant Biology	5	444	0.982301	80	0.176991	42	0.0929204	176	0.389381
Biological and Biomedical Sciences	Botany/Plant Biology	10	447	0.988938	110	0.243363	90	0.199115	236	0.522124
Biological and Biomedical Sciences	Cell Biology	3	2576	0.940146	389	0.141971	122	0.0445255	620	0.226277
Biological and Biomedical Sciences	Cell Biology	5	2633	0.960949	457	0.166788	180	0.0656934	926	0.337956
Biological and Biomedical Sciences	Cell Biology	10	2675	0.976277	612	0.223358	358	0.130657	1310	0.478102
Biological and Biomedical Sciences	Cognitive Science	3	523	0.961397	157	0.288603	63	0.115809	232	0.426471
Biological and Biomedical Sciences	Cognitive Science	5	527	0.96875	181	0.332721	97	0.178309	301	0.553309
Biological and Biomedical Sciences	Cognitive Science	10	536	0.985294	224	0.411765	181	0.332721	382	0.702206
Biological and Biomedical Sciences	Developmental Biology	3	676	0.957507	90	0.127479	34	0.0481586	189	0.267705
Biological and Biomedical Sciences	Developmental Biology	5	685	0.970255	108	0.152975	43	0.0609065	264	0.373938
Biological and Biomedical Sciences	Developmental Biology	10	692	0.98017	150	0.212465	105	0.148725	358	0.507082
Biological and Biomedical Sciences	Ecology	3	945	0.983351	163	0.169615	80	0.0832466	235	0.244537
Biological and Biomedical Sciences	Ecology	5	948	0.986472	183	0.190427	123	0.127992	350	0.364204
Biological and Biomedical Sciences	Ecology	10	953	0.991675	228	0.237253	248	0.258065	499	0.519251
Biological and Biomedical Sciences	Entomology	3	677	0.968526	346	0.494993	44	0.0629471	205	0.293276
Biological and Biomedical Sciences	Entomology	5	686	0.981402	361	0.516452	64	0.0915594	256	0.366237
Biological and Biomedical Sciences	Entomology	10	692	0.989986	374	0.53505	130	0.18598	341	0.48784
Biological and Biomedical Sciences	Epidemiology	3	1628	0.984876	491	0.297036	98	0.0592861	415	0.251059
Biological and Biomedical Sciences	Epidemiology	5	1633	0.987901	523	0.316394	142	0.0859044	542	0.327889
Biological and Biomedical Sciences	Epidemiology	10	1640	0.992136	623	0.376891	254	0.15366	733	0.443436
Biological and Biomedical Sciences	Evolutionary Biology	3	793	0.981436	128	0.158416	88	0.108911	233	0.288366
Biological and Biomedical Sciences	Evolutionary Biology	5	797	0.986386	147	0.181931	128	0.158416	334	0.413366
Biological and Biomedical Sciences	Evolutionary Biology	10	802	0.992574	182	0.225248	234	0.289604	467	0.57797
Biological and Biomedical Sciences	Genetics	3	940	0.977131	189	0.196466	52	0.0540541	270	0.280665
Biological and Biomedical Sciences	Genetics	5	947	0.984407	204	0.212058	72	0.0748441	359	0.373181
Biological and Biomedical Sciences	Genetics	10	954	0.991684	290	0.301455	142	0.147609	485	0.504158
Biological and Biomedical Sciences	Human and Medical Genetics	3	522	0.986767	103	0.194707	31	0.0586011	147	0.277883
Biological and Biomedical Sciences	Human and Medical Genetics	5	525	0.992439	118	0.223062	49	0.0926276	197	0.372401
Biological and Biomedical Sciences	Human and Medical Genetics	10	529	1	152	0.287335	84	0.15879	258	0.487713
Biological and Biomedical Sciences	Immunology	3	1897	0.956149	317	0.159778	108	0.0544355	514	0.259073
Biological and Biomedical Sciences	Immunology	5	1924	0.969758	337	0.169859	147	0.0740927	734	0.36996
Biological and Biomedical Sciences	Immunology	10	1945	0.980343	461	0.232359	286	0.144153	1010	0.509073
Biological and Biomedical Sciences	Microbiology	3	2737	0.961363	388	0.136284	136	0.0477696	661	0.232174
Biological and Biomedical Sciences	Microbiology	5	2782	0.977169	422	0.148226	203	0.0713031	1009	0.354408
Biological and Biomedical Sciences	Microbiology	10	2809	0.986653	594	0.208641	407	0.142957	1426	0.500878
Biological and Biomedical Sciences	Molecular Biology	3	2459	0.954581	355	0.137811	132	0.0512422	582	0.225932
Biological and Biomedical Sciences	Molecular Biology	5	2507	0.973214	416	0.161491	182	0.0706522	888	0.34472
Biological and Biomedical Sciences	Molecular Biology	10	2538	0.985248	577	0.223991	374	0.145186	1235	0.479425
Biological and Biomedical Sciences	Molecular Genetics	3	787	0.96802	110	0.135301	33	0.0405904	203	0.249692
Biological and Biomedical Sciences	Molecular Genetics	5	797	0.98032	124	0.152522	55	0.0676507	286	0.351784
Biological and Biomedical Sciences	Molecular Genetics	10	804	0.98893	168	0.206642	103	0.126691	391	0.480935
Biological and Biomedical Sciences	Molecular Pharmacology	3	366	0.96063	77	0.2021	30	0.0787402	113	0.296588
Biological and Biomedical Sciences	Molecular Pharmacology	5	374	0.981627	88	0.230971	42	0.110236	150	0.393701
Biological and Biomedical Sciences	Molecular Pharmacology	10	378	0.992126	109	0.286089	77	0.2021	198	0.519685
Biological and Biomedical Sciences	Neurobiology/Neuroscience	3	2205	0.960784	301	0.131155	154	0.0671024	633	0.275817
Biological and Biomedical Sciences	Neurobiology/Neuroscience	5	2237	0.974728	374	0.162963	218	0.0949891	928	0.404357
Biological and Biomedical Sciences	Neurobiology/Neuroscience	10	2266	0.987364	479	0.208715	407	0.177342	1249	0.544227
Biological and Biomedical Sciences	Oncology and Cancer Biology	3	519	0.982955	167	0.316288	25	0.0473485	126	0.238636
Biological and Biomedical Sciences	Oncology and Cancer Biology	5	523	0.99053	176	0.333333	31	0.0587121	172	0.325758
Biological and Biomedical Sciences	Oncology and Cancer Biology	10	524	0.992424	207	0.392045	67	0.126894	259	0.49053
Biological and Biomedical Sciences	Oral Biology and Craniofacial Science	3	181	0.942708	17	0.0885417	9	0.046875	50	0.260417
Biological and Biomedical Sciences	Oral Biology and Craniofacial Science	5	185	0.963542	27	0.140625	15	0.078125	68	0.354167
Biological and Biomedical Sciences	Oral Biology and Craniofacial Science	10	186	0.96875	36	0.1875	26	0.135417	110	0.572917
Biological and Biomedical Sciences	Pathology	3	3080	0.93674	562	0.170925	212	0.0644769	859	0.261253
Biological and Biomedical Sciences	Pathology	5	3148	0.957421	611	0.185827	270	0.0821168	1186	0.360706
Biological and Biomedical Sciences	Pathology	10	3203	0.974148	789	0.239964	474	0.144161	1533	0.466241
Biological and Biomedical Sciences	Pharmaceutical Sciences	3	1386	0.932705	216	0.145357	86	0.0578735	401	0.269852
Biological and Biomedical Sciences	Pharmaceutical Sciences	5	1428	0.960969	249	0.167564	130	0.0874832	536	0.3607
Biological and Biomedical Sciences	Pharmaceutical Sciences	10	1451	0.976447	348	0.234186	220	0.148048	712	0.479139
Biological and Biomedical Sciences	Pharmacology	3	1904	0.9501	340	0.169661	108	0.0538922	511	0.25499
Biological and Biomedical Sciences	Pharmacology	5	1940	0.968064	377	0.188124	158	0.0788423	753	0.375749
Biological and Biomedical Sciences	Pharmacology	10	1972	0.984032	510	0.254491	320	0.159681	996	0.497006
Biological and Biomedical Sciences	Physiology, General	3	2110	0.938612	256	0.113879	101	0.0449288	504	0.224199
Biological and Biomedical Sciences	Physiology, General	5	2149	0.955961	316	0.140569	156	0.069395	733	0.326068
Biological and Biomedical Sciences	Physiology, General	10	2191	0.974644	476	0.211744	305	0.135676	1037	0.461299
Biological and Biomedical Sciences	Plant Pathology	3	655	0.980539	115	0.172156	26	0.0389222	163	0.244012
Biological and Biomedical Sciences	Plant Pathology	5	660	0.988024	151	0.226048	45	0.0673653	221	0.330838
Biological and Biomedical Sciences	Plant Pathology	10	664	0.994012	201	0.300898	96	0.143713	303	0.453593
Biological and Biomedical Sciences	Structural Biology	3	125	0.93985	17	0.12782	8	0.0601504	25	0.18797
Biological and Biomedical Sciences	Structural Biology	5	127	0.954887	24	0.180451	9	0.0676692	39	0.293233
Biological and Biomedical Sciences	Structural Biology	10	131	0.984962	37	0.278195	18	0.135338	59	0.443609
Biological and Biomedical Sciences	Toxicology	3	457	0.948133	64	0.13278	28	0.0580913	109	0.226141
Biological and Biomedical Sciences	Toxicology	5	467	0.96888	70	0.145228	41	0.0850622	162	0.3361
Biological and Biomedical Sciences	Toxicology	10	477	0.989627	102	0.211618	82	0.170124	217	0.450207
Biological and Biomedical Sciences	Zoology	3	175	0.956284	22	0.120219	10	0.0546448	35	0.191257
Biological and Biomedical Sciences	Zoology	5	178	0.972678	26	0.142077	13	0.0710383	48	0.262295
Biological and Biomedical Sciences	Zoology	10	178	0.972678	33	0.180328	22	0.120219	85	0.464481
Business	Accounting	3	1528	0.748653	59	0.0289074	130	0.0636943	141	0.0690838
Business	Accounting	5	1651	0.808917	90	0.044096	151	0.0739833	208	0.101911
Business	Accounting	10	1762	0.863302	121	0.0592847	258	0.126409	333	0.163155
Business	Business Administration	3	2003	0.830087	619	0.256527	209	0.0866142	557	0.230833
Business	Business Administration	5	2127	0.881475	751	0.311231	280	0.116038	751	0.311231
Business	Business Administration	10	2213	0.917116	845	0.350186	491	0.203481	1017	0.421467
Business	Business, various	3	1961	0.830229	645	0.273074	312	0.132091	617	0.261219
Business	Business, various	5	2067	0.875106	769	0.325572	390	0.165114	834	0.353091
Business	Business, various	10	2164	0.916173	849	0.359441	588	0.248942	1043	0.441575
Business	Finance	3	1778	0.808917	71	0.0323021	113	0.0514104	238	0.10828
Business	Finance	5	1894	0.861692	91	0.0414013	160	0.0727934	358	0.162875
Business	Finance	10	1984	0.902639	118	0.0536852	293	0.133303	560	0.254777
Business	Management	3	2877	0.850932	1639	0.484768	407	0.120379	958	0.283348
Business	Management	5	3028	0.895593	1869	0.552795	532	0.15735	1275	0.377107
Business	Management	10	3158	0.934043	2017	0.596569	834	0.246673	1694	0.501035
Business	Management Information Systems	3	1023	0.839212	376	0.30845	92	0.0754717	182	0.149303
Business	Management Information Systems	5	1065	0.873667	464	0.38064	124	0.101723	256	0.210008
Business	Management Information Systems	10	1116	0.915505	552	0.45283	248	0.203445	421	0.345365
Business	Marketing	3	1464	0.835616	435	0.248288	143	0.081621	513	0.292808
Business	Marketing	5	1553	0.886416	677	0.386416	215	0.122717	679	0.387557
Business	Marketing	10	1622	0.925799	728	0.415525	346	0.197489	874	0.498858
Education	Counselor Education	3	827	0.806829	46	0.044878	173	0.16878	399	0.389268
Education	Counselor Education	5	875	0.853659	52	0.0507317	227	0.221463	480	0.468293
Education	Counselor Education	10	916	0.893659	63	0.0614634	319	0.31122	575	0.560976
Education	Curriculum and Instruction	3	1606	0.766953	177	0.0845272	513	0.244986	1085	0.518147
Education	Curriculum and Instruction	5	1740	0.830946	196	0.0936008	645	0.308023	1255	0.599331
Education	Curriculum and Instruction	10	1865	0.89064	226	0.107927	906	0.432665	1425	0.680516
Education	Education, General	3	1665	0.772981	198	0.091922	522	0.24234	1046	0.485608
Education	Education, General	5	1803	0.837047	228	0.10585	639	0.296657	1210	0.561746
Education	Education, General	10	1896	0.880223	272	0.126277	891	0.413649	1382	0.641597
Education	Educational Evaluation and Research	3	265	0.854839	29	0.0935484	86	0.277419	168	0.541935
Education	Educational Evaluation and Research	5	281	0.906452	39	0.125806	104	0.335484	196	0.632258
Education	Educational Evaluation and Research	10	290	0.935484	47	0.151613	143	0.46129	219	0.706452
Education	Educational Leadership and Administration	3	1525	0.766717	114	0.0573152	525	0.263952	995	0.500251
Education	Educational Leadership and Administration	5	1636	0.822524	135	0.0678733	664	0.333836	1190	0.598291
Education	Educational Leadership and Administration	10	1733	0.871292	170	0.0854701	903	0.453997	1327	0.667169
Education	Foundations of Education	3	331	0.78436	30	0.07109	111	0.263033	217	0.514218
Education	Foundations of Education	5	354	0.838863	33	0.0781991	140	0.331754	258	0.611374
Education	Foundations of Education	10	376	0.890995	42	0.0995261	192	0.454976	294	0.696682
Education	Higher Education/Higher Education Administration	3	276	0.849231	20	0.0615385	91	0.28	182	0.56
Education	Higher Education/Higher Education Administration	5	287	0.883077	22	0.0676923	110	0.338462	206	0.633846
Education	Higher Education/Higher Education Administration	10	304	0.935385	25	0.0769231	151	0.464615	224	0.689231
Education	Mathematics Education	3	134	0.788235	22	0.129412	33	0.194118	60	0.352941
Education	Mathematics Education	5	145	0.852941	27	0.158824	42	0.247059	71	0.417647
Education	Mathematics Education	10	151	0.888235	33	0.194118	54	0.317647	87	0.511765
Education	Science Education	3	99	0.773438	15	0.117188	30	0.234375	52	0.40625
Education	Science Education	5	108	0.84375	19	0.148438	38	0.296875	62	0.484375
Education	Science Education	10	112	0.875	25	0.195312	48	0.375	74	0.578125
Education	Special Education	3	640	0.812183	39	0.0494924	126	0.159898	315	0.399746
Education	Special Education	5	679	0.861675	47	0.0596447	160	0.203046	378	0.479695
Education	Special Education	10	720	0.913706	58	0.0736041	260	0.329949	464	0.588832
Education	Teacher Education Specific Levels	3	703	0.710819	83	0.0839232	204	0.206269	431	0.435794
Education	Teacher Education Specific Levels	5	758	0.766431	95	0.0960566	257	0.259858	508	0.51365
Education	Teacher Education Specific Levels	10	821	0.830131	103	0.104146	368	0.372093	599	0.605662
Education	Teacher Education Specific Subject Areas	3	766	0.730219	78	0.0743565	218	0.207817	418	0.398475
Education	Teacher Education Specific Subject Areas	5	820	0.781697	86	0.0819828	267	0.254528	495	0.471878
Education	Teacher Education Specific Subject Areas	10	882	0.840801	106	0.101049	378	0.360343	569	0.542421
Engineering	Aerospace Engineering	3	1631	0.902601	1371	0.758716	169	0.0935252	277	0.153293
Engineering	Aerospace Engineering	5	1680	0.929718	1474	0.815717	229	0.126729	421	0.232983
Engineering	Aerospace Engineering	10	1714	0.948533	1608	0.889873	420	0.232429	662	0.366353
Engineering	Agricultural/Biological Engineering and Bioengineering	3	1908	0.962179	808	0.407463	153	0.0771558	548	0.276349
Engineering	Agricultural/Biological Engineering and Bioengineering	5	1930	0.973273	933	0.470499	200	0.100857	731	0.368633
Engineering	Agricultural/Biological Engineering and Bioengineering	10	1948	0.98235	1204	0.607161	417	0.210287	1002	0.505295
Engineering	Biomedical Engineering	3	1908	0.971982	960	0.489047	136	0.0692817	568	0.289353
Engineering	Biomedical Engineering	5	1926	0.981151	1117	0.569027	196	0.0998472	807	0.411105
Engineering	Biomedical Engineering	10	1943	0.989812	1394	0.710138	391	0.199185	1066	0.543046
Engineering	Chemical Engineering	3	2271	0.943498	784	0.325717	185	0.0768592	547	0.227254
Engineering	Chemical Engineering	5	2305	0.957624	963	0.400083	249	0.103448	762	0.316577
Engineering	Chemical Engineering	10	2348	0.975488	1191	0.494807	511	0.212297	1054	0.437889
Engineering	Civil Engineering	3	3126	0.927046	1879	0.557236	250	0.07414	608	0.180308
Engineering	Civil Engineering	5	3198	0.948399	2148	0.637011	332	0.0984579	850	0.252076
Engineering	Civil Engineering	10	3257	0.965896	2484	0.736655	733	0.217378	1277	0.378707
Engineering	Computer Engineering	3	4419	0.893088	4390	0.887227	505	0.102061	1016	0.205335
Engineering	Computer Engineering	5	4579	0.925424	4555	0.920574	683	0.138036	1435	0.290016
Engineering	Computer Engineering	10	4711	0.952102	4708	0.951496	1509	0.304972	2218	0.448262
Engineering	Electrical Engineering	3	5053	0.901838	4927	0.87935	589	0.105122	1122	0.20025
Engineering	Electrical Engineering	5	5215	0.930751	5130	0.915581	790	0.140996	1579	0.281813
Engineering	Electrical Engineering	10	5356	0.955916	5319	0.949313	1751	0.312511	2429	0.433518
Engineering	Engineering Mechanics	3	308	0.916667	222	0.660714	29	0.0863095	59	0.175595
Engineering	Engineering Mechanics	5	312	0.928571	247	0.735119	32	0.0952381	87	0.258929
Engineering	Engineering Mechanics	10	320	0.952381	285	0.848214	78	0.232143	133	0.395833
Engineering	Engineering, General	3	411	0.825301	317	0.636546	50	0.100402	95	0.190763
Engineering	Engineering, General	5	429	0.861446	348	0.698795	58	0.116466	136	0.273092
Engineering	Engineering, General	10	444	0.891566	395	0.793173	122	0.24498	193	0.38755
Engineering	Engineering, various	3	1333	0.810334	1007	0.612158	136	0.0826748	271	0.164742
Engineering	Engineering, various	5	1392	0.846201	1104	0.671125	187	0.113678	409	0.248632
Engineering	Engineering, various	10	1435	0.87234	1217	0.739818	339	0.206079	571	0.347112
Engineering	Environmental Engineering	3	2588	0.935986	1424	0.515009	202	0.0730561	511	0.18481
Engineering	Environmental Engineering	5	2642	0.955515	1653	0.59783	282	0.101989	727	0.262929
Engineering	Environmental Engineering	10	2682	0.969982	1930	0.698011	620	0.224231	1097	0.396745
Engineering	Geological and Mining Engineering	3	313	0.945619	217	0.655589	23	0.0694864	36	0.108761
Engineering	Geological and Mining Engineering	5	319	0.963746	234	0.706949	30	0.0906344	56	0.169184
Engineering	Geological and Mining Engineering	10	326	0.984894	252	0.761329	64	0.193353	100	0.302115
Engineering	Industrial Engineering	3	1169	0.916144	776	0.60815	92	0.0721003	205	0.160658
Engineering	Industrial Engineering	5	1200	0.940439	883	0.692006	130	0.101881	307	0.240596
Engineering	Industrial Engineering	10	1230	0.96395	1016	0.796238	269	0.210815	473	0.37069
Engineering	Materials Engineering	3	435	0.927505	259	0.552239	44	0.0938166	113	0.240938
Engineering	Materials Engineering	5	445	0.948827	298	0.635394	57	0.121535	138	0.294243
Engineering	Materials Engineering	10	452	0.963753	350	0.746269	118	0.251599	190	0.405117
Engineering	Materials Science and Engineering	3	1610	0.966967	841	0.505105	147	0.0882883	405	0.243243
Engineering	Materials Science and Engineering	5	1627	0.977177	984	0.590991	222	0.133333	560	0.336336
Engineering	Materials Science and Engineering	10	1643	0.986787	1154	0.693093	448	0.269069	770	0.462462
Engineering	Mechanical Engineering	3	4460	0.924544	3366	0.697761	408	0.0845771	838	0.173715
Engineering	Mechanical Engineering	5	4567	0.946725	3716	0.770315	564	0.116915	1182	0.245025
Engineering	Mechanical Engineering	10	4653	0.964552	4194	0.869403	1016	0.210614	1802	0.373549
Engineering	Nuclear Engineering	3	319	0.95509	191	0.571856	31	0.0928144	51	0.152695
Engineering	Nuclear Engineering	5	321	0.961078	218	0.652695	39	0.116766	70	0.209581
Engineering	Nuclear Engineering	10	326	0.976048	242	0.724551	62	0.185629	117	0.350299
Engineering	Operations Research	3	748	0.872812	312	0.364061	81	0.0945158	121	0.14119
Engineering	Operations Research	5	776	0.905484	366	0.427071	102	0.11902	178	0.207701
Engineering	Operations Research	10	809	0.943991	445	0.519253	191	0.22287	278	0.324387
Engineering	Systems Engineering	3	800	0.913242	580	0.6621	74	0.0844749	169	0.192922
Engineering	Systems Engineering	5	832	0.949772	636	0.726027	108	0.123288	251	0.28653
Engineering	Systems Engineering	10	852	0.972603	720	0.821918	227	0.259132	366	0.417808
Family, Consumer and Human Sciences	Architecture	3	772	0.423943	325	0.178473	362	0.198792	432	0.237232
Family, Consumer and Human Sciences	Architecture	5	887	0.487095	386	0.211971	480	0.263591	533	0.292696
Family, Consumer and Human Sciences	Architecture	10	1063	0.583745	478	0.262493	707	0.388248	656	0.360242
Family, Consumer and Human Sciences	Architecture, Design, Planning, various	3	645	0.489749	195	0.148064	189	0.143508	278	0.211086
Family, Consumer and Human Sciences	Architecture, Design, Planning, various	5	730	0.55429	224	0.170084	236	0.179195	346	0.262718
Family, Consumer and Human Sciences	Architecture, Design, Planning, various	10	817	0.620349	268	0.203493	369	0.280182	417	0.316629
Family, Consumer and Human Sciences	Communication and Communication Studies	3	1807	0.74027	215	0.0880787	615	0.251946	1037	0.424826
Family, Consumer and Human Sciences	Communication and Communication Studies	5	1934	0.792298	263	0.107743	773	0.316673	1252	0.512905
Family, Consumer and Human Sciences	Communication and Communication Studies	10	2068	0.847194	327	0.133961	1096	0.448996	1421	0.582138
Family, Consumer and Human Sciences	Consumer and Human Sciences, various	3	341	0.831707	56	0.136585	46	0.112195	97	0.236585
Family, Consumer and Human Sciences	Consumer and Human Sciences, various	5	349	0.85122	74	0.180488	64	0.156098	120	0.292683
Family, Consumer and Human Sciences	Consumer and Human Sciences, various	10	361	0.880488	82	0.2	87	0.212195	143	0.34878
Family, Consumer and Human Sciences	Family and Human Sciences, various	3	547	0.825038	44	0.066365	91	0.137255	206	0.310709
Family, Consumer and Human Sciences	Family and Human Sciences, various	5	572	0.862745	52	0.0784314	123	0.18552	270	0.40724
Family, Consumer and Human Sciences	Family and Human Sciences, various	10	597	0.900452	62	0.0935143	192	0.289593	328	0.494721
Family, Consumer and Human Sciences	Health Promotion, Kinesiology, Exercise Science and Rehab	3	2819	0.887036	343	0.10793	222	0.0698553	775	0.243864
Family, Consumer and Human Sciences	Health Promotion, Kinesiology, Exercise Science and Rehab	5	2901	0.912838	430	0.135305	301	0.0947137	999	0.314349
Family, Consumer and Human Sciences	Health Promotion, Kinesiology, Exercise Science and Rehab	10	2962	0.932033	544	0.171177	484	0.152297	1240	0.390183
Family, Consumer and Human Sciences	Health, Physical Education, Recreation	3	737	0.8375	74	0.0840909	87	0.0988636	216	0.245455
Family, Consumer and Human Sciences	Health, Physical Education, Recreation	5	754	0.856818	84	0.0954545	110	0.125	261	0.296591
Family, Consumer and Human Sciences	Health, Physical Education, Recreation	10	781	0.8875	102	0.115909	177	0.201136	321	0.364773
Family, Consumer and Human Sciences	Human Development and Family Studies, General	3	1199	0.883567	92	0.0677966	217	0.159912	530	0.390567
Family, Consumer and Human Sciences	Human Development and Family Studies, General	5	1238	0.912307	110	0.0810612	282	0.207811	661	0.487104
Family, Consumer and Human Sciences	Human Development and Family Studies, General	10	1273	0.938099	141	0.103906	412	0.303611	775	0.571113
Family, Consumer and Human Sciences	Mass Communications/Media Studies	3	1272	0.603416	189	0.0896584	533	0.252846	794	0.37666
Family, Consumer and Human Sciences	Mass Communications/Media Studies	5	1390	0.659393	220	0.104364	689	0.32685	945	0.448292
Family, Consumer and Human Sciences	Mass Communications/Media Studies	10	1542	0.731499	251	0.11907	986	0.467742	1071	0.508065
Family, Consumer and Human Sciences	Nutrition Sciences	3	1329	0.945235	117	0.0832148	99	0.0704125	332	0.236131
Family, Consumer and Human Sciences	Nutrition Sciences	5	1349	0.959459	138	0.0981508	140	0.0995733	452	0.321479
Family, Consumer and Human Sciences	Nutrition Sciences	10	1368	0.972973	200	0.142248	248	0.176387	581	0.413229
Family, Consumer and Human Sciences	Urban and Regional Planning	3	710	0.791527	101	0.112598	241	0.268673	356	0.396878
Family, Consumer and Human Sciences	Urban and Regional Planning	5	756	0.842809	128	0.142698	296	0.329989	438	0.488294
Family, Consumer and Human Sciences	Urban and Regional Planning	10	807	0.899666	155	0.172798	429	0.478261	529	0.589744
Health Professions Sciences	Communication Disorders and Sciences	3	667	0.86511	81	0.105058	69	0.0894942	186	0.241245
Health Professions Sciences	Communication Disorders and Sciences	5	686	0.889754	103	0.133593	93	0.120623	247	0.320363
Health Professions Sciences	Communication Disorders and Sciences	10	703	0.911803	153	0.198444	144	0.18677	324	0.420233
Health Professions Sciences	Environmental Health Sciences	3	715	0.934641	165	0.215686	45	0.0588235	158	0.206536
Health Professions Sciences	Environmental Health Sciences	5	735	0.960784	179	0.233987	63	0.0823529	234	0.305882
Health Professions Sciences	Environmental Health Sciences	10	749	0.979085	253	0.330719	115	0.150327	313	0.40915
Health Professions Sciences	Health Professions, various	3	1584	0.867945	271	0.148493	163	0.0893151	427	0.233973
Health Professions Sciences	Health Professions, various	5	1639	0.898082	310	0.169863	210	0.115068	570	0.312329
Health Professions Sciences	Health Professions, various	10	1676	0.918356	366	0.200548	339	0.185753	760	0.416438
Health Professions Sciences	Medical Sciences, various	3	210	0.769231	52	0.190476	17	0.0622711	53	0.194139
Health Professions Sciences	Medical Sciences, various	5	215	0.787546	59	0.216117	28	0.102564	78	0.285714
Health Professions Sciences	Medical Sciences, various	10	221	0.809524	73	0.267399	44	0.161172	100	0.3663
Health Professions Sciences	Nursing	3	2919	0.76917	199	0.0524374	211	0.0555995	830	0.218709
Health Professions Sciences	Nursing	5	3079	0.811331	235	0.0619236	258	0.0679842	1099	0.289592
Health Professions Sciences	Nursing	10	3226	0.850066	301	0.0793149	449	0.118314	1372	0.361528
Health Professions Sciences	Pharmacy	3	1128	0.846847	104	0.0780781	51	0.0382883	326	0.244745
Health Professions Sciences	Pharmacy	5	1180	0.885886	114	0.0855856	74	0.0555556	400	0.3003
Health Professions Sciences	Pharmacy	10	1215	0.912162	164	0.123123	134	0.100601	504	0.378378
Health Professions Sciences	Public Health	3	3009	0.940312	488	0.1525	256	0.08	850	0.265625
Health Professions Sciences	Public Health	5	3052	0.95375	548	0.17125	348	0.10875	1119	0.349687
Health Professions Sciences	Public Health	10	3098	0.968125	695	0.217188	599	0.187188	1441	0.450313
Health Professions Sciences	Speech and Hearing Sciences	3	467	0.872897	67	0.125234	44	0.082243	126	0.235514
Health Professions Sciences	Speech and Hearing Sciences	5	485	0.906542	82	0.153271	63	0.117757	171	0.319626
Health Professions Sciences	Speech and Hearing Sciences	10	499	0.93271	120	0.224299	103	0.192523	239	0.446729
Health Professions Sciences	Veterinary Medical Sciences	3	2206	0.948817	218	0.0937634	134	0.0576344	652	0.28043
Health Professions Sciences	Veterinary Medical Sciences	5	2252	0.968602	242	0.104086	195	0.083871	866	0.372473
Health Professions Sciences	Veterinary Medical Sciences	10	2279	0.980215	343	0.147527	354	0.152258	1152	0.495484
Humanities	American Studies	3	250	0.672043	5	0.0134409	164	0.44086	203	0.545699
Humanities	American Studies	5	290	0.77957	5	0.0134409	213	0.572581	234	0.629032
Humanities	American Studies	10	335	0.900538	6	0.016129	296	0.795699	274	0.736559
Humanities	Ancient Studies	3	92	0.671533	2	0.0145985	67	0.489051	79	0.576642
Humanities	Ancient Studies	5	109	0.79562	4	0.0291971	84	0.613139	93	0.678832
Humanities	Ancient Studies	10	120	0.875912	4	0.0291971	109	0.79562	102	0.744526
Humanities	Area and Ethnic Studies, various	3	992	0.644993	18	0.0117035	561	0.364759	799	0.519506
Humanities	Area and Ethnic Studies, various	5	1155	0.750975	24	0.0156047	736	0.478544	944	0.613784
Humanities	Area and Ethnic Studies, various	10	1306	0.849155	36	0.023407	1086	0.706112	1100	0.715215
Humanities	Art History and Criticism	3	738	0.390063	35	0.0184989	512	0.270613	648	0.342495
Humanities	Art History and Criticism	5	906	0.478858	45	0.0237844	674	0.356237	783	0.413848
Humanities	Art History and Criticism	10	1076	0.56871	55	0.0290698	957	0.505814	913	0.482558
Humanities	Asian Languages	3	368	0.657143	5	0.00892857	225	0.401786	281	0.501786
Humanities	Asian Languages	5	421	0.751786	11	0.0196429	301	0.5375	330	0.589286
Humanities	Asian Languages	10	475	0.848214	13	0.0232143	432	0.771429	388	0.692857
Humanities	Asian Studies	3	475	0.656077	12	0.0165746	299	0.412983	378	0.522099
Humanities	Asian Studies	5	550	0.759669	16	0.0220994	383	0.529006	450	0.621547
Humanities	Asian Studies	10	623	0.860497	20	0.0276243	567	0.783149	523	0.722376
Humanities	Classics and Classical Languages	3	687	0.577311	14	0.0117647	470	0.394958	578	0.485714
Humanities	Classics and Classical Languages	5	836	0.702521	19	0.0159664	603	0.506723	685	0.57563
Humanities	Classics and Classical Languages	10	956	0.803361	26	0.0218487	831	0.698319	788	0.662185
Humanities	Comparative Literature	3	468	0.6	4	0.00512821	350	0.448718	457	0.585897
Humanities	Comparative Literature	5	562	0.720513	6	0.00769231	440	0.564103	528	0.676923
Humanities	Comparative Literature	10	647	0.829487	8	0.0102564	625	0.801282	591	0.757692
Humanities	Composition, Rhetoric and Writing	3	278	0.514815	24	0.0444444	247	0.457407	291	0.538889
Humanities	Composition, Rhetoric and Writing	5	334	0.618519	26	0.0481481	297	0.55	334	0.618519
Humanities	Composition, Rhetoric and Writing	10	392	0.725926	34	0.062963	388	0.718519	380	0.703704
Humanities	English Language and Literature	3	3541	0.553541	109	0.0170392	2613	0.408473	3306	0.516805
Humanities	English Language and Literature	5	4264	0.666562	130	0.020322	3361	0.525403	3906	0.610599
Humanities	English Language and Literature	10	4985	0.779272	160	0.0250117	4798	0.750039	4492	0.702204
Humanities	French Language and Literature	3	374	0.642612	2	0.00343643	214	0.367698	271	0.465636
Humanities	French Language and Literature	5	439	0.754296	5	0.00859107	278	0.477663	329	0.565292
Humanities	French Language and Literature	10	509	0.87457	12	0.0206186	431	0.74055	397	0.682131
Humanities	Gender Studies	3	432	0.72	7	0.0116667	240	0.4	375	0.625
Humanities	Gender Studies	5	492	0.82	13	0.0216667	320	0.533333	431	0.718333
Humanities	Gender Studies	10	541	0.901667	15	0.025	442	0.736667	487	0.811667
Humanities	Germanic Languages and Literatures	3	356	0.672968	1	0.00189036	245	0.463138	276	0.521739
Humanities	Germanic Languages and Literatures	5	416	0.786389	3	0.00567108	308	0.582231	334	0.63138
Humanities	Germanic Languages and Literatures	10	466	0.880907	4	0.00756144	411	0.776938	383	0.724008
Humanities	History	3	4122	0.748366	35	0.00635439	2301	0.417756	2741	0.49764
Humanities	History	5	4642	0.842774	42	0.00762527	3059	0.555374	3293	0.597858
Humanities	History	10	5019	0.91122	59	0.0107117	4486	0.814452	3898	0.707698
Humanities	Humanities/Humanistic Studies, General	3	519	0.669677	40	0.0516129	229	0.295484	351	0.452903
Humanities	Humanities/Humanistic Studies, General	5	591	0.762581	49	0.0632258	309	0.39871	421	0.543226
Humanities	Humanities/Humanistic Studies, General	10	648	0.836129	63	0.0812903	456	0.588387	485	0.625806
Humanities	Italian Language and Literature	3	311	0.685022	1	0.00220264	172	0.378855	220	0.484581
Humanities	Italian Language and Literature	5	363	0.799559	3	0.00660793	227	0.5	272	0.599119
Humanities	Italian Language and Literature	10	410	0.903084	7	0.0154185	347	0.764317	323	0.711454
Humanities	Languages, various	3	1488	0.574296	30	0.0115785	743	0.286762	916	0.353531
Humanities	Languages, various	5	1765	0.681204	36	0.0138942	981	0.378618	1157	0.446546
Humanities	Languages, various	10	2030	0.783481	49	0.0189116	1508	0.582015	1377	0.531455
Humanities	Linguistics	3	781	0.812695	168	0.174818	256	0.266389	482	0.501561
Humanities	Linguistics	5	847	0.881374	196	0.203954	350	0.364204	582	0.605619
Humanities	Linguistics	10	891	0.927159	242	0.251821	524	0.545265	682	0.709677
Humanities	Music specialties	3	80	0.246154	1	0.00307692	45	0.138462	56	0.172308
Humanities	Music specialties	5	94	0.289231	1	0.00307692	53	0.163077	66	0.203077
Humanities	Music specialties	10	110	0.338462	4	0.0123077	89	0.273846	81	0.249231
Humanities	Music, General	3	748	0.196171	51	0.0133753	432	0.113297	546	0.143194
Humanities	Music, General	5	935	0.245214	52	0.0136376	565	0.148177	676	0.177288
Humanities	Music, General	10	1134	0.297404	75	0.0196696	878	0.230265	829	0.217414
Humanities	Near and Middle Eastern Languages and Cultures	3	340	0.698152	4	0.00821355	221	0.453799	305	0.626283
Humanities	Near and Middle Eastern Languages and Cultures	5	377	0.774127	10	0.0205339	284	0.583162	346	0.710472
Humanities	Near and Middle Eastern Languages and Cultures	10	421	0.864476	13	0.026694	391	0.802875	374	0.767967
Humanities	Performing and Visual Arts, various	3	1216	0.210782	147	0.025481	803	0.139192	1074	0.186167
Humanities	Performing and Visual Arts, various	5	1517	0.262957	171	0.0296412	1044	0.180967	1293	0.224129
Humanities	Performing and Visual Arts, various	10	1897	0.328826	209	0.0362281	1572	0.272491	1576	0.273184
Humanities	Philosophy	3	2092	0.761558	92	0.0334911	991	0.360757	1729	0.629414
Humanities	Philosophy	5	2356	0.857663	135	0.0491445	1270	0.462323	1949	0.709501
Humanities	Philosophy	10	2511	0.914088	208	0.075719	1730	0.629778	2134	0.776847
Humanities	Religion/Religious Studies	3	905	0.653902	5	0.00361272	605	0.437139	834	0.602601
Humanities	Religion/Religious Studies	5	1063	0.768064	6	0.00433526	786	0.567919	967	0.698699
Humanities	Religion/Religious Studies	10	1197	0.864884	9	0.00650289	1082	0.781792	1077	0.778179
Humanities	Slavic Languages and Literatures	3	287	0.675294	6	0.0141176	178	0.418824	214	0.503529
Humanities	Slavic Languages and Literatures	5	335	0.788235	7	0.0164706	223	0.524706	257	0.604706
Humanities	Slavic Languages and Literatures	10	374	0.88	9	0.0211765	321	0.755294	302	0.710588
Humanities	Spanish Language and Literature	3	593	0.680046	11	0.0126147	300	0.344037	367	0.420872
Humanities	Spanish Language and Literature	5	681	0.780963	17	0.0194954	407	0.466743	462	0.529817
Humanities	Spanish Language and Literature	10	754	0.864679	21	0.0240826	623	0.71445	548	0.62844
Humanities	Theatre Literature, History and Criticism	3	210	0.1983	13	0.0122757	144	0.135977	207	0.195467
Humanities	Theatre Literature, History and Criticism	5	268	0.253069	13	0.0122757	206	0.194523	278	0.262512
Humanities	Theatre Literature, History and Criticism	10	325	0.306893	15	0.0141643	292	0.275732	316	0.298395
Humanities	Theology/Theological Studies	3	623	0.460118	3	0.00221566	617	0.455687	756	0.558346
Humanities	Theology/Theological Studies	5	726	0.536189	4	0.00295421	744	0.549483	843	0.6226
Humanities	Theology/Theological Studies	10	826	0.610044	5	0.00369276	995	0.73486	932	0.688331
Natural Resources and Conservation	Environmental Sciences	3	2108	0.933983	666	0.295082	213	0.0943731	561	0.24856
Natural Resources and Conservation	Environmental Sciences	5	2147	0.951263	735	0.325654	290	0.128489	751	0.332743
Natural Resources and Conservation	Environmental Sciences	10	2191	0.970758	860	0.381037	523	0.231724	999	0.442623
Natural Resources and Conservation	Fisheries Science	3	422	0.956916	29	0.0657596	34	0.0770975	96	0.217687
Natural Resources and Conservation	Fisheries Science	5	428	0.970522	39	0.0884354	46	0.104308	132	0.29932
Natural Resources and Conservation	Fisheries Science	10	432	0.979592	51	0.115646	82	0.185941	190	0.430839
Natural Resources and Conservation	Forest Resources/Forestry	3	789	0.939286	86	0.102381	62	0.0738095	168	0.2
Natural Resources and Conservation	Forest Resources/Forestry	5	804	0.957143	102	0.121429	77	0.0916667	230	0.27381
Natural Resources and Conservation	Forest Resources/Forestry	10	814	0.969048	147	0.175	156	0.185714	302	0.359524
Natural Resources and Conservation	Natural Resources	3	1155	0.949055	190	0.156122	123	0.101068	330	0.271159
Natural Resources and Conservation	Natural Resources	5	1171	0.962202	217	0.178307	154	0.126541	429	0.352506
Natural Resources and Conservation	Natural Resources	10	1187	0.975349	287	0.235826	277	0.227609	577	0.474117
Natural Resources and Conservation	Wildlife Science	3	435	0.977528	33	0.0741573	43	0.0966292	101	0.226966
Natural Resources and Conservation	Wildlife Science	5	437	0.982022	41	0.0921348	57	0.12809	136	0.305618
Natural Resources and Conservation	Wildlife Science	10	442	0.993258	49	0.110112	97	0.217978	195	0.438202
Physical and Mathematical Sciences	Applied Mathematics	3	563	0.915447	224	0.364228	57	0.0926829	89	0.144715
Physical and Mathematical Sciences	Applied Mathematics	5	578	0.939837	263	0.427642	80	0.130081	147	0.239024
Physical and Mathematical Sciences	Applied Mathematics	10	592	0.962602	338	0.549593	190	0.308943	222	0.360976
Physical and Mathematical Sciences	Applied Physics	3	435	0.962389	321	0.710177	46	0.10177	85	0.188053
Physical and Mathematical Sciences	Applied Physics	5	439	0.971239	344	0.761062	70	0.154867	119	0.263274
Physical and Mathematical Sciences	Applied Physics	10	443	0.980088	373	0.825221	135	0.298673	180	0.39823
Physical and Mathematical Sciences	Astronomy and Astrophysics	3	2531	0.957624	1374	0.519864	148	0.055997	300	0.113507
Physical and Mathematical Sciences	Astronomy and Astrophysics	5	2563	0.969731	1638	0.61975	212	0.0802119	421	0.159289
Physical and Mathematical Sciences	Astronomy and Astrophysics	10	2589	0.979569	1959	0.741203	481	0.18199	794	0.300416
Physical and Mathematical Sciences	Atmospheric Sciences and Meteorology	3	1099	0.966579	471	0.414248	82	0.0721196	219	0.192612
Physical and Mathematical Sciences	Atmospheric Sciences and Meteorology	5	1113	0.978892	515	0.452946	106	0.0932278	287	0.252419
Physical and Mathematical Sciences	Atmospheric Sciences and Meteorology	10	1127	0.991205	622	0.547054	220	0.193492	429	0.377309
Physical and Mathematical Sciences	Biostatistics	3	1353	0.990483	476	0.348463	95	0.0695461	264	0.193265
Physical and Mathematical Sciences	Biostatistics	5	1356	0.992679	515	0.377013	128	0.0937042	362	0.265007
Physical and Mathematical Sciences	Biostatistics	10	1361	0.99634	645	0.472182	243	0.177892	511	0.374085
Physical and Mathematical Sciences	Chemical Sciences, various	3	359	0.944737	92	0.242105	20	0.0526316	76	0.2
Physical and Mathematical Sciences	Chemical Sciences, various	5	366	0.963158	110	0.289474	31	0.0815789	116	0.305263
Physical and Mathematical Sciences	Chemical Sciences, various	10	372	0.978947	131	0.344737	79	0.207895	167	0.439474
Physical and Mathematical Sciences	Chemistry	3	5042	0.934569	978	0.181279	323	0.0598703	1121	0.207785
Physical and Mathematical Sciences	Chemistry	5	5168	0.957924	1207	0.223726	448	0.0830399	1648	0.305468
Physical and Mathematical Sciences	Chemistry	10	5253	0.973679	1656	0.306951	919	0.170343	2298	0.42595
Physical and Mathematical Sciences	Computational Sciences	3	236	0.874074	180	0.666667	22	0.0814815	52	0.192593
Physical and Mathematical Sciences	Computational Sciences	5	243	0.9	192	0.711111	27	0.1	72	0.266667
Physical and Mathematical Sciences	Computational Sciences	10	252	0.933333	210	0.777778	57	0.211111	103	0.381481
Physical and Mathematical Sciences	Computer and Information Sciences, various	3	423	0.840954	303	0.602386	66	0.131213	121	0.240557
Physical and Mathematical Sciences	Computer and Information Sciences, various	5	447	0.888668	336	0.667992	86	0.170974	151	0.300199
Physical and Mathematical Sciences	Computer and Information Sciences, various	10	466	0.926441	370	0.735586	155	0.308151	216	0.429423
Physical and Mathematical Sciences	Computer Science	3	5135	0.841665	5225	0.856417	579	0.0949025	1285	0.210621
Physical and Mathematical Sciences	Computer Science	5	5444	0.892313	5424	0.889035	794	0.130143	1953	0.320111
Physical and Mathematical Sciences	Computer Science	10	5692	0.932962	5656	0.927061	1817	0.29782	2959	0.485002
Physical and Mathematical Sciences	Geology/Earth Science, General	3	3084	0.953323	2183	0.674807	224	0.0692427	557	0.172179
Physical and Mathematical Sciences	Geology/Earth Science, General	5	3129	0.967233	2251	0.695827	313	0.0967543	762	0.235549
Physical and Mathematical Sciences	Geology/Earth Science, General	10	3175	0.981453	2355	0.727975	605	0.187017	1111	0.343431
Physical and Mathematical Sciences	Geophysics	3	315	0.972222	262	0.808642	19	0.058642	50	0.154321
Physical and Mathematical Sciences	Geophysics	5	319	0.984568	270	0.833333	36	0.111111	74	0.228395
Physical and Mathematical Sciences	Geophysics	10	320	0.987654	274	0.845679	79	0.243827	107	0.330247
Physical and Mathematical Sciences	Information Science/Studies	3	1017	0.843284	784	0.650083	179	0.148425	350	0.290216
Physical and Mathematical Sciences	Information Science/Studies	5	1071	0.88806	855	0.708955	254	0.210614	464	0.384743
Physical and Mathematical Sciences	Information Science/Studies	10	1115	0.924544	949	0.786899	415	0.344113	600	0.497512
Physical and Mathematical Sciences	Information Technology/Information Systems	3	815	0.795122	560	0.546341	102	0.0995122	183	0.178537
Physical and Mathematical Sciences	Information Technology/Information Systems	5	865	0.843902	610	0.595122	131	0.127805	256	0.249756
Physical and Mathematical Sciences	Information Technology/Information Systems	10	914	0.891707	689	0.672195	241	0.235122	384	0.374634
Physical and Mathematical Sciences	Marine Sciences	3	1096	0.962248	328	0.287972	61	0.0535558	250	0.219491
Physical and Mathematical Sciences	Marine Sciences	5	1114	0.978051	372	0.326602	88	0.0772608	329	0.28885
Physical and Mathematical Sciences	Marine Sciences	10	1122	0.985075	447	0.39245	192	0.168569	476	0.41791
Physical and Mathematical Sciences	Mathematics	3	5882	0.860948	1674	0.245023	793	0.116071	931	0.13627
Physical and Mathematical Sciences	Mathematics	5	6115	0.895053	2149	0.314549	1064	0.155738	1439	0.210626
Physical and Mathematical Sciences	Mathematics	10	6337	0.927547	2767	0.405006	1972	0.288642	2324	0.340164
Physical and Mathematical Sciences	Oceanography, Physical Sciences	3	717	0.966307	253	0.34097	47	0.0633423	155	0.208895
Physical and Mathematical Sciences	Oceanography, Physical Sciences	5	726	0.978437	287	0.386792	62	0.083558	202	0.272237
Physical and Mathematical Sciences	Oceanography, Physical Sciences	10	736	0.991914	352	0.474394	147	0.198113	306	0.412399
Physical and Mathematical Sciences	Physics, General	3	5525	0.945091	2694	0.460828	332	0.056791	643	0.10999
Physical and Mathematical Sciences	Physics, General	5	5617	0.960828	3226	0.55183	472	0.080739	946	0.16182
Physical and Mathematical Sciences	Physics, General	10	5702	0.975368	3995	0.683373	1043	0.178413	1680	0.287376
Physical and Mathematical Sciences	Statistics	3	2309	0.903011	692	0.27063	259	0.101291	342	0.13375
Physical and Mathematical Sciences	Statistics	5	2376	0.929214	866	0.338678	339	0.132577	542	0.211967
Physical and Mathematical Sciences	Statistics	10	2438	0.953461	1102	0.430974	627	0.245209	855	0.334376
Social and Behavioral Sciences	Anthropology	3	2451	0.850156	154	0.0534166	930	0.322581	1639	0.568505
Social and Behavioral Sciences	Anthropology	5	2606	0.90392	173	0.0600069	1210	0.419702	1909	0.662157
Social and Behavioral Sciences	Anthropology	10	2726	0.945543	204	0.0707596	1818	0.630593	2195	0.76136
Social and Behavioral Sciences	Applied Economics	3	272	0.900662	28	0.0927152	32	0.10596	93	0.307947
Social and Behavioral Sciences	Applied Economics	5	283	0.937086	35	0.115894	49	0.162252	127	0.42053
Social and Behavioral Sciences	Applied Economics	10	288	0.953642	41	0.135762	72	0.238411	157	0.519868
Social and Behavioral Sciences	Clinical Psychology	3	346	0.925134	31	0.0828877	63	0.168449	184	0.491979
Social and Behavioral Sciences	Clinical Psychology	5	354	0.946524	36	0.0962567	78	0.208556	226	0.604278
Social and Behavioral Sciences	Clinical Psychology	10	360	0.962567	57	0.152406	114	0.304813	274	0.73262
Social and Behavioral Sciences	Counseling Psychology	3	541	0.853312	27	0.0425868	119	0.187697	288	0.454259
Social and Behavioral Sciences	Counseling Psychology	5	561	0.884858	39	0.0615142	151	0.23817	351	0.553628
Social and Behavioral Sciences	Counseling Psychology	10	582	0.917981	53	0.0835962	224	0.353312	424	0.66877
Social and Behavioral Sciences	Criminal Justice and Criminology	3	942	0.838825	32	0.0284951	295	0.262689	561	0.499555
Social and Behavioral Sciences	Criminal Justice and Criminology	5	983	0.875334	36	0.032057	358	0.318789	648	0.577026
Social and Behavioral Sciences	Criminal Justice and Criminology	10	1029	0.916296	47	0.0418522	503	0.447907	740	0.658949
Social and Behavioral Sciences	Economics, General	3	3824	0.851481	160	0.0356268	491	0.10933	1149	0.255845
Social and Behavioral Sciences	Economics, General	5	4005	0.891784	227	0.0505455	638	0.142062	1547	0.344467
Social and Behavioral Sciences	Economics, General	10	4152	0.924516	330	0.0734803	1067	0.237586	2013	0.44823
Social and Behavioral Sciences	Educational Psychology	3	1008	0.892035	112	0.099115	227	0.200885	565	0.5
Social and Behavioral Sciences	Educational Psychology	5	1044	0.923894	133	0.117699	305	0.269912	680	0.60177
Social and Behavioral Sciences	Educational Psychology	10	1076	0.952212	158	0.139823	420	0.371681	784	0.693805
Social and Behavioral Sciences	Geography	3	1390	0.908497	340	0.222222	297	0.194118	618	0.403922
Social and Behavioral Sciences	Geography	5	1432	0.935948	378	0.247059	373	0.243791	749	0.489542
Social and Behavioral Sciences	Geography	10	1469	0.960131	458	0.299346	554	0.362092	928	0.606536
Social and Behavioral Sciences	International Affairs and Development	3	1134	0.794118	81	0.0567227	569	0.398459	765	0.535714
Social and Behavioral Sciences	International Affairs and Development	5	1234	0.864146	99	0.0693277	710	0.497199	906	0.634454
Social and Behavioral Sciences	International Affairs and Development	10	1311	0.918067	114	0.0798319	961	0.672969	1031	0.721989
Social and Behavioral Sciences	Political Science	3	3548	0.828391	119	0.0277843	1607	0.375204	2107	0.491945
Social and Behavioral Sciences	Political Science	5	3778	0.882092	149	0.0347887	2026	0.473033	2503	0.584403
Social and Behavioral Sciences	Political Science	10	3995	0.932757	182	0.0424936	2801	0.653981	2915	0.680598
Social and Behavioral Sciences	Psychology, General	3	5970	0.91832	783	0.120443	967	0.148746	2996	0.460852
Social and Behavioral Sciences	Psychology, General	5	6124	0.942009	957	0.147208	1266	0.194739	3692	0.567913
Social and Behavioral Sciences	Psychology, General	10	6274	0.965082	1210	0.186125	2027	0.311798	4466	0.686971
Social and Behavioral Sciences	Psychology, various	3	516	0.916519	50	0.0888099	94	0.166963	240	0.426288
Social and Behavioral Sciences	Psychology, various	5	524	0.930728	60	0.106572	114	0.202487	292	0.51865
Social and Behavioral Sciences	Psychology, various	10	539	0.957371	89	0.158082	188	0.333925	377	0.669627
Social and Behavioral Sciences	Public Administration	3	1015	0.824533	117	0.0950447	315	0.25589	547	0.444354
Social and Behavioral Sciences	Public Administration	5	1069	0.8684	164	0.133225	409	0.33225	675	0.548335
Social and Behavioral Sciences	Public Administration	10	1111	0.902518	189	0.153534	591	0.480097	798	0.648253
Social and Behavioral Sciences	Public Policy	3	1513	0.84857	195	0.109366	476	0.266966	821	0.46046
Social and Behavioral Sciences	Public Policy	5	1577	0.884464	262	0.146943	590	0.330903	1000	0.560852
Social and Behavioral Sciences	Public Policy	10	1656	0.928772	317	0.17779	876	0.491307	1190	0.667414
Social and Behavioral Sciences	School Psychology	3	353	0.871605	38	0.0938272	73	0.180247	207	0.511111
Social and Behavioral Sciences	School Psychology	5	372	0.918519	46	0.11358	94	0.232099	244	0.602469
Social and Behavioral Sciences	School Psychology	10	382	0.94321	56	0.138272	136	0.335802	287	0.708642
Social and Behavioral Sciences	Social Sciences, various	3	539	0.790323	86	0.1261	162	0.237537	309	0.453079
Social and Behavioral Sciences	Social Sciences, various	5	583	0.854839	111	0.162757	217	0.318182	376	0.55132
Social and Behavioral Sciences	Social Sciences, various	10	616	0.903226	129	0.18915	331	0.485337	439	0.643695
Social and Behavioral Sciences	Social Work/Social Welfare	3	1938	0.856385	65	0.0287229	335	0.148034	845	0.373398
Social and Behavioral Sciences	Social Work/Social Welfare	5	2014	0.889969	72	0.0318162	430	0.190013	1100	0.48608
Social and Behavioral Sciences	Social Work/Social Welfare	10	2078	0.91825	82	0.0362351	652	0.288113	1317	0.581971
Social and Behavioral Sciences	Sociology	3	2909	0.857606	167	0.0492335	966	0.284788	1754	0.517099
Social and Behavioral Sciences	Sociology	5	3056	0.900943	209	0.0616156	1235	0.364092	2083	0.614092
Social and Behavioral Sciences	Sociology	10	3195	0.941922	263	0.0775354	1796	0.529481	2366	0.697524
