# Supplementary material for: The Rhythms of Scholarly Publication: Suggestions to Enhance Bibliometric Comparisons Across Disciplines
Source: Front Res Metr Anal. 2022 Jan 25;7:812312. doi: 10.3389/frma.2022.812312 (PMC8821823; doi:10.3389/frma.2022.812312)
Supplement: Supplementary file 4 [file Table_4.XLSX]

## Sheet: Table 4
Supplemental Table 4. Mean and median publications per person by discipline and professorial rank over the most recent 3-, 5-, and 10-year timeframes (ending in 2019).
Broad Field	Discipline	Professorial Rank	Timeframe (years)	Mean Articles Per Person	Median Articles Per Person	Mean Conference Proceedings Per Person	Median Conference Proceedings Per Person	Mean Books Per Person	Median Books Per Person	Mean Chapters Per Person	Median Chapters Per Person
Agricultural Sciences	Agricultural Economics	Assistant Professor	3	5.20603	5	0.0904523	0	0.0150754	0	0.160804	0
Agricultural Sciences	Agricultural Economics	Assistant Professor	5	6.43216	6	0.105528	0	0.0251256	0	0.21608	0
Agricultural Sciences	Agricultural Economics	Assistant Professor	10	7.47236	7	0.145729	0	0.0603015	0	0.266332	0
Agricultural Sciences	Agricultural Economics	Associate Professor	3	7.40642	7	0.0588235	0	0.101604	0	0.385027	0
Agricultural Sciences	Agricultural Economics	Associate Professor	5	10.5668	9	0.112299	0	0.128342	0	0.652406	0
Agricultural Sciences	Agricultural Economics	Associate Professor	10	15.7968	14	0.208556	0	0.208556	0	0.946524	0
Agricultural Sciences	Agricultural Economics	Full Professor	3	8.759	6	0.110803	0	0.210526	0	0.783934	0
Agricultural Sciences	Agricultural Economics	Full Professor	5	12.8006	10	0.155125	0	0.34626	0	1.36565	0
Agricultural Sciences	Agricultural Economics	Full Professor	10	20.9058	15	0.216066	0	0.914127	0	2.37673	1
Agricultural Sciences	Agriculture, various	Assistant Professor	3	6.58511	5	0.244681	0	0.0106383	0	0.202128	0
Agricultural Sciences	Agriculture, various	Assistant Professor	5	8.52128	7	0.297872	0	0.0106383	0	0.276596	0
Agricultural Sciences	Agriculture, various	Assistant Professor	10	11.0745	9	0.595745	0	0.0212766	0	0.425532	0
Agricultural Sciences	Agriculture, various	Associate Professor	3	7.48387	4	0.241935	0	0.0483871	0	0.290323	0
Agricultural Sciences	Agriculture, various	Associate Professor	5	10.2258	6	0.33871	0	0.0483871	0	0.5	0
Agricultural Sciences	Agriculture, various	Associate Professor	10	14.5806	9	0.66129	0	0.112903	0	0.822581	0
Agricultural Sciences	Agriculture, various	Full Professor	3	7.87931	4	0.267241	0	0.215517	0	0.62931	0
Agricultural Sciences	Agriculture, various	Full Professor	5	11.8793	5.5	0.482759	0	0.275862	0	1.13793	0
Agricultural Sciences	Agriculture, various	Full Professor	10	18.6897	10	0.767241	0	0.543103	0	1.62931	0
Agricultural Sciences	Agronomy and Crop Science	Assistant Professor	3	11.4332	9	0.417112	0	0.00534759	0	0.192513	0
Agricultural Sciences	Agronomy and Crop Science	Assistant Professor	5	14.9251	12	0.486631	0	0.0160428	0	0.26738	0
Agricultural Sciences	Agronomy and Crop Science	Assistant Professor	10	19.4118	16	0.775401	0	0.0213904	0	0.42246	0
Agricultural Sciences	Agronomy and Crop Science	Associate Professor	3	18.896	14	0.265896	0	0.017341	0	0.450867	0
Agricultural Sciences	Agronomy and Crop Science	Associate Professor	5	25.2312	20	0.369942	0	0.0346821	0	0.751445	0
Agricultural Sciences	Agronomy and Crop Science	Associate Professor	10	33.7514	29	0.601156	0	0.0693642	0	1.09827	0
Agricultural Sciences	Agronomy and Crop Science	Full Professor	3	16.7382	14	0.372642	0	0.0778302	0	0.445755	0
Agricultural Sciences	Agronomy and Crop Science	Full Professor	5	23.8325	19	0.53066	0	0.141509	0	0.688679	0
Agricultural Sciences	Agronomy and Crop Science	Full Professor	10	37.0307	30	1.00708	0	0.318396	0	1.16981	0
Agricultural Sciences	Animal Sciences	Assistant Professor	3	16.1451	12	0.141975	0	0.0185185	0	0.25	0
Agricultural Sciences	Animal Sciences	Assistant Professor	5	20.4074	16	0.157407	0	0.0185185	0	0.333333	0
Agricultural Sciences	Animal Sciences	Assistant Professor	10	25.6327	21	0.237654	0	0.0308642	0	0.5	0
Agricultural Sciences	Animal Sciences	Associate Professor	3	21.3701	12	0.126623	0	0.025974	0	0.256494	0
Agricultural Sciences	Animal Sciences	Associate Professor	5	27.4188	17	0.13961	0	0.0324675	0	0.402597	0
Agricultural Sciences	Animal Sciences	Associate Professor	10	36.7468	28	0.275974	0	0.0714286	0	0.779221	0
Agricultural Sciences	Animal Sciences	Full Professor	3	22.2496	14	0.149742	0	0.10327	0	0.502582	0
Agricultural Sciences	Animal Sciences	Full Professor	5	30.6678	21	0.177281	0	0.142857	0	0.752151	0
Agricultural Sciences	Animal Sciences	Full Professor	10	46.883	36	0.413081	0	0.36833	0	1.53873	0
Agricultural Sciences	Food Science	Assistant Professor	3	11.5079	9	0.122047	0	0.0433071	0	0.26378	0
Agricultural Sciences	Food Science	Assistant Professor	5	15.3819	13	0.153543	0	0.0433071	0	0.409449	0
Agricultural Sciences	Food Science	Assistant Professor	10	20.5276	17	0.240157	0	0.0787402	0	0.653543	0
Agricultural Sciences	Food Science	Associate Professor	3	15.558	11.5	0.174107	0	0.0625	0	0.370536	0
Agricultural Sciences	Food Science	Associate Professor	5	21.5268	16	0.174107	0	0.09375	0	0.616071	0
Agricultural Sciences	Food Science	Associate Professor	10	30.5402	24	0.366071	0	0.183036	0	1.11161	0
Agricultural Sciences	Food Science	Full Professor	3	19.9597	14	0.11335	0	0.156171	0	0.664987	0
Agricultural Sciences	Food Science	Full Professor	5	29.4635	19	0.151134	0	0.234257	0	1.05793	0
Agricultural Sciences	Food Science	Full Professor	10	45.7481	32	0.335013	0	0.7733	0	2.37783	1
Agricultural Sciences	Horticulture	Assistant Professor	3	9.8254	7.5	0.579365	0	0.031746	0	0.119048	0
Agricultural Sciences	Horticulture	Assistant Professor	5	13.0635	10	0.746032	0	0.0396825	0	0.150794	0
Agricultural Sciences	Horticulture	Assistant Professor	10	16.873	14	1.07143	0	0.047619	0	0.222222	0
Agricultural Sciences	Horticulture	Associate Professor	3	11.1076	8	0.632911	0	0.0189873	0	0.310127	0
Agricultural Sciences	Horticulture	Associate Professor	5	15.2152	11	0.949367	0	0.0379747	0	0.525316	0
Agricultural Sciences	Horticulture	Associate Professor	10	22.1709	19	1.51899	0	0.120253	0	0.746835	0
Agricultural Sciences	Horticulture	Full Professor	3	12.2376	10	1.32013	0	0.125413	0	0.422442	0
Agricultural Sciences	Horticulture	Full Professor	5	17.7492	15	2.05611	0	0.165017	0	0.729373	0
Agricultural Sciences	Horticulture	Full Professor	10	28.604	24	3.15182	1	0.455446	0	1.29703	0
Agricultural Sciences	Plant Sciences	Assistant Professor	3	10.9692	9	0.259912	0	0.0176211	0	0.299559	0
Agricultural Sciences	Plant Sciences	Assistant Professor	5	14.5683	12	0.343612	0	0.0220264	0	0.422907	0
Agricultural Sciences	Plant Sciences	Assistant Professor	10	18.9648	16	0.453744	0	0.0352423	0	0.625551	0
Agricultural Sciences	Plant Sciences	Associate Professor	3	10.7185	9	0.239496	0	0.0378151	0	0.319328	0
Agricultural Sciences	Plant Sciences	Associate Professor	5	14.9538	12	0.319328	0	0.0588235	0	0.512605	0
Agricultural Sciences	Plant Sciences	Associate Professor	10	21.9832	19	0.487395	0	0.147059	0	0.869748	0
Agricultural Sciences	Plant Sciences	Full Professor	3	14.4143	11	0.346516	0	0.116761	0	0.46516	0
Agricultural Sciences	Plant Sciences	Full Professor	5	21.2637	16	0.527307	0	0.184557	0	0.757062	0
Agricultural Sciences	Plant Sciences	Full Professor	10	33.9247	26	0.990584	0	0.566855	0	1.46328	0
Agricultural Sciences	Soil Science	Assistant Professor	3	11.0535	9	0.417112	0	0	0	0.224599	0
Agricultural Sciences	Soil Science	Assistant Professor	5	14.6203	12	0.508021	0	0.00534759	0	0.342246	0
Agricultural Sciences	Soil Science	Assistant Professor	10	18.9198	15	0.839572	0	0.0160428	0	0.465241	0
Agricultural Sciences	Soil Science	Associate Professor	3	12.7526	10	0.263158	0	0.0315789	0	0.357895	0
Agricultural Sciences	Soil Science	Associate Professor	5	17.6368	13	0.347368	0	0.0473684	0	0.589474	0
Agricultural Sciences	Soil Science	Associate Professor	10	25.6053	21	0.578947	0	0.105263	0	0.931579	0
Agricultural Sciences	Soil Science	Full Professor	3	17.0603	13	0.399497	0	0.130653	0	0.477387	0
Agricultural Sciences	Soil Science	Full Professor	5	24.4121	18	0.522613	0	0.218593	0	0.919598	0
Agricultural Sciences	Soil Science	Full Professor	10	37.4196	30	1.0201	0	0.59799	0	1.48241	0
Biological and Biomedical Sciences	Anatomy	Assistant Professor	3	7.60905	6	0.316872	0	0.0534979	0	0.238683	0
Biological and Biomedical Sciences	Anatomy	Assistant Professor	5	11.2099	8	0.378601	0	0.0740741	0	0.345679	0
Biological and Biomedical Sciences	Anatomy	Assistant Professor	10	16.8519	14	0.497942	0	0.119342	0	0.580247	0
Biological and Biomedical Sciences	Anatomy	Associate Professor	3	9.15331	6	0.327526	0	0.0313589	0	0.278746	0
Biological and Biomedical Sciences	Anatomy	Associate Professor	5	13.676	10	0.362369	0	0.0487805	0	0.473868	0
Biological and Biomedical Sciences	Anatomy	Associate Professor	10	21.453	16	0.581882	0	0.097561	0	0.881533	0
Biological and Biomedical Sciences	Anatomy	Full Professor	3	15.0882	10	0.49095	0	0.128959	0	0.599548	0
Biological and Biomedical Sciences	Anatomy	Full Professor	5	23.3891	16	0.622172	0	0.20362	0	1.05656	0
Biological and Biomedical Sciences	Anatomy	Full Professor	10	39.7919	29	1.04299	0	0.527149	0	2.06109	1
Biological and Biomedical Sciences	Biochemistry	Assistant Professor	3	10.3629	8	0.330044	0	0.0164474	0	0.201754	0
Biological and Biomedical Sciences	Biochemistry	Assistant Professor	5	14.8344	12	0.370614	0	0.0252193	0	0.309211	0
Biological and Biomedical Sciences	Biochemistry	Assistant Professor	10	21.5965	17	0.447368	0	0.0438596	0	0.528509	0
Biological and Biomedical Sciences	Biochemistry	Associate Professor	3	10.4675	8	0.303751	0	0.0402562	0	0.294602	0
Biological and Biomedical Sciences	Biochemistry	Associate Professor	5	15.4822	12	0.361391	0	0.0558097	0	0.485819	0
Biological and Biomedical Sciences	Biochemistry	Associate Professor	10	24.4904	20	0.534309	0	0.149131	0	0.838975	0
Biological and Biomedical Sciences	Biochemistry	Full Professor	3	18.3068	12	0.453836	0	0.109325	0	0.468535	0
Biological and Biomedical Sciences	Biochemistry	Full Professor	5	28.3353	19	0.576941	0	0.172255	0	0.839688	0
Biological and Biomedical Sciences	Biochemistry	Full Professor	10	48.294	34	0.95085	0	0.534681	0	1.72209	1
Biological and Biomedical Sciences	Bioinformatics and Computational Biology	Assistant Professor	3	17.1582	11	1.40306	0	0.0408163	0	0.229592	0
Biological and Biomedical Sciences	Bioinformatics and Computational Biology	Assistant Professor	5	22.8061	15	1.79592	0	0.0510204	0	0.397959	0
Biological and Biomedical Sciences	Bioinformatics and Computational Biology	Assistant Professor	10	29.4133	19.5	2.56633	0	0.0765306	0	0.683673	0
Biological and Biomedical Sciences	Bioinformatics and Computational Biology	Associate Professor	3	23.3112	18	1.55102	0	0.0765306	0	0.443878	0
Biological and Biomedical Sciences	Bioinformatics and Computational Biology	Associate Professor	5	33.1684	26	2.15816	0	0.102041	0	0.765306	0
Biological and Biomedical Sciences	Bioinformatics and Computational Biology	Associate Professor	10	48.4796	39	3.64796	0	0.244898	0	1.4898	0
Biological and Biomedical Sciences	Bioinformatics and Computational Biology	Full Professor	3	32.2158	25	2.00415	0	0.165975	0	0.73029	0
Biological and Biomedical Sciences	Bioinformatics and Computational Biology	Full Professor	5	48.029	36	2.74689	0	0.228216	0	1.16598	0
Biological and Biomedical Sciences	Bioinformatics and Computational Biology	Full Professor	10	75.8257	56	4.34025	1	0.73444	0	2.51037	1
Biological and Biomedical Sciences	Biological Sciences, various	Assistant Professor	3	8.84746	6	0.59322	0	0.0338983	0	0.101695	0
Biological and Biomedical Sciences	Biological Sciences, various	Assistant Professor	5	12.5593	9	0.728814	0	0.0338983	0	0.186441	0
Biological and Biomedical Sciences	Biological Sciences, various	Assistant Professor	10	18.0678	15	0.898305	0	0.0338983	0	0.457627	0
Biological and Biomedical Sciences	Biological Sciences, various	Associate Professor	3	14.253	10	0.746988	0	0.0963855	0	0.578313	0
Biological and Biomedical Sciences	Biological Sciences, various	Associate Professor	5	21.0602	16	0.855422	0	0.120482	0	0.759036	0
Biological and Biomedical Sciences	Biological Sciences, various	Associate Professor	10	31.3494	25	1.22892	0	0.204819	0	1.18072	0
Biological and Biomedical Sciences	Biological Sciences, various	Full Professor	3	16.7	10	0.75	0	0.22	0	0.69	0
Biological and Biomedical Sciences	Biological Sciences, various	Full Professor	5	25.41	16	0.9	0	0.32	0	1.04	0
Biological and Biomedical Sciences	Biological Sciences, various	Full Professor	10	41.64	30	1.3	0	0.87	0	2.23	1
Biological and Biomedical Sciences	Biology/Biological Sciences, General	Assistant Professor	3	9.09931	7	0.159722	0	0.00972222	0	0.176389	0
Biological and Biomedical Sciences	Biology/Biological Sciences, General	Assistant Professor	5	12.984	11	0.179167	0	0.0173611	0	0.298611	0
Biological and Biomedical Sciences	Biology/Biological Sciences, General	Assistant Professor	10	18.7097	15.5	0.248611	0	0.0388889	0	0.472917	0
Biological and Biomedical Sciences	Biology/Biological Sciences, General	Associate Professor	3	8.69304	6	0.28078	0	0.0350975	0	0.218384	0
Biological and Biomedical Sciences	Biology/Biological Sciences, General	Associate Professor	5	12.8318	9	0.333705	0	0.0545961	0	0.387187	0
Biological and Biomedical Sciences	Biology/Biological Sciences, General	Associate Professor	10	20.3733	16	0.460724	0	0.116992	0	0.733148	0
Biological and Biomedical Sciences	Biology/Biological Sciences, General	Full Professor	3	13.8357	10	0.356439	0	0.12456	0	0.45848	0
Biological and Biomedical Sciences	Biology/Biological Sciences, General	Full Professor	5	21.285	15	0.467628	0	0.190711	0	0.785714	0
Biological and Biomedical Sciences	Biology/Biological Sciences, General	Full Professor	10	35.7354	25	0.737861	0	0.564391	0	1.59465	1
Biological and Biomedical Sciences	Biomedical Sciences, General	Assistant Professor	3	7.89655	6	0.163009	0	0.0188088	0	0.147335	0
Biological and Biomedical Sciences	Biomedical Sciences, General	Assistant Professor	5	11.373	9	0.191223	0	0.0219436	0	0.22884	0
Biological and Biomedical Sciences	Biomedical Sciences, General	Assistant Professor	10	16.4859	14	0.253918	0	0.0626959	0	0.426332	0
Biological and Biomedical Sciences	Biomedical Sciences, General	Associate Professor	3	11.1579	6	0.476454	0	0.0581717	0	0.33795	0
Biological and Biomedical Sciences	Biomedical Sciences, General	Associate Professor	5	16.3075	10	0.529086	0	0.0637119	0	0.473684	0
Biological and Biomedical Sciences	Biomedical Sciences, General	Associate Professor	10	25.0582	18	0.639889	0	0.124654	0	0.836565	0
Biological and Biomedical Sciences	Biomedical Sciences, General	Full Professor	3	19.864	11	0.675439	0	0.0833333	0	0.54386	0
Biological and Biomedical Sciences	Biomedical Sciences, General	Full Professor	5	30.6053	18	0.756579	0	0.140351	0	0.901316	0
Biological and Biomedical Sciences	Biomedical Sciences, General	Full Professor	10	50.8925	31	1.00219	0	0.392544	0	1.85088	1
Biological and Biomedical Sciences	Biomedical Sciences, various	Assistant Professor	3	10.4062	7	0.691964	0	0.00892857	0	0.236607	0
Biological and Biomedical Sciences	Biomedical Sciences, various	Assistant Professor	5	14.9375	11	0.808036	0	0.0178571	0	0.392857	0
Biological and Biomedical Sciences	Biomedical Sciences, various	Assistant Professor	10	21.2857	16	1.20982	0	0.0267857	0	0.59375	0
Biological and Biomedical Sciences	Biomedical Sciences, various	Associate Professor	3	14.4248	9	0.346405	0	0.130719	0	0.705882	0
Biological and Biomedical Sciences	Biomedical Sciences, various	Associate Professor	5	21.2418	14	0.457516	0	0.156863	0	1.04575	0
Biological and Biomedical Sciences	Biomedical Sciences, various	Associate Professor	10	33.2026	22	1.13725	0	0.352941	0	1.77778	0
Biological and Biomedical Sciences	Biomedical Sciences, various	Full Professor	3	21.1331	15	0.745247	0	0.106464	0	0.756654	0
Biological and Biomedical Sciences	Biomedical Sciences, various	Full Professor	5	33.1559	24	0.885932	0	0.18251	0	1.34601	0
Biological and Biomedical Sciences	Biomedical Sciences, various	Full Professor	10	55.2662	40	1.95057	0	0.730038	0	2.67681	1
Biological and Biomedical Sciences	Biophysics	Assistant Professor	3	14.2205	9	0.230769	0	0.0205128	0	0.194872	0
Biological and Biomedical Sciences	Biophysics	Assistant Professor	5	20.2615	13	0.25641	0	0.0205128	0	0.34359	0
Biological and Biomedical Sciences	Biophysics	Assistant Professor	10	29.8769	19	0.533333	0	0.0358974	0	0.620513	0
Biological and Biomedical Sciences	Biophysics	Associate Professor	3	20.1612	10	0.31405	0	0.0330579	0	0.247934	0
Biological and Biomedical Sciences	Biophysics	Associate Professor	5	28.9504	15	0.409091	0	0.0413223	0	0.396694	0
Biological and Biomedical Sciences	Biophysics	Associate Professor	10	44.1983	24	1.60744	0	0.107438	0	0.789256	0
Biological and Biomedical Sciences	Biophysics	Full Professor	3	20.7345	15	0.315891	0	0.133721	0	0.554264	0
Biological and Biomedical Sciences	Biophysics	Full Professor	5	31.7093	23	0.430233	0	0.193798	0	0.914729	0
Biological and Biomedical Sciences	Biophysics	Full Professor	10	54.6957	41	1.33915	0	0.492248	0	1.86434	1
Biological and Biomedical Sciences	Botany/Plant Biology	Assistant Professor	3	9.63636	8.5	0.363636	0	0.0113636	0	0.159091	0
Biological and Biomedical Sciences	Botany/Plant Biology	Assistant Professor	5	13.5682	12	0.386364	0	0.0227273	0	0.227273	0
Biological and Biomedical Sciences	Botany/Plant Biology	Assistant Professor	10	19.0227	16	0.454545	0	0.0227273	0	0.488636	0
Biological and Biomedical Sciences	Botany/Plant Biology	Associate Professor	3	9.74757	8	0.466019	0	0.0485437	0	0.417476	0
Biological and Biomedical Sciences	Botany/Plant Biology	Associate Professor	5	14.5631	14	0.582524	0	0.0679612	0	0.631068	0
Biological and Biomedical Sciences	Botany/Plant Biology	Associate Professor	10	22.233	21	0.718447	0	0.242718	0	1.14563	0
Biological and Biomedical Sciences	Botany/Plant Biology	Full Professor	3	17.0077	13	0.275862	0	0.130268	0	0.56705	0
Biological and Biomedical Sciences	Botany/Plant Biology	Full Professor	5	25.4751	20	0.398467	0	0.222222	0	1.02299	0
Biological and Biomedical Sciences	Botany/Plant Biology	Full Professor	10	41.4598	33	0.636015	0	0.666667	0	2.10345	1
Biological and Biomedical Sciences	Cell Biology	Assistant Professor	3	8.48911	7	0.251089	0	0.00725689	0	0.193033	0
Biological and Biomedical Sciences	Cell Biology	Assistant Professor	5	12.373	10	0.283019	0	0.011611	0	0.332366	0
Biological and Biomedical Sciences	Cell Biology	Assistant Professor	10	18.5646	15	0.377358	0	0.0217707	0	0.571843	0
Biological and Biomedical Sciences	Cell Biology	Associate Professor	3	10.9001	8	0.327707	0	0.0295359	0	0.270042	0
Biological and Biomedical Sciences	Cell Biology	Associate Professor	5	15.9831	12	0.37834	0	0.0323488	0	0.49789	0
Biological and Biomedical Sciences	Cell Biology	Associate Professor	10	24.9902	20	0.589311	0	0.0872011	0	0.901547	0
Biological and Biomedical Sciences	Cell Biology	Full Professor	3	17.253	12	0.434328	0	0.0955224	0	0.526866	0
Biological and Biomedical Sciences	Cell Biology	Full Professor	5	26.8455	19	0.533582	0	0.164925	0	0.976119	0
Biological and Biomedical Sciences	Cell Biology	Full Professor	10	45.8537	33	0.907463	0	0.480597	0	1.98731	1
Biological and Biomedical Sciences	Cognitive Science	Assistant Professor	3	11.7333	10	0.92381	0	0.0190476	0	0.428571	0
Biological and Biomedical Sciences	Cognitive Science	Assistant Professor	5	16.1619	14	1.2	0	0.0380952	0	0.685714	0
Biological and Biomedical Sciences	Cognitive Science	Assistant Professor	10	22	19	1.48571	0	0.047619	0	0.961905	0
Biological and Biomedical Sciences	Cognitive Science	Associate Professor	3	13.4182	10	1.33636	0	0.0727273	0	0.609091	0
Biological and Biomedical Sciences	Cognitive Science	Associate Professor	5	19.5727	15	1.74545	0	0.1	0	1.01818	0
Biological and Biomedical Sciences	Cognitive Science	Associate Professor	10	29.1091	23.5	2.31818	0	0.3	0	2.10909	1
Biological and Biomedical Sciences	Cognitive Science	Full Professor	3	19.6049	15	1.40122	0	0.258359	0	1.42249	1
Biological and Biomedical Sciences	Cognitive Science	Full Professor	5	29.9392	23	1.97568	0	0.465046	0	2.65046	1
Biological and Biomedical Sciences	Cognitive Science	Full Professor	10	49.7112	39	3.38298	0	1.38298	0	4.96657	3
Biological and Biomedical Sciences	Developmental Biology	Assistant Professor	3	7.93182	6.5	0.147727	0	0.00568182	0	0.3125	0
Biological and Biomedical Sciences	Developmental Biology	Assistant Professor	5	11.9886	10	0.198864	0	0.0113636	0	0.517045	0
Biological and Biomedical Sciences	Developmental Biology	Assistant Professor	10	17.9261	15	0.272727	0	0.0227273	0	0.829545	0
Biological and Biomedical Sciences	Developmental Biology	Associate Professor	3	11.0921	8.5	0.263158	0	0.0197368	0	0.296053	0
Biological and Biomedical Sciences	Developmental Biology	Associate Professor	5	16.2171	12.5	0.315789	0	0.0263158	0	0.434211	0
Biological and Biomedical Sciences	Developmental Biology	Associate Professor	10	25.2039	21	0.578947	0	0.0855263	0	0.75	0
Biological and Biomedical Sciences	Developmental Biology	Full Professor	3	17.9127	12	0.431217	0	0.0978836	0	0.603175	0
Biological and Biomedical Sciences	Developmental Biology	Full Professor	5	27.7487	19	0.539683	0	0.142857	0	1.01323	0
Biological and Biomedical Sciences	Developmental Biology	Full Professor	10	46.7778	34	0.822751	0	0.433862	0	2.13492	1
Biological and Biomedical Sciences	Ecology	Assistant Professor	3	12.1148	10	0.311005	0	0.00956938	0	0.215311	0
Biological and Biomedical Sciences	Ecology	Assistant Professor	5	17.1388	15	0.330144	0	0.0191388	0	0.311005	0
Biological and Biomedical Sciences	Ecology	Assistant Professor	10	23.6794	20	0.392344	0	0.0334928	0	0.421053	0
Biological and Biomedical Sciences	Ecology	Associate Professor	3	14.5952	12	0.438095	0	0.0761905	0	0.271429	0
Biological and Biomedical Sciences	Ecology	Associate Professor	5	20.7333	17	0.485714	0	0.0952381	0	0.547619	0
Biological and Biomedical Sciences	Ecology	Associate Professor	10	30.5238	27.5	0.561905	0	0.195238	0	0.995238	0
Biological and Biomedical Sciences	Ecology	Full Professor	3	19.8954	16	0.455046	0	0.146789	0	0.583486	0
Biological and Biomedical Sciences	Ecology	Full Professor	5	29.6404	25	0.554128	0	0.251376	0	0.979817	0
Biological and Biomedical Sciences	Ecology	Full Professor	10	47.6679	39	0.816514	0	0.838532	0	2.22385	1
Biological and Biomedical Sciences	Entomology	Assistant Professor	3	11.4939	10	0.481707	0	0.0182927	0	0.25	0
Biological and Biomedical Sciences	Entomology	Assistant Professor	5	15.7866	14	0.542683	0	0.0304878	0	0.335366	0
Biological and Biomedical Sciences	Entomology	Assistant Professor	10	21.4146	18	0.560976	0	0.0487805	0	0.5	0
Biological and Biomedical Sciences	Entomology	Associate Professor	3	14	12	0.568	0	0.024	0	0.36	0
Biological and Biomedical Sciences	Entomology	Associate Professor	5	19.44	18	0.624	1	0.056	0	0.488	0
Biological and Biomedical Sciences	Entomology	Associate Professor	10	29.216	26	0.776	1	0.192	0	0.808	0
Biological and Biomedical Sciences	Entomology	Full Professor	3	16.2098	14	0.62439	1	0.117073	0	0.697561	0
Biological and Biomedical Sciences	Entomology	Full Professor	5	24.0244	20	0.717073	1	0.192683	0	1.04634	0
Biological and Biomedical Sciences	Entomology	Full Professor	10	38.9561	35	0.931707	1	0.568293	0	1.7561	1
Biological and Biomedical Sciences	Epidemiology	Assistant Professor	3	22.3826	17.5	0.528261	0	0.0195652	0	0.178261	0
Biological and Biomedical Sciences	Epidemiology	Assistant Professor	5	30.0457	24	0.556522	0	0.0195652	0	0.267391	0
Biological and Biomedical Sciences	Epidemiology	Assistant Professor	10	37.9587	30	0.682609	0	0.0347826	0	0.402174	0
Biological and Biomedical Sciences	Epidemiology	Associate Professor	3	34.8438	26	0.74375	0	0.0625	0	0.495833	0
Biological and Biomedical Sciences	Epidemiology	Associate Professor	5	49.5167	37	0.829167	0	0.0875	0	0.691667	0
Biological and Biomedical Sciences	Epidemiology	Associate Professor	10	70.1958	57	1.12917	0	0.208333	0	1.13542	0
Biological and Biomedical Sciences	Epidemiology	Full Professor	3	60.4067	44	1.15288	0	0.14446	0	0.854137	0
Biological and Biomedical Sciences	Epidemiology	Full Professor	5	89.7433	67	1.30575	0	0.231417	0	1.3913	0
Biological and Biomedical Sciences	Epidemiology	Full Professor	10	139.729	105	2.2202	0	0.677419	0	2.68022	1
Biological and Biomedical Sciences	Evolutionary Biology	Assistant Professor	3	11.8037	10	0.251534	0	0.0429448	0	0.263804	0
Biological and Biomedical Sciences	Evolutionary Biology	Assistant Professor	5	16.5153	14	0.276074	0	0.0552147	0	0.368098	0
Biological and Biomedical Sciences	Evolutionary Biology	Assistant Professor	10	23.1227	19	0.349693	0	0.0552147	0	0.539877	0
Biological and Biomedical Sciences	Evolutionary Biology	Associate Professor	3	14.8678	12	0.287356	0	0.0747126	0	0.333333	0
Biological and Biomedical Sciences	Evolutionary Biology	Associate Professor	5	21.069	17	0.327586	0	0.109195	0	0.672414	0
Biological and Biomedical Sciences	Evolutionary Biology	Associate Professor	10	31.2356	28	0.396552	0	0.235632	0	1.22414	0
Biological and Biomedical Sciences	Evolutionary Biology	Full Professor	3	20.0127	16	0.401691	0	0.213531	0	0.792812	0
Biological and Biomedical Sciences	Evolutionary Biology	Full Professor	5	30.1543	25	0.479915	0	0.342495	0	1.32558	0
Biological and Biomedical Sciences	Evolutionary Biology	Full Professor	10	48.8837	41	0.682875	0	1.08245	0	2.89852	2
Biological and Biomedical Sciences	Genetics	Assistant Professor	3	13.05	10	0.475	0	0.0208333	0	0.1875	0
Biological and Biomedical Sciences	Genetics	Assistant Professor	5	18.0708	13	0.55	0	0.025	0	0.304167	0
Biological and Biomedical Sciences	Genetics	Assistant Professor	10	24.8958	19.5	0.825	0	0.0416667	0	0.5375	0
Biological and Biomedical Sciences	Genetics	Associate Professor	3	16.9494	11	0.658228	0	0.0337553	0	0.421941	0
Biological and Biomedical Sciences	Genetics	Associate Professor	5	23.8987	17	0.708861	0	0.0421941	0	0.620253	0
Biological and Biomedical Sciences	Genetics	Associate Professor	10	35.5781	27	0.987342	0	0.0590717	0	1.04219	0
Biological and Biomedical Sciences	Genetics	Full Professor	3	25.5546	16	0.529897	0	0.105155	0	0.670103	0
Biological and Biomedical Sciences	Genetics	Full Professor	5	38.8784	26	0.682474	0	0.179381	0	1.20825	0
Biological and Biomedical Sciences	Genetics	Full Professor	10	63.8784	44	1.2	0	0.639175	0	2.36907	1
Biological and Biomedical Sciences	Human and Medical Genetics	Assistant Professor	3	13.1182	10	0.381818	0	0.0454545	0	0.290909	0
Biological and Biomedical Sciences	Human and Medical Genetics	Assistant Professor	5	18.0455	14	0.427273	0	0.0545455	0	0.509091	0
Biological and Biomedical Sciences	Human and Medical Genetics	Assistant Professor	10	25.3909	19	0.636364	0	0.0636364	0	0.772727	0
Biological and Biomedical Sciences	Human and Medical Genetics	Associate Professor	3	19.9259	17	0.511111	0	0.0296296	0	0.325926	0
Biological and Biomedical Sciences	Human and Medical Genetics	Associate Professor	5	28.363	24	0.592593	0	0.0444444	0	0.614815	0
Biological and Biomedical Sciences	Human and Medical Genetics	Associate Professor	10	42.2593	36	0.859259	0	0.177778	0	1.00741	0
Biological and Biomedical Sciences	Human and Medical Genetics	Full Professor	3	35.4648	22.5	0.517606	0	0.137324	0	0.823944	0
Biological and Biomedical Sciences	Human and Medical Genetics	Full Professor	5	53.5176	34	0.640845	0	0.239437	0	1.40141	0
Biological and Biomedical Sciences	Human and Medical Genetics	Full Professor	10	86.8592	59.5	1.15141	0	0.711268	0	2.62324	1
Biological and Biomedical Sciences	Immunology	Assistant Professor	3	10.319	7	0.325431	0	0.0107759	0	0.1875	0
Biological and Biomedical Sciences	Immunology	Assistant Professor	5	14.4806	11	0.336207	0	0.012931	0	0.331897	0
Biological and Biomedical Sciences	Immunology	Assistant Professor	10	20.9246	17	0.381466	0	0.0193966	0	0.532328	0
Biological and Biomedical Sciences	Immunology	Associate Professor	3	14.8478	9	0.411067	0	0.0454545	0	0.359684	0
Biological and Biomedical Sciences	Immunology	Associate Professor	5	21.7213	15	0.438735	0	0.0632411	0	0.626482	0
Biological and Biomedical Sciences	Immunology	Associate Professor	10	33.7194	24	0.632411	0	0.118577	0	1.1996	0
Biological and Biomedical Sciences	Immunology	Full Professor	3	22.2081	15	0.534517	0	0.115385	0	0.754438	0
Biological and Biomedical Sciences	Immunology	Full Professor	5	34.1272	24	0.571006	0	0.175542	0	1.30375	0
Biological and Biomedical Sciences	Immunology	Full Professor	10	57.2357	42	0.956607	0	0.503945	0	2.5927	1
Biological and Biomedical Sciences	Microbiology	Assistant Professor	3	9.0063	7	0.162205	0	0.00629921	0	0.162205	0
Biological and Biomedical Sciences	Microbiology	Assistant Professor	5	13.1402	11	0.174803	0	0.0125984	0	0.305512	0
Biological and Biomedical Sciences	Microbiology	Assistant Professor	10	19.6157	17	0.218898	0	0.0220472	0	0.514961	0
Biological and Biomedical Sciences	Microbiology	Associate Professor	3	11.9556	10	0.262097	0	0.0362903	0	0.28629	0
Biological and Biomedical Sciences	Microbiology	Associate Professor	5	17.7917	14	0.295699	0	0.0524194	0	0.513441	0
Biological and Biomedical Sciences	Microbiology	Associate Professor	10	28.0511	23	0.467742	0	0.110215	0	0.967742	0
Biological and Biomedical Sciences	Microbiology	Full Professor	3	18.6361	13	0.372109	0	0.0972789	0	0.578231	0
Biological and Biomedical Sciences	Microbiology	Full Professor	5	28.7762	21	0.42449	0	0.160544	0	1.05102	0
Biological and Biomedical Sciences	Microbiology	Full Professor	10	48.6116	36	0.701361	0	0.484354	0	2.15442	1
Biological and Biomedical Sciences	Molecular Biology	Assistant Professor	3	9.52174	8	0.273043	0	0.013913	0	0.191304	0
Biological and Biomedical Sciences	Molecular Biology	Assistant Professor	5	13.7739	11	0.288696	0	0.0173913	0	0.328696	0
Biological and Biomedical Sciences	Molecular Biology	Assistant Professor	10	20.6713	17	0.353043	0	0.0382609	0	0.558261	0
Biological and Biomedical Sciences	Molecular Biology	Associate Professor	3	10.3645	8	0.386293	0	0.0373832	0	0.303738	0
Biological and Biomedical Sciences	Molecular Biology	Associate Professor	5	15.3069	12	0.437695	0	0.0451713	0	0.529595	0
Biological and Biomedical Sciences	Molecular Biology	Associate Professor	10	24.0436	20	0.580997	0	0.0996885	0	0.990654	0
Biological and Biomedical Sciences	Molecular Biology	Full Professor	3	16.6691	12	0.380882	0	0.105882	0	0.514706	0
Biological and Biomedical Sciences	Molecular Biology	Full Professor	5	25.8081	18	0.458824	0	0.172059	0	0.943382	0
Biological and Biomedical Sciences	Molecular Biology	Full Professor	10	44.2993	33	0.769853	0	0.523529	0	1.99044	1
Biological and Biomedical Sciences	Molecular Genetics	Assistant Professor	3	11.2383	8	0.316062	0	0.0103627	0	0.274611	0
Biological and Biomedical Sciences	Molecular Genetics	Assistant Professor	5	15.7461	12	0.331606	0	0.0259067	0	0.481865	0
Biological and Biomedical Sciences	Molecular Genetics	Assistant Professor	10	22.6166	17	0.393782	0	0.0310881	0	0.725389	0
Biological and Biomedical Sciences	Molecular Genetics	Associate Professor	3	13.4794	11	0.221649	0	0.0154639	0	0.350515	0
Biological and Biomedical Sciences	Molecular Genetics	Associate Professor	5	19.8866	15	0.252577	0	0.0257732	0	0.587629	0
Biological and Biomedical Sciences	Molecular Genetics	Associate Professor	10	30.6649	24	0.319588	0	0.0463918	0	0.943299	0
Biological and Biomedical Sciences	Molecular Genetics	Full Professor	3	19.946	13	0.43662	0	0.115023	0	0.502347	0
Biological and Biomedical Sciences	Molecular Genetics	Full Professor	5	30.439	21	0.511737	0	0.190141	0	0.931925	0
Biological and Biomedical Sciences	Molecular Genetics	Full Professor	10	50.6244	36	0.826291	0	0.495305	0	1.87324	1
Biological and Biomedical Sciences	Molecular Pharmacology	Assistant Professor	3	11.2963	8	0.283951	0	0.0493827	0	0.283951	0
Biological and Biomedical Sciences	Molecular Pharmacology	Assistant Professor	5	16.3951	13	0.320988	0	0.0987654	0	0.493827	0
Biological and Biomedical Sciences	Molecular Pharmacology	Assistant Professor	10	23.5802	19	0.358025	0	0.135802	0	0.753086	0
Biological and Biomedical Sciences	Molecular Pharmacology	Associate Professor	3	15.2824	12	0.305882	0	0.0941176	0	0.411765	0
Biological and Biomedical Sciences	Molecular Pharmacology	Associate Professor	5	22.2235	17	0.364706	0	0.105882	0	0.623529	0
Biological and Biomedical Sciences	Molecular Pharmacology	Associate Professor	10	33.6706	26	0.517647	0	0.188235	0	1.04706	0
Biological and Biomedical Sciences	Molecular Pharmacology	Full Professor	3	24.8186	16	0.818605	0	0.148837	0	0.753488	0
Biological and Biomedical Sciences	Molecular Pharmacology	Full Professor	5	38.0605	26	0.906977	0	0.223256	0	1.27442	0
Biological and Biomedical Sciences	Molecular Pharmacology	Full Professor	10	63.1163	45	1.18605	0	0.502326	0	2.74884	1
Biological and Biomedical Sciences	Neurobiology/Neuroscience	Assistant Professor	3	10.2419	7	0.15952	0	0.0205832	0	0.219554	0
Biological and Biomedical Sciences	Neurobiology/Neuroscience	Assistant Professor	5	14.4237	10	0.188679	0	0.0291595	0	0.377358	0
Biological and Biomedical Sciences	Neurobiology/Neuroscience	Assistant Professor	10	20.7702	15	0.291595	0	0.051458	0	0.699828	0
Biological and Biomedical Sciences	Neurobiology/Neuroscience	Associate Professor	3	12.5878	9	0.366412	0	0.0610687	0	0.353053	0
Biological and Biomedical Sciences	Neurobiology/Neuroscience	Associate Professor	5	18.1565	13	0.480916	0	0.0896947	0	0.681298	0
Biological and Biomedical Sciences	Neurobiology/Neuroscience	Associate Professor	10	27.3321	21	0.652672	0	0.160305	0	1.22519	0
Biological and Biomedical Sciences	Neurobiology/Neuroscience	Full Professor	3	19.6296	13	0.431818	0	0.155724	0	0.888889	0
Biological and Biomedical Sciences	Neurobiology/Neuroscience	Full Professor	5	29.9596	20	0.638889	0	0.240741	0	1.617	1
Biological and Biomedical Sciences	Neurobiology/Neuroscience	Full Professor	10	50.3123	35	1.09091	0	0.694444	0	3.16246	1
Biological and Biomedical Sciences	Oncology and Cancer Biology	Assistant Professor	3	10.8777	8	0.870504	0	0	0	0.18705	0
Biological and Biomedical Sciences	Oncology and Cancer Biology	Assistant Professor	5	16.1727	13	0.884892	0	0	0	0.280576	0
Biological and Biomedical Sciences	Oncology and Cancer Biology	Assistant Professor	10	25.5971	20	1.03597	0	0.00719424	0	0.489209	0
Biological and Biomedical Sciences	Oncology and Cancer Biology	Associate Professor	3	15.4211	11	0.676692	0	0.0225564	0	0.353383	0
Biological and Biomedical Sciences	Oncology and Cancer Biology	Associate Professor	5	23.3759	17	0.699248	0	0.0300752	0	0.518797	0
Biological and Biomedical Sciences	Oncology and Cancer Biology	Associate Professor	10	36.1128	29	0.849624	0	0.0676692	0	0.932331	0
Biological and Biomedical Sciences	Oncology and Cancer Biology	Full Professor	3	24.8521	17	1.23346	0	0.101167	0	0.564202	0
Biological and Biomedical Sciences	Oncology and Cancer Biology	Full Professor	5	38.3619	27	1.36187	0	0.136187	0	0.996109	0
Biological and Biomedical Sciences	Oncology and Cancer Biology	Full Professor	10	63.8249	48	1.68872	0	0.361868	0	1.92607	1
Biological and Biomedical Sciences	Oral Biology and Craniofacial Science	Assistant Professor	3	12.0811	8	0.297297	0	0.027027	0	0.243243	0
Biological and Biomedical Sciences	Oral Biology and Craniofacial Science	Assistant Professor	5	16.2432	10	0.378378	0	0.027027	0	0.243243	0
Biological and Biomedical Sciences	Oral Biology and Craniofacial Science	Assistant Professor	10	23.2973	19	0.459459	0	0.027027	0	0.594595	0
Biological and Biomedical Sciences	Oral Biology and Craniofacial Science	Associate Professor	3	11.1897	8	0.172414	0	0.0517241	0	0.241379	0
Biological and Biomedical Sciences	Oral Biology and Craniofacial Science	Associate Professor	5	17.3966	13	0.241379	0	0.0862069	0	0.431034	0
Biological and Biomedical Sciences	Oral Biology and Craniofacial Science	Associate Professor	10	27.9828	20.5	0.344828	0	0.137931	0	0.913793	0.5
Biological and Biomedical Sciences	Oral Biology and Craniofacial Science	Full Professor	3	16.0515	11	0.113402	0	0.0721649	0	0.670103	0
Biological and Biomedical Sciences	Oral Biology and Craniofacial Science	Full Professor	5	24.4227	18	0.206186	0	0.134021	0	1.04124	0
Biological and Biomedical Sciences	Oral Biology and Craniofacial Science	Full Professor	10	40.4742	29	0.371134	0	0.371134	0	2.12371	1
Biological and Biomedical Sciences	Pathology	Assistant Professor	3	9.44324	6	0.305405	0	0.0288288	0	0.288288	0
Biological and Biomedical Sciences	Pathology	Assistant Professor	5	13.2396	9	0.327928	0	0.0315315	0	0.44955	0
Biological and Biomedical Sciences	Pathology	Assistant Professor	10	18.4586	14	0.404505	0	0.0342342	0	0.667568	0
Biological and Biomedical Sciences	Pathology	Associate Professor	3	15.2995	11	0.432367	0	0.0495169	0	0.485507	0
Biological and Biomedical Sciences	Pathology	Associate Professor	5	22.8188	17	0.478261	0	0.0652174	0	0.855072	0
Biological and Biomedical Sciences	Pathology	Associate Professor	10	34.2053	27	0.727053	0	0.121981	0	1.34903	0
Biological and Biomedical Sciences	Pathology	Full Professor	3	24.4708	16	0.65433	0	0.150999	0	0.971873	0
Biological and Biomedical Sciences	Pathology	Full Professor	5	37.5433	26	0.719467	0	0.242783	0	1.6906	1
Biological and Biomedical Sciences	Pathology	Full Professor	10	62.7957	45	1.14434	0	0.640266	0	3.094	1
Biological and Biomedical Sciences	Pharmaceutical Sciences	Assistant Professor	3	11.0742	9	0.225519	0	0.0207715	0	0.234421	0
Biological and Biomedical Sciences	Pharmaceutical Sciences	Assistant Professor	5	15.6053	13	0.255193	0	0.0326409	0	0.329377	0
Biological and Biomedical Sciences	Pharmaceutical Sciences	Assistant Professor	10	22.3056	19	0.362018	0	0.0593472	0	0.545994	0
Biological and Biomedical Sciences	Pharmaceutical Sciences	Associate Professor	3	14.2277	11	0.28125	0	0.0446429	0	0.357143	0
Biological and Biomedical Sciences	Pharmaceutical Sciences	Associate Professor	5	20.8281	16	0.328125	0	0.0691964	0	0.591518	0
Biological and Biomedical Sciences	Pharmaceutical Sciences	Associate Professor	10	31.8192	25	0.444196	0	0.127232	0	0.995536	0
Biological and Biomedical Sciences	Pharmaceutical Sciences	Full Professor	3	20.6519	14	0.417974	0	0.121255	0	0.633381	0
Biological and Biomedical Sciences	Pharmaceutical Sciences	Full Professor	5	31.5792	23	0.49786	0	0.184023	0	1.10271	0
Biological and Biomedical Sciences	Pharmaceutical Sciences	Full Professor	10	53.5478	39	0.776034	0	0.476462	0	2.24822	1
Biological and Biomedical Sciences	Pharmacology	Assistant Professor	3	11.8815	9	0.37069	0	0.0237069	0	0.196121	0
Biological and Biomedical Sciences	Pharmacology	Assistant Professor	5	17.1228	13	0.400862	0	0.0301724	0	0.346983	0
Biological and Biomedical Sciences	Pharmacology	Assistant Professor	10	25.2651	20	0.556034	0	0.0431034	0	0.614224	0
Biological and Biomedical Sciences	Pharmacology	Associate Professor	3	14.573	10	0.495495	0	0.0558559	0	0.345946	0
Biological and Biomedical Sciences	Pharmacology	Associate Professor	5	21.9045	15	0.536937	0	0.0756757	0	0.627027	0
Biological and Biomedical Sciences	Pharmacology	Associate Professor	10	34.1261	24	0.715315	0	0.127928	0	1.0955	0
Biological and Biomedical Sciences	Pharmacology	Full Professor	3	22.4442	14	0.626775	0	0.0993915	0	0.636917	0
Biological and Biomedical Sciences	Pharmacology	Full Professor	5	34.6481	22.5	0.701826	0	0.162272	0	1.1572	0
Biological and Biomedical Sciences	Pharmacology	Full Professor	10	58.8702	41.5	1.18864	0	0.478702	0	2.27282	1
Biological and Biomedical Sciences	Physiology, General	Assistant Professor	3	10.084	8	0.136719	0	0.00585938	0	0.136719	0
Biological and Biomedical Sciences	Physiology, General	Assistant Professor	5	14.5605	11	0.166016	0	0.0117188	0	0.253906	0
Biological and Biomedical Sciences	Physiology, General	Assistant Professor	10	21.6875	17	0.386719	0	0.0488281	0	0.453125	0
Biological and Biomedical Sciences	Physiology, General	Associate Professor	3	12.7078	9	0.267112	0	0.0450751	0	0.290484	0
Biological and Biomedical Sciences	Physiology, General	Associate Professor	5	18.6444	14	0.328881	0	0.0584307	0	0.470785	0
Biological and Biomedical Sciences	Physiology, General	Associate Professor	10	28.8214	23	0.555927	0	0.103506	0	0.916528	0
Biological and Biomedical Sciences	Physiology, General	Full Professor	3	16.9798	12	0.30343	0	0.103782	0	0.551451	0
Biological and Biomedical Sciences	Physiology, General	Full Professor	5	26.2155	19	0.421284	0	0.172383	0	0.955145	0
Biological and Biomedical Sciences	Physiology, General	Full Professor	10	45.0792	33	0.987687	0	0.451187	0	1.89182	1
Biological and Biomedical Sciences	Plant Pathology	Assistant Professor	3	10.408	9	0.201149	0	0.0114943	0	0.178161	0
Biological and Biomedical Sciences	Plant Pathology	Assistant Professor	5	14.069	11	0.287356	0	0.0172414	0	0.229885	0
Biological and Biomedical Sciences	Plant Pathology	Assistant Professor	10	19.7586	17	0.350575	0	0.045977	0	0.442529	0
Biological and Biomedical Sciences	Plant Pathology	Associate Professor	3	13.1898	10	0.284672	0	0.0291971	0	0.423358	0
Biological and Biomedical Sciences	Plant Pathology	Associate Professor	5	18.1752	14	0.49635	0	0.0437956	0	0.554745	0
Biological and Biomedical Sciences	Plant Pathology	Associate Professor	10	26.5693	23	0.773723	0	0.145985	0	0.854015	0
Biological and Biomedical Sciences	Plant Pathology	Full Professor	3	15.7451	13	0.271709	0	0.0868347	0	0.557423	0
Biological and Biomedical Sciences	Plant Pathology	Full Professor	5	22.8655	19	0.420168	0	0.145658	0	0.893557	0
Biological and Biomedical Sciences	Plant Pathology	Full Professor	10	36.3557	32	0.80112	0	0.434174	0	1.52941	1
Biological and Biomedical Sciences	Structural Biology	Assistant Professor	3	9.36	8	0.68	0	0	0	0.2	0
Biological and Biomedical Sciences	Structural Biology	Assistant Professor	5	13.52	10	0.84	0	0	0	0.44	0
Biological and Biomedical Sciences	Structural Biology	Assistant Professor	10	18.28	15	0.96	0	0	0	0.52	0
Biological and Biomedical Sciences	Structural Biology	Associate Professor	3	13.575	11.5	0.275	0	0.1	0	0.275	0
Biological and Biomedical Sciences	Structural Biology	Associate Professor	5	20.475	17.5	0.3	0	0.125	0	0.6	0
Biological and Biomedical Sciences	Structural Biology	Associate Professor	10	34.775	27	0.525	0	0.25	0	1.225	0
Biological and Biomedical Sciences	Structural Biology	Full Professor	3	27.0735	18.5	0.852941	0	0.0735294	0	0.220588	0
Biological and Biomedical Sciences	Structural Biology	Full Professor	5	40.6912	29.5	1	0	0.0882353	0	0.558824	0
Biological and Biomedical Sciences	Structural Biology	Full Professor	10	67.8235	50	1.38235	0	0.5	0	1.51471	0
Biological and Biomedical Sciences	Toxicology	Assistant Professor	3	11.8041	8	0.474227	0	0.0206186	0	0.206186	0
Biological and Biomedical Sciences	Toxicology	Assistant Professor	5	16.8969	11	0.505155	0	0.0206186	0	0.319588	0
Biological and Biomedical Sciences	Toxicology	Assistant Professor	10	25.2062	21	0.752577	0	0.0206186	0	0.505155	0
Biological and Biomedical Sciences	Toxicology	Associate Professor	3	10.7956	8	0.291971	0	0.0364964	0	0.218978	0
Biological and Biomedical Sciences	Toxicology	Associate Professor	5	16.4088	13	0.313869	0	0.080292	0	0.510949	0
Biological and Biomedical Sciences	Toxicology	Associate Professor	10	26.219	22	0.525547	0	0.153285	0	0.846715	0
Biological and Biomedical Sciences	Toxicology	Full Professor	3	19.6976	14	0.407258	0	0.108871	0	0.608871	0
Biological and Biomedical Sciences	Toxicology	Full Professor	5	30.4516	21	0.447581	0	0.16129	0	1.04839	0
Biological and Biomedical Sciences	Toxicology	Full Professor	10	51.5121	37	1.16935	0	0.467742	0	2.08065	1
Biological and Biomedical Sciences	Zoology	Assistant Professor	3	9.33898	7	0.0338983	0	0.0169492	0	0.20339	0
Biological and Biomedical Sciences	Zoology	Assistant Professor	5	12.7119	9	0.0847458	0	0.0169492	0	0.271186	0
Biological and Biomedical Sciences	Zoology	Assistant Professor	10	18.0847	13	0.118644	0	0.0169492	0	0.457627	0
Biological and Biomedical Sciences	Zoology	Associate Professor	3	11.8958	10	0.479167	0	0	0	0.166667	0
Biological and Biomedical Sciences	Zoology	Associate Professor	5	16.8333	14.5	0.479167	0	0	0	0.354167	0
Biological and Biomedical Sciences	Zoology	Associate Professor	10	26.1875	22	0.604167	0	0.0208333	0	0.604167	0
Biological and Biomedical Sciences	Zoology	Full Professor	3	16.5921	14	0.223684	0	0.223684	0	0.434211	0
Biological and Biomedical Sciences	Zoology	Full Professor	5	24.8816	20.5	0.394737	0	0.328947	0	0.736842	0
Biological and Biomedical Sciences	Zoology	Full Professor	10	41.7105	38.5	0.723684	0	0.723684	0	1.60526	1
Business	Accounting	Assistant Professor	3	2.5617	2	0.0283688	0	0.0070922	0	0.0397163	0
Business	Accounting	Assistant Professor	5	3.35461	2	0.0439716	0	0.0070922	0	0.0496454	0
Business	Accounting	Assistant Professor	10	4.19716	3	0.0652482	0	0.00992908	0	0.0723404	0
Business	Accounting	Associate Professor	3	3.15077	2	0.0369231	0	0.164615	0	0.0723077	0
Business	Accounting	Associate Professor	5	4.93385	3	0.0630769	0	0.235385	0	0.132308	0
Business	Accounting	Associate Professor	10	8.53231	7	0.0861538	0	0.489231	0	0.249231	0
Business	Accounting	Full Professor	3	3.79245	2	0.0711176	0	0.409289	0	0.204644	0
Business	Accounting	Full Professor	5	6.03338	4	0.127721	0	0.624093	0	0.323657	0
Business	Accounting	Full Professor	10	11.627	9	0.238026	0	1.5762	0	0.69521	0
Business	Business Administration	Assistant Professor	3	3.30441	2	0.724518	0	0.0275482	0	0.137741	0
Business	Business Administration	Assistant Professor	5	4.37466	3	1.06887	0	0.0289256	0	0.210744	0
Business	Business Administration	Assistant Professor	10	5.42149	4	1.39256	0	0.0523416	0	0.319559	0
Business	Business Administration	Associate Professor	3	3.97661	3	0.840643	0	0.0511696	0	0.26462	0
Business	Business Administration	Associate Professor	5	6.13012	5	1.24708	0	0.0877193	0	0.44883	0
Business	Business Administration	Associate Professor	10	10.1213	8	1.7924	0	0.225146	0	0.836257	0
Business	Business Administration	Full Professor	3	5.69192	4	0.828514	0	0.283151	0	0.911266	0
Business	Business Administration	Full Professor	5	8.95513	6	1.32702	0	0.475573	0	1.54038	0
Business	Business Administration	Full Professor	10	16.0608	12	1.89332	0	1.33101	0	3.35593	1
Business	Business, various	Assistant Professor	3	4.8863	3	0.811953	0	0.03207	0	0.217201	0
Business	Business, various	Assistant Professor	5	6.09038	4	1.11516	0	0.0422741	0	0.325073	0
Business	Business, various	Assistant Professor	10	7.26676	5	1.36006	0	0.0539359	0	0.440233	0
Business	Business, various	Associate Professor	3	5.60428	4	0.741979	0	0.121658	0	0.454545	0
Business	Business, various	Associate Professor	5	8.13636	6	1.13369	0	0.196524	0	0.731283	0
Business	Business, various	Associate Professor	10	12.6564	10	1.60829	0	0.398396	0	1.20321	0
Business	Business, various	Full Professor	3	6.68211	4	0.836207	0	0.467672	0	1.01401	0
Business	Business, various	Full Professor	5	10.1466	6	1.41056	0	0.701509	0	1.69612	0
Business	Business, various	Full Professor	10	17.1724	11	1.85022	0	1.78017	0	3.26724	1
Business	Finance	Assistant Professor	3	3.12744	2	0.041979	0	0.0164918	0	0.0464768	0
Business	Finance	Assistant Professor	5	4.24138	3	0.0524738	0	0.023988	0	0.065967	0
Business	Finance	Assistant Professor	10	5.53673	4	0.0629685	0	0.0329835	0	0.089955	0
Business	Finance	Associate Professor	3	3.61608	3	0.0515933	0	0.0500759	0	0.091047	0
Business	Finance	Associate Professor	5	5.63429	5	0.0743551	0	0.0834598	0	0.177542	0
Business	Finance	Associate Professor	10	10.2564	9	0.104704	0	0.180577	0	0.355083	0
Business	Finance	Full Professor	3	4.94954	3	0.0745413	0	0.188073	0	0.393349	0
Business	Finance	Full Professor	5	7.81881	5	0.115826	0	0.309633	0	0.684633	0
Business	Finance	Full Professor	10	14.8303	10.5	0.163991	0	0.998853	0	1.56537	0
Business	Management	Assistant Professor	3	3.85845	3	1.86049	1	0.0244399	0	0.295316	0
Business	Management	Assistant Professor	5	5.12016	4	2.66904	1	0.0325866	0	0.421589	0
Business	Management	Assistant Professor	10	6.4053	5	3.26477	2	0.0580448	0	0.596741	0
Business	Management	Associate Professor	3	4.87106	3	1.71358	0	0.116142	0	0.479331	0
Business	Management	Associate Professor	5	7.16043	5	2.53839	1	0.166339	0	0.758858	0
Business	Management	Associate Professor	10	11.6024	9	3.63189	2	0.344488	0	1.32776	0
Business	Management	Full Professor	3	6.09544	4	1.59002	0	0.410701	0	1.04917	0
Business	Management	Full Professor	5	9.3449	7	2.50036	1	0.662328	0	1.78308	1
Business	Management	Full Professor	10	16.4946	12	3.56905	1	1.81996	0	3.67534	2
Business	Management Information Systems	Assistant Professor	3	3.32791	2	0.872629	0	0.0162602	0	0.097561	0
Business	Management Information Systems	Assistant Professor	5	4.42547	3	1.31436	0	0.0189702	0	0.132791	0
Business	Management Information Systems	Assistant Professor	10	5.54743	4	1.95122	0	0.0352304	0	0.262873	0
Business	Management Information Systems	Associate Professor	3	4.05866	3	0.698324	0	0.0418994	0	0.201117	0
Business	Management Information Systems	Associate Professor	5	6.08659	5	1.17877	0	0.0670391	0	0.318436	0
Business	Management Information Systems	Associate Professor	10	10.0279	8	1.86313	0	0.234637	0	0.639665	0
Business	Management Information Systems	Full Professor	3	6.87805	4	1.31504	0	0.288618	0	0.430894	0
Business	Management Information Systems	Full Professor	5	10.7317	7	2.09146	0	0.439024	0	0.772358	0
Business	Management Information Systems	Full Professor	10	18.4797	13	3.42683	0	1.38008	0	1.90854	1
Business	Marketing	Assistant Professor	3	3.12329	2	0.436399	0	0.0195695	0	0.264188	0
Business	Marketing	Assistant Professor	5	4.08806	3	0.606654	0	0.0332681	0	0.387476	0
Business	Marketing	Assistant Professor	10	5.06262	4	0.716243	0	0.0469667	0	0.561644	0
Business	Marketing	Associate Professor	3	4.13082	3	0.634409	0	0.0681004	0	0.460573	0
Business	Marketing	Associate Professor	5	6.11828	5	1.21864	0	0.11828	0	0.784946	0
Business	Marketing	Associate Professor	10	9.89427	8	1.44444	0	0.292115	0	1.3638	0
Business	Marketing	Full Professor	3	5.34015	4	0.655474	0	0.264234	0	0.983942	0
Business	Marketing	Full Professor	5	8.1562	6	1.79854	0	0.448175	0	1.74745	1
Business	Marketing	Full Professor	10	14.146	10	2.03796	0	1.13139	0	3.21898	2
Education	Counselor Education	Assistant Professor	3	5.26316	3	0.0804954	0	0.0804954	0	0.625387	0
Education	Counselor Education	Assistant Professor	5	6.7678	4	0.0959752	0	0.105263	0	0.885449	0
Education	Counselor Education	Assistant Professor	10	7.88854	5	0.0990712	0	0.130031	0	1.07121	0
Education	Counselor Education	Associate Professor	3	5.07843	3	0.0644258	0	0.187675	0	0.955182	0
Education	Counselor Education	Associate Professor	5	7.45098	5	0.0868347	0	0.266106	0	1.47339	0
Education	Counselor Education	Associate Professor	10	10.7815	7	0.123249	0	0.509804	0	2.48739	1
Education	Counselor Education	Full Professor	3	6.64058	4	0.136232	0	0.498551	0	1.62319	0
Education	Counselor Education	Full Professor	5	9.84348	6	0.165217	0	0.785507	0	2.82029	1
Education	Counselor Education	Full Professor	10	15.8058	11	0.234783	0	1.89855	1	5.01449	3
Education	Curriculum and Instruction	Assistant Professor	3	4.18024	3	0.285962	0	0.143847	0	0.911612	0
Education	Curriculum and Instruction	Assistant Professor	5	5.16291	4	0.410745	0	0.206239	0	1.22704	0
Education	Curriculum and Instruction	Assistant Professor	10	6.0208	5	0.500867	0	0.258232	0	1.49567	1
Education	Curriculum and Instruction	Associate Professor	3	4.13517	2	0.263158	0	0.358852	0	1.42105	1
Education	Curriculum and Instruction	Associate Professor	5	6.08134	4	0.357656	0	0.488038	0	2.0945	1
Education	Curriculum and Instruction	Associate Professor	10	9.08134	6	0.456938	0	0.922249	0	3.01555	2
Education	Curriculum and Instruction	Full Professor	3	4.41997	3	0.212922	0	0.694567	0	2.04993	1
Education	Curriculum and Instruction	Full Professor	5	6.46549	4	0.301028	0	1.09104	0	3.2232	2
Education	Curriculum and Instruction	Full Professor	10	10.21	7	0.41116	0	2.8649	1	5.43465	4
Education	Education, General	Assistant Professor	3	4.656	3	0.2288	0	0.128	0	0.8288	0
Education	Education, General	Assistant Professor	5	5.96	4	0.3104	0	0.168	0	1.0912	0
Education	Education, General	Assistant Professor	10	7.0608	4	0.4176	0	0.2256	0	1.4144	0
Education	Education, General	Associate Professor	3	4.49264	2	0.298527	0	0.282463	0	1.06426	0
Education	Education, General	Associate Professor	5	6.51807	4	0.432396	0	0.409639	0	1.68407	1
Education	Education, General	Associate Professor	10	9.47523	6	0.614458	0	0.768407	0	2.61981	1
Education	Education, General	Full Professor	3	7.1445	4	0.219949	0	0.7289	0	2.33504	1
Education	Education, General	Full Professor	5	10.4795	6	0.297954	0	1.0601	0	3.71995	2
Education	Education, General	Full Professor	10	16.5396	10	0.429668	0	2.84399	2	6.64194	4
Education	Educational Evaluation and Research	Assistant Professor	3	7.71951	6	0.121951	0	0.134146	0	0.780488	0
Education	Educational Evaluation and Research	Assistant Professor	5	9.5	6.5	0.195122	0	0.158537	0	1	0
Education	Educational Evaluation and Research	Assistant Professor	10	10.9512	8	0.243902	0	0.195122	0	1.20732	0
Education	Educational Evaluation and Research	Associate Professor	3	5.13265	3	0.132653	0	0.27551	0	1.14286	0
Education	Educational Evaluation and Research	Associate Professor	5	7.7551	5.5	0.22449	0	0.387755	0	1.95918	1
Education	Educational Evaluation and Research	Associate Professor	10	11.3061	9	0.306122	0	0.72449	0	3.13265	2
Education	Educational Evaluation and Research	Full Professor	3	8.40769	6	0.238462	0	0.676923	0	2.26154	2
Education	Educational Evaluation and Research	Full Professor	5	12.1769	9	0.353846	0	1.00769	0	3.6	2
Education	Educational Evaluation and Research	Full Professor	10	19.4462	15	0.507692	0	2.50769	2	6.68462	5
Education	Educational Leadership and Administration	Assistant Professor	3	4.30725	3	0.124046	0	0.160305	0	0.805344	0
Education	Educational Leadership and Administration	Assistant Professor	5	5.41221	4	0.146947	0	0.211832	0	1.09733	0
Education	Educational Leadership and Administration	Assistant Professor	10	6.35115	4.5	0.166031	0	0.272901	0	1.31298	0
Education	Educational Leadership and Administration	Associate Professor	3	4.26757	3	0.193243	0	0.374324	0	1.33514	0
Education	Educational Leadership and Administration	Associate Professor	5	6.27838	4	0.271622	0	0.547297	0	2.10135	1
Education	Educational Leadership and Administration	Associate Professor	10	9.23243	7	0.393243	0	0.954054	0	3.18378	2
Education	Educational Leadership and Administration	Full Professor	3	4.95862	3	0.144828	0	0.824828	0	2.11586	1
Education	Educational Leadership and Administration	Full Professor	5	7.51586	5	0.204138	0	1.27862	0	3.58483	2
Education	Educational Leadership and Administration	Full Professor	10	12.3159	8	0.29931	0	3.08	1	6.26759	4
Education	Foundations of Education	Assistant Professor	3	4.53097	4	0.079646	0	0.221239	0	0.911504	0
Education	Foundations of Education	Assistant Professor	5	5.82301	4	0.159292	0	0.274336	0	1.30088	0
Education	Foundations of Education	Assistant Professor	10	7.20354	6	0.230088	0	0.327434	0	1.63717	1
Education	Foundations of Education	Associate Professor	3	4.58721	3	0.238372	0	0.354651	0	1.22093	1
Education	Foundations of Education	Associate Professor	5	6.69767	5	0.27907	0	0.569767	0	1.98256	1
Education	Foundations of Education	Associate Professor	10	10	8	0.348837	0	1.01744	0	3.09302	2
Education	Foundations of Education	Full Professor	3	4.0365	2	0.0875912	0	0.59854	0	1.83212	1
Education	Foundations of Education	Full Professor	5	6.0438	4	0.131387	0	0.905109	0	3.0438	2
Education	Foundations of Education	Full Professor	10	9.64234	7	0.233577	0	2.28467	1	5.35766	4
Education	Higher Education/Higher Education Administration	Assistant Professor	3	5.64948	4	0.154639	0	0.247423	0	1.04124	0
Education	Higher Education/Higher Education Administration	Assistant Professor	5	6.80412	5	0.185567	0	0.309278	0	1.27835	0
Education	Higher Education/Higher Education Administration	Assistant Professor	10	7.84536	6	0.195876	0	0.360825	0	1.50515	0
Education	Higher Education/Higher Education Administration	Associate Professor	3	5.65	4.5	0.208333	0	0.466667	0	1.575	1
Education	Higher Education/Higher Education Administration	Associate Professor	5	8.04167	6	0.258333	0	0.6	0	2.5	1
Education	Higher Education/Higher Education Administration	Associate Professor	10	11.675	10	0.291667	0	1.09167	0	3.76667	2
Education	Higher Education/Higher Education Administration	Full Professor	3	6.4537	4	0.0648148	0	0.805556	0	2.67593	2
Education	Higher Education/Higher Education Administration	Full Professor	5	9.94444	7	0.0648148	0	1.14815	1	4.16667	3
Education	Higher Education/Higher Education Administration	Full Professor	10	15.9815	12	0.0740741	0	2.87037	2	7.50926	5
Education	Mathematics Education	Assistant Professor	3	3.44231	3	0.192308	0	0.115385	0	0.596154	0
Education	Mathematics Education	Assistant Professor	5	4.42308	4	0.365385	0	0.115385	0	0.711538	0
Education	Mathematics Education	Assistant Professor	10	5.21154	4	0.538462	0	0.115385	0	0.884615	0
Education	Mathematics Education	Associate Professor	3	3.17308	2	0.0384615	0	0.134615	0	0.769231	0
Education	Mathematics Education	Associate Professor	5	5.38462	4	0.192308	0	0.211538	0	1.46154	0
Education	Mathematics Education	Associate Professor	10	7.96154	6.5	0.384615	0	0.403846	0	2.21154	1
Education	Mathematics Education	Full Professor	3	5.5	4	0.712121	0	0.651515	0	1.66667	0
Education	Mathematics Education	Full Professor	5	8.5303	6.5	1.10606	0	1.01515	0	2.77273	1
Education	Mathematics Education	Full Professor	10	13.7273	10.5	1.71212	0	2.54545	1	4.71212	2
Education	Science Education	Assistant Professor	3	2.59459	3	0.162162	0	0.108108	0	0.675676	0
Education	Science Education	Assistant Professor	5	3.13514	3	0.27027	0	0.108108	0	0.837838	0
Education	Science Education	Assistant Professor	10	3.75676	3	0.405405	0	0.108108	0	1.02703	0
Education	Science Education	Associate Professor	3	3.13636	2	0.0454545	0	0.159091	0	0.886364	0
Education	Science Education	Associate Professor	5	5.63636	4	0.227273	0	0.25	0	1.70455	0.5
Education	Science Education	Associate Professor	10	8.09091	7	0.454545	0	0.477273	0	2.54545	1
Education	Science Education	Full Professor	3	6.19149	5	0.787234	0	0.723404	0	2.19149	2
Education	Science Education	Full Professor	5	9.55319	7	1.34043	0	1.08511	1	3.61702	3
Education	Science Education	Full Professor	10	14.7234	11	2.17021	0	2.61702	2	5.87234	5
Education	Special Education	Assistant Professor	3	5.27757	4	0.140684	0	0.0722433	0	0.475285	0
Education	Special Education	Assistant Professor	5	6.48669	5	0.174905	0	0.0912548	0	0.69962	0
Education	Special Education	Assistant Professor	10	7.59316	6	0.205323	0	0.136882	0	0.901141	0
Education	Special Education	Associate Professor	3	6.04332	3	0.0505415	0	0.216606	0	0.888087	0
Education	Special Education	Associate Professor	5	8.78339	5	0.0830325	0	0.303249	0	1.38267	0
Education	Special Education	Associate Professor	10	12.8267	9	0.111913	0	0.628159	0	2.34296	1
Education	Special Education	Full Professor	3	8.74597	5	0.145161	0	0.475806	0	1.89919	1
Education	Special Education	Full Professor	5	12.8387	7.5	0.217742	0	0.725806	0	3.02016	1
Education	Special Education	Full Professor	10	20.7863	12	0.314516	0	2.0121	1	5.1371	3
Education	Teacher Education Specific Levels	Assistant Professor	3	3.60902	3	0.259398	0	0.169173	0	0.796992	0
Education	Teacher Education Specific Levels	Assistant Professor	5	4.45865	3	0.334586	0	0.199248	0	1.00752	0
Education	Teacher Education Specific Levels	Assistant Professor	10	5.17669	4	0.406015	0	0.255639	0	1.19173	0
Education	Teacher Education Specific Levels	Associate Professor	3	3.41687	2	0.431325	0	0.306024	0	1.32771	0
Education	Teacher Education Specific Levels	Associate Professor	5	5.0988	3	0.573494	0	0.421687	0	1.85542	1
Education	Teacher Education Specific Levels	Associate Professor	10	7.51084	5	0.795181	0	0.766265	0	2.76386	1
Education	Teacher Education Specific Levels	Full Professor	3	3.62662	2	0.204545	0	0.503247	0	1.32468	0
Education	Teacher Education Specific Levels	Full Professor	5	5.40584	3	0.321429	0	0.837662	0	2.0974	1
Education	Teacher Education Specific Levels	Full Professor	10	8.51299	6	0.477273	0	2.74675	1	3.8961	2
Education	Teacher Education Specific Subject Areas	Assistant Professor	3	4.6938	3	0.554264	0	0.0930233	0	0.48062	0
Education	Teacher Education Specific Subject Areas	Assistant Professor	5	5.7907	4	0.686047	0	0.112403	0	0.689922	0
Education	Teacher Education Specific Subject Areas	Assistant Professor	10	6.76357	4	0.767442	0	0.147287	0	0.864341	0
Education	Teacher Education Specific Subject Areas	Associate Professor	3	3.87593	2	0.260546	0	0.290323	0	1.08189	0
Education	Teacher Education Specific Subject Areas	Associate Professor	5	5.54342	3	0.369727	0	0.419355	0	1.6129	0
Education	Teacher Education Specific Subject Areas	Associate Professor	10	8.20844	6	0.560794	0	0.722084	0	2.34739	1
Education	Teacher Education Specific Subject Areas	Full Professor	3	4.76804	2	0.381443	0	0.528351	0	1.93041	1
Education	Teacher Education Specific Subject Areas	Full Professor	5	7.04897	3	0.518041	0	0.760309	0	2.97423	1
Education	Teacher Education Specific Subject Areas	Full Professor	10	11.3067	6	0.791237	0	1.98969	1	4.99227	2
Engineering	Aerospace Engineering	Assistant Professor	3	9.41901	7	6.67819	4	0.0410367	0	0.12743	0
Engineering	Aerospace Engineering	Assistant Professor	5	12.5832	10	8.74946	5	0.0561555	0	0.267819	0
Engineering	Aerospace Engineering	Assistant Professor	10	16.5594	13	11.7473	7	0.0820734	0	0.557235	0
Engineering	Aerospace Engineering	Associate Professor	3	11.2714	8	7.04762	3	0.0904762	0	0.204762	0
Engineering	Aerospace Engineering	Associate Professor	5	15.9	13	10.1238	5	0.111905	0	0.402381	0
Engineering	Aerospace Engineering	Associate Professor	10	23.1595	19	16.119	9	0.228571	0	0.814286	0
Engineering	Aerospace Engineering	Full Professor	3	14.7002	10	8.5855	4	0.187229	0	0.402597	0
Engineering	Aerospace Engineering	Full Professor	5	22.4762	15	12.9426	7	0.279221	0	0.708874	0
Engineering	Aerospace Engineering	Full Professor	10	36.684	26	24.0833	13	0.861472	0	1.579	0
Engineering	Agricultural/Biological Engineering and Bioengineering	Assistant Professor	3	12.131	10	1.04158	0	0.029106	0	0.18711	0
Engineering	Agricultural/Biological Engineering and Bioengineering	Assistant Professor	5	17.0187	15	1.3763	0	0.029106	0	0.31185	0
Engineering	Agricultural/Biological Engineering and Bioengineering	Assistant Professor	10	23.1414	20	2.40748	0	0.043659	0	0.528067	0
Engineering	Agricultural/Biological Engineering and Bioengineering	Associate Professor	3	17.1853	13	1.52155	0	0.0603448	0	0.403017	0
Engineering	Agricultural/Biological Engineering and Bioengineering	Associate Professor	5	24.4591	19	2.05603	0	0.0883621	0	0.665948	0
Engineering	Agricultural/Biological Engineering and Bioengineering	Associate Professor	10	35.8556	30	4.03017	1	0.181034	0	1.25862	0
Engineering	Agricultural/Biological Engineering and Bioengineering	Full Professor	3	26.3574	18	2.25434	0	0.172447	0	0.7158	0
Engineering	Agricultural/Biological Engineering and Bioengineering	Full Professor	5	39.58	28	3.2842	1	0.250482	0	1.26301	0
Engineering	Agricultural/Biological Engineering and Bioengineering	Full Professor	10	64.0125	47	6.53372	2	0.738921	0	2.53565	1
Engineering	Biomedical Engineering	Assistant Professor	3	11.7536	10	2.825	0	0.0285714	0	0.2625	0
Engineering	Biomedical Engineering	Assistant Professor	5	16.5982	14	3.78929	0	0.0339286	0	0.439286	0
Engineering	Biomedical Engineering	Assistant Professor	10	23.425	21	5.88393	1	0.0517857	0	0.7625	0
Engineering	Biomedical Engineering	Associate Professor	3	15.3773	12	3.24908	0.5	0.0494505	0	0.452381	0
Engineering	Biomedical Engineering	Associate Professor	5	22.6868	19	4.77289	1	0.0805861	0	0.857143	0
Engineering	Biomedical Engineering	Associate Professor	10	34.2674	29	8.21978	2	0.18315	0	1.48352	0
Engineering	Biomedical Engineering	Full Professor	3	25.2242	18	3.94657	1	0.149826	0	0.87921	0
Engineering	Biomedical Engineering	Full Professor	5	38.4181	28	6.01974	1	0.235772	0	1.60046	1
Engineering	Biomedical Engineering	Full Professor	10	63.2091	47	12.0395	4	0.811847	0	3.03949	2
Engineering	Chemical Engineering	Assistant Professor	3	12.4732	11	0.640468	0	0.0234114	0	0.167224	0
Engineering	Chemical Engineering	Assistant Professor	5	17.5769	15	0.914716	0	0.0317726	0	0.284281	0
Engineering	Chemical Engineering	Assistant Professor	10	24.2007	20	1.29766	0	0.0468227	0	0.436455	0
Engineering	Chemical Engineering	Associate Professor	3	16.9851	12	0.946097	0	0.0539033	0	0.306691	0
Engineering	Chemical Engineering	Associate Professor	5	23.9312	18	1.36989	0	0.0724907	0	0.477695	0
Engineering	Chemical Engineering	Associate Professor	10	34.2138	28	2.03346	0	0.150558	0	0.847584	0
Engineering	Chemical Engineering	Full Professor	3	25.0079	17	1.60346	0	0.154996	0	0.577498	0
Engineering	Chemical Engineering	Full Professor	5	37.7364	27	2.18725	0	0.226593	0	0.940205	0
Engineering	Chemical Engineering	Full Professor	10	61.3257	45	3.55547	1	0.701023	0	1.93863	1
Engineering	Civil Engineering	Assistant Professor	3	10.8356	9	2.21528	1	0.0300926	0	0.173611	0
Engineering	Civil Engineering	Assistant Professor	5	14.2338	12	2.94792	1	0.0405093	0	0.246528	0
Engineering	Civil Engineering	Assistant Professor	10	17.985	15	3.80671	2	0.0659722	0	0.429398	0
Engineering	Civil Engineering	Associate Professor	3	12.8571	10	2.62412	1	0.0702576	0	0.30445	0
Engineering	Civil Engineering	Associate Professor	5	18.0656	15	3.97307	1	0.0901639	0	0.434426	0
Engineering	Civil Engineering	Associate Professor	10	25.4251	22	6.15691	3	0.206089	0	0.814988	0
Engineering	Civil Engineering	Full Professor	3	17.739	13	2.82961	1	0.159517	0	0.447734	0
Engineering	Civil Engineering	Full Professor	5	26.0713	19	4.30695	2	0.24713	0	0.682175	0
Engineering	Civil Engineering	Full Professor	10	40.4918	31	7.65559	3	0.829607	0	1.47432	0
Engineering	Computer Engineering	Assistant Professor	3	7.97267	6	11.2178	9	0.0657558	0	0.256191	0
Engineering	Computer Engineering	Assistant Professor	5	10.6883	8	15.3886	12	0.0964987	0	0.430401	0
Engineering	Computer Engineering	Assistant Professor	10	13.9855	10	20.7472	17	0.128096	0	0.746371	0
Engineering	Computer Engineering	Associate Professor	3	8.98686	6	11.6256	7	0.117406	0	0.285714	0
Engineering	Computer Engineering	Associate Professor	5	12.9253	8	17.0041	11	0.151888	0	0.475369	0
Engineering	Computer Engineering	Associate Professor	10	19.2841	14	26.5509	20	0.3711	0	1.06158	0
Engineering	Computer Engineering	Full Professor	3	14.2685	8	14.5502	10	0.203986	0	0.431419	0
Engineering	Computer Engineering	Full Professor	5	21.3052	12	22.6624	16	0.313013	0	0.784291	0
Engineering	Computer Engineering	Full Professor	10	34.8324	22	39.823	30	1.18992	0	1.9535	1
Engineering	Electrical Engineering	Assistant Professor	3	8.78926	7	11.543	9	0.0636364	0	0.244628	0
Engineering	Electrical Engineering	Assistant Professor	5	11.8041	9	15.6521	13	0.092562	0	0.393388	0
Engineering	Electrical Engineering	Assistant Professor	10	15.6355	12	21.2587	17	0.130579	0	0.671074	0
Engineering	Electrical Engineering	Associate Professor	3	10.0371	6	11.6071	7	0.10897	0	0.285397	0
Engineering	Electrical Engineering	Associate Professor	5	14.3729	10	17.0971	11	0.146034	0	0.4596	0
Engineering	Electrical Engineering	Associate Professor	10	21.3076	16	26.6368	20	0.375834	0	0.992587	0
Engineering	Electrical Engineering	Full Professor	3	15.3712	9	15.0466	10	0.204008	0	0.426084	0
Engineering	Electrical Engineering	Full Professor	5	23.0795	14	23.4678	16	0.308476	0	0.763141	0
Engineering	Electrical Engineering	Full Professor	10	37.9244	25	41.2237	30	1.21583	0	1.85381	1
Engineering	Engineering Mechanics	Assistant Professor	3	10.481	9	5.77215	3	0.0253165	0	0.151899	0
Engineering	Engineering Mechanics	Assistant Professor	5	13.8861	13	7.43038	4	0.0253165	0	0.316456	0
Engineering	Engineering Mechanics	Assistant Professor	10	18.6456	16	10.5063	6	0.0253165	0	0.696203	0
Engineering	Engineering Mechanics	Associate Professor	3	12.8571	11	5.54545	2	0.0779221	0	0.285714	0
Engineering	Engineering Mechanics	Associate Professor	5	18.6104	18	7.96104	3	0.103896	0	0.428571	0
Engineering	Engineering Mechanics	Associate Professor	10	26.5065	25	12.6623	5	0.181818	0	1.07792	0
Engineering	Engineering Mechanics	Full Professor	3	18.1333	12.5	5.40556	1	0.155556	0	0.338889	0
Engineering	Engineering Mechanics	Full Professor	5	27.2278	19	8.10556	3	0.183333	0	0.561111	0
Engineering	Engineering Mechanics	Full Professor	10	43.0389	31	15.4611	6	0.844444	0	1.35	0
Engineering	Engineering, General	Assistant Professor	3	8.23649	6	4.72297	2	0.0675676	0	0.236486	0
Engineering	Engineering, General	Assistant Professor	5	11.6486	9	6.5	2	0.0743243	0	0.378378	0
Engineering	Engineering, General	Assistant Professor	10	15.8378	12	8.87838	3.5	0.0945946	0	0.554054	0
Engineering	Engineering, General	Associate Professor	3	8.13953	4	5.41085	2	0.100775	0	0.263566	0
Engineering	Engineering, General	Associate Professor	5	12.1473	6	8.34884	4	0.162791	0	0.395349	0
Engineering	Engineering, General	Associate Professor	10	18.3721	9	13.2326	5	0.465116	0	0.883721	0
Engineering	Engineering, General	Full Professor	3	16.0543	9	6.29864	1	0.217195	0	0.723982	0
Engineering	Engineering, General	Full Professor	5	24.6244	13	9.26244	2	0.285068	0	1.17647	0
Engineering	Engineering, General	Full Professor	10	40.6154	24	16.6878	5	0.986425	0	2.40724	1
Engineering	Engineering, various	Assistant Professor	3	7.26186	5	4.35464	1	0.0474227	0	0.158763	0
Engineering	Engineering, various	Assistant Professor	5	9.72371	6	5.74021	2	0.0618557	0	0.243299	0
Engineering	Engineering, various	Assistant Professor	10	12.6598	8	7.20825	2	0.0907216	0	0.451546	0
Engineering	Engineering, various	Associate Professor	3	8.41071	4	4.76389	1	0.0873016	0	0.224206	0
Engineering	Engineering, various	Associate Professor	5	11.6746	6.5	7.06746	2	0.113095	0	0.424603	0
Engineering	Engineering, various	Associate Professor	10	16.6905	10	10.5556	4	0.255952	0	0.795635	0
Engineering	Engineering, various	Full Professor	3	13.6484	8	6.07763	1	0.171994	0	0.377473	0
Engineering	Engineering, various	Full Professor	5	19.8493	13	9.4277	2	0.269406	0	0.712329	0
Engineering	Engineering, various	Full Professor	10	31.0457	20	15.4505	4	0.802131	0	1.52511	0
Engineering	Environmental Engineering	Assistant Professor	3	12.2127	10	1.85384	0	0.0332851	0	0.182344	0
Engineering	Environmental Engineering	Assistant Professor	5	16.2127	14	2.50362	1	0.0477569	0	0.270622	0
Engineering	Environmental Engineering	Assistant Professor	10	20.6266	17	3.26339	1	0.0738061	0	0.438495	0
Engineering	Environmental Engineering	Associate Professor	3	13.8825	11	2.5256	1	0.064759	0	0.317771	0
Engineering	Environmental Engineering	Associate Professor	5	19.4142	16	3.81627	1	0.0828313	0	0.457831	0
Engineering	Environmental Engineering	Associate Professor	10	27.4413	23	5.93976	2	0.194277	0	0.856928	0
Engineering	Environmental Engineering	Full Professor	3	19.8447	14	2.5078	1	0.156028	0	0.468085	0
Engineering	Environmental Engineering	Full Professor	5	29.2135	21	3.8078	1	0.248227	0	0.720567	0
Engineering	Environmental Engineering	Full Professor	10	45.6716	35	6.86383	3	0.849645	0	1.55177	0
Engineering	Geological and Mining Engineering	Assistant Professor	3	9.23404	8	4.14894	2	0.0106383	0	0.0425532	0
Engineering	Geological and Mining Engineering	Assistant Professor	5	11.9468	10	4.91489	2.5	0.0212766	0	0.0851064	0
Engineering	Geological and Mining Engineering	Assistant Professor	10	14.734	11.5	5.64894	3	0.0319149	0	0.138298	0
Engineering	Geological and Mining Engineering	Associate Professor	3	11.7093	6.5	6.26744	1	0.0465116	0	0.127907	0
Engineering	Geological and Mining Engineering	Associate Professor	5	15.6744	10	7.73256	2	0.0581395	0	0.22093	0
Engineering	Geological and Mining Engineering	Associate Professor	10	20.0698	12.5	9.5	3	0.151163	0	0.604651	0
Engineering	Geological and Mining Engineering	Full Professor	3	15.9934	11	4.3245	1	0.15894	0	0.231788	0
Engineering	Geological and Mining Engineering	Full Professor	5	22.596	16	5.80795	2	0.205298	0	0.490066	0
Engineering	Geological and Mining Engineering	Full Professor	10	34.4702	26	8.96689	3	0.701987	0	1.36424	0
Engineering	Industrial Engineering	Assistant Professor	3	8.85678	7	3.33668	2	0.0502513	0	0.175879	0
Engineering	Industrial Engineering	Assistant Professor	5	11.6106	8.5	4.46482	2	0.0703518	0	0.258794	0
Engineering	Industrial Engineering	Assistant Professor	10	14.5377	11	5.98995	3	0.105528	0	0.472362	0
Engineering	Industrial Engineering	Associate Professor	3	10.125	7	3.70427	1	0.0579268	0	0.170732	0
Engineering	Industrial Engineering	Associate Professor	5	14.2988	11	5.64024	2	0.0823171	0	0.29878	0
Engineering	Industrial Engineering	Associate Professor	10	20.4726	15.5	8.53049	4	0.271341	0	0.640244	0
Engineering	Industrial Engineering	Full Professor	3	12.2505	9	3.11797	1	0.23412	0	0.419238	0
Engineering	Industrial Engineering	Full Professor	5	18.2613	13	4.98367	2	0.373866	0	0.742287	0
Engineering	Industrial Engineering	Full Professor	10	29.6279	23	9.15971	4	1.43376	0	1.81307	1
Engineering	Materials Engineering	Assistant Professor	3	12.25	9.5	2.5	0	0.00862069	0	0.189655	0
Engineering	Materials Engineering	Assistant Professor	5	17.2586	14	3.2931	1	0.0431034	0	0.318966	0
Engineering	Materials Engineering	Assistant Professor	10	24.0948	18.5	4.32759	1	0.0517241	0	0.474138	0
Engineering	Materials Engineering	Associate Professor	3	12.7255	10.5	3.76471	1	0.0784314	0	0.176471	0
Engineering	Materials Engineering	Associate Professor	5	18.1471	15	5.03922	1	0.0980392	0	0.303922	0
Engineering	Materials Engineering	Associate Professor	10	26.2451	23	6.79412	2.5	0.27451	0	0.529412	0
Engineering	Materials Engineering	Full Professor	3	28.2112	17	4.17131	1	0.179283	0	0.653386	0
Engineering	Materials Engineering	Full Professor	5	41.9402	23	5.79283	2	0.282869	0	0.928287	0
Engineering	Materials Engineering	Full Professor	10	66.5339	40	9.75697	3	0.85259	0	1.67729	1
Engineering	Materials Science and Engineering	Assistant Professor	3	16.072	12	1.67313	0	0.0415512	0	0.196676	0
Engineering	Materials Science and Engineering	Assistant Professor	5	22.0388	17	2.25485	1	0.0443213	0	0.310249	0
Engineering	Materials Science and Engineering	Assistant Professor	10	30.2022	24	3.0831	1	0.0692521	0	0.487535	0
Engineering	Materials Science and Engineering	Associate Professor	3	23.4742	15	1.81763	0	0.0516717	0	0.261398	0
Engineering	Materials Science and Engineering	Associate Professor	5	33.3222	22	2.42857	1	0.0911854	0	0.407295	0
Engineering	Materials Science and Engineering	Associate Professor	10	48.8328	32	4.48632	1	0.179331	0	0.720365	0
Engineering	Materials Science and Engineering	Full Professor	3	35.3282	23	3.66769	1	0.172308	0	0.594872	0
Engineering	Materials Science and Engineering	Full Professor	5	52.759	35	5.09128	1	0.282051	0	0.93641	0
Engineering	Materials Science and Engineering	Full Professor	10	84.3672	59	9.27897	3	0.897436	0	1.90359	1
Engineering	Mechanical Engineering	Assistant Professor	3	10.6667	8	4.51466	2	0.0378086	0	0.154321	0
Engineering	Mechanical Engineering	Assistant Professor	5	14.5625	12	5.97222	3	0.0462963	0	0.253086	0
Engineering	Mechanical Engineering	Assistant Professor	10	19.2114	16	8.25617	5	0.0655864	0	0.445216	0
Engineering	Mechanical Engineering	Associate Professor	3	12.8434	9	5.16707	2	0.0750605	0	0.250202	0
Engineering	Mechanical Engineering	Associate Professor	5	18.0928	13	7.61905	3	0.0976594	0	0.399516	0
Engineering	Mechanical Engineering	Associate Professor	10	26.6231	21	12.5061	7	0.196933	0	0.770783	0
Engineering	Mechanical Engineering	Full Professor	3	17.786	12	6.36594	3	0.191703	0	0.420524	0
Engineering	Mechanical Engineering	Full Professor	5	26.7022	18	9.7607	4	0.292576	0	0.746725	0
Engineering	Mechanical Engineering	Full Professor	10	43.2162	30	18.1424	9	0.841048	0	1.62227	0
Engineering	Nuclear Engineering	Assistant Professor	3	12.1975	10	1.61728	0	0.037037	0	0.0987654	0
Engineering	Nuclear Engineering	Assistant Professor	5	16.642	15	2.37037	1	0.0493827	0	0.17284	0
Engineering	Nuclear Engineering	Assistant Professor	10	21.8272	19	3.83951	1	0.0864198	0	0.308642	0
Engineering	Nuclear Engineering	Associate Professor	3	13.4651	10	3.24419	1	0.127907	0	0.360465	0
Engineering	Nuclear Engineering	Associate Professor	5	19.0116	16.5	4.9186	3	0.127907	0	0.430233	0
Engineering	Nuclear Engineering	Associate Professor	10	26.9767	23	7.75581	5	0.151163	0	0.860465	0
Engineering	Nuclear Engineering	Full Professor	3	19.5389	15	4.03593	1	0.149701	0	0.413174	0
Engineering	Nuclear Engineering	Full Professor	5	29.6766	22	6.25749	2	0.209581	0	0.658683	0
Engineering	Nuclear Engineering	Full Professor	10	47.6707	35	11.2216	4	0.520958	0	1.35329	0
Engineering	Operations Research	Assistant Professor	3	4.02756	3	1.14173	0	0.019685	0	0.0905512	0
Engineering	Operations Research	Assistant Professor	5	5.38976	4	1.66929	0	0.023622	0	0.129921	0
Engineering	Operations Research	Assistant Professor	10	6.70079	4	2.48425	0	0.0433071	0	0.23622	0
Engineering	Operations Research	Associate Professor	3	5.84783	4	1.45217	0	0.0478261	0	0.169565	0
Engineering	Operations Research	Associate Professor	5	8.55217	6	2.17826	0	0.0826087	0	0.273913	0
Engineering	Operations Research	Associate Professor	10	13.3391	11	3.42609	0	0.2	0	0.595652	0
Engineering	Operations Research	Full Professor	3	8.65416	6	1.51206	0	0.268097	0	0.324397	0
Engineering	Operations Research	Full Professor	5	13.3673	9	2.30027	0	0.386059	0	0.546917	0
Engineering	Operations Research	Full Professor	10	22.3619	16	3.89276	1	1.23861	0	1.42091	0
Engineering	Systems Engineering	Assistant Professor	3	8.21481	6	3.82222	2	0.0740741	0	0.177778	0
Engineering	Systems Engineering	Assistant Professor	5	10.4889	8	5.12222	2	0.1	0	0.274074	0
Engineering	Systems Engineering	Assistant Professor	10	12.5852	10	6.77037	3	0.137037	0	0.488889	0
Engineering	Systems Engineering	Associate Professor	3	10.0991	8	5.16667	1	0.0810811	0	0.306306	0
Engineering	Systems Engineering	Associate Professor	5	14.2793	12	7.44595	2	0.126126	0	0.45045	0
Engineering	Systems Engineering	Associate Professor	10	20.6667	19	11.8604	5	0.355856	0	0.855856	0
Engineering	Systems Engineering	Full Professor	3	13.0156	9	6.21875	2	0.289062	0	0.625	0
Engineering	Systems Engineering	Full Professor	5	20.1328	16	9.5625	3	0.429688	0	1.11979	0
Engineering	Systems Engineering	Full Professor	10	33.4427	26	17.4401	7	1.78906	0	2.55208	1
Family, Consumer and Human Sciences	Architecture	Assistant Professor	3	2.56595	1	0.695444	0	0.105516	0	0.244604	0
Family, Consumer and Human Sciences	Architecture	Assistant Professor	5	3.46283	1	0.899281	0	0.139089	0	0.316547	0
Family, Consumer and Human Sciences	Architecture	Assistant Professor	10	4.15588	1	1.09353	0	0.206235	0	0.441247	0
Family, Consumer and Human Sciences	Architecture	Associate Professor	3	1.69792	0	0.4375	0	0.264323	0	0.479167	0
Family, Consumer and Human Sciences	Architecture	Associate Professor	5	2.39844	0	0.660156	0	0.390625	0	0.682292	0
Family, Consumer and Human Sciences	Architecture	Associate Professor	10	3.52995	1	1.03255	0	0.757812	0	1.08073	0
Family, Consumer and Human Sciences	Architecture	Full Professor	3	3.53145	0	0.584906	0	0.506289	0	0.889937	0
Family, Consumer and Human Sciences	Architecture	Full Professor	5	5.08019	0	0.866352	0	0.768868	0	1.44969	0
Family, Consumer and Human Sciences	Architecture	Full Professor	10	7.88208	1	1.51101	0	2.01572	1	2.39465	0
Family, Consumer and Human Sciences	Architecture, Design, Planning, various	Assistant Professor	3	2.573	1	0.818182	0	0.0633609	0	0.212121	0
Family, Consumer and Human Sciences	Architecture, Design, Planning, various	Assistant Professor	5	3.36915	1	1.05234	0	0.077135	0	0.278237	0
Family, Consumer and Human Sciences	Architecture, Design, Planning, various	Assistant Professor	10	4.31129	2	1.26722	0	0.0991736	0	0.341598	0
Family, Consumer and Human Sciences	Architecture, Design, Planning, various	Associate Professor	3	1.85655	0	0.403326	0	0.18711	0	0.361746	0
Family, Consumer and Human Sciences	Architecture, Design, Planning, various	Associate Professor	5	2.71102	1	0.634096	0	0.239085	0	0.52183	0
Family, Consumer and Human Sciences	Architecture, Design, Planning, various	Associate Professor	10	4.10811	1	0.968815	0	0.469854	0	0.756757	0
Family, Consumer and Human Sciences	Architecture, Design, Planning, various	Full Professor	3	3.58562	1	0.511628	0	0.386892	0	0.801268	0
Family, Consumer and Human Sciences	Architecture, Design, Planning, various	Full Professor	5	5.33827	1	0.767442	0	0.651163	0	1.34038	0
Family, Consumer and Human Sciences	Architecture, Design, Planning, various	Full Professor	10	8.71247	2	1.19027	0	1.56025	0	2.31712	0
Family, Consumer and Human Sciences	Communication and Communication Studies	Assistant Professor	3	5.34016	4	0.274016	0	0.170079	0	0.675591	0
Family, Consumer and Human Sciences	Communication and Communication Studies	Assistant Professor	5	6.83622	5	0.36378	0	0.195276	0	0.880315	0
Family, Consumer and Human Sciences	Communication and Communication Studies	Assistant Professor	10	8.08189	6	0.499213	0	0.264567	0	1.11654	0
Family, Consumer and Human Sciences	Communication and Communication Studies	Associate Professor	3	3.81457	2	0.238411	0	0.281457	0	0.952539	0
Family, Consumer and Human Sciences	Communication and Communication Studies	Associate Professor	5	5.76049	3	0.365342	0	0.415011	0	1.44812	0
Family, Consumer and Human Sciences	Communication and Communication Studies	Associate Professor	10	8.9713	6	0.541943	0	0.775938	0	2.266	1
Family, Consumer and Human Sciences	Communication and Communication Studies	Full Professor	3	5.46889	2	0.324444	0	0.691111	0	1.86889	1
Family, Consumer and Human Sciences	Communication and Communication Studies	Full Professor	5	8.39778	4	0.48	0	1.01444	0	3.02222	2
Family, Consumer and Human Sciences	Communication and Communication Studies	Full Professor	10	13.7833	8	0.7	0	2.68667	1	5.68778	3
Family, Consumer and Human Sciences	Consumer and Human Sciences, various	Assistant Professor	3	5.77519	4	0.124031	0	0.0155039	0	0.116279	0
Family, Consumer and Human Sciences	Consumer and Human Sciences, various	Assistant Professor	5	7.32558	5	0.155039	0	0.0465116	0	0.224806	0
Family, Consumer and Human Sciences	Consumer and Human Sciences, various	Assistant Professor	10	8.89922	6	0.170543	0	0.0465116	0	0.302326	0
Family, Consumer and Human Sciences	Consumer and Human Sciences, various	Associate Professor	3	6.10345	3	0.351724	0	0.103448	0	0.365517	0
Family, Consumer and Human Sciences	Consumer and Human Sciences, various	Associate Professor	5	8.82069	5	0.517241	0	0.158621	0	0.668966	0
Family, Consumer and Human Sciences	Consumer and Human Sciences, various	Associate Professor	10	12.9862	8	0.565517	0	0.331034	0	1.04138	0
Family, Consumer and Human Sciences	Consumer and Human Sciences, various	Full Professor	3	11.5956	6.5	0.389706	0	0.389706	0	0.948529	0
Family, Consumer and Human Sciences	Consumer and Human Sciences, various	Full Professor	5	17.7132	10	0.647059	0	0.558824	0	1.69118	0.5
Family, Consumer and Human Sciences	Consumer and Human Sciences, various	Full Professor	10	30.4191	18.5	0.823529	0	0.992647	0	2.44853	1
Family, Consumer and Human Sciences	Family and Human Sciences, various	Assistant Professor	3	7.69163	6	0.185022	0	0.0440529	0	0.361233	0
Family, Consumer and Human Sciences	Family and Human Sciences, various	Assistant Professor	5	9.88106	8	0.22467	0	0.0572687	0	0.506608	0
Family, Consumer and Human Sciences	Family and Human Sciences, various	Assistant Professor	10	12.4846	9	0.281938	0	0.0881057	0	0.744493	0
Family, Consumer and Human Sciences	Family and Human Sciences, various	Associate Professor	3	6.34101	4	0.119816	0	0.170507	0	0.723502	0
Family, Consumer and Human Sciences	Family and Human Sciences, various	Associate Professor	5	9.17972	6	0.147465	0	0.271889	0	1.17051	0
Family, Consumer and Human Sciences	Family and Human Sciences, various	Associate Professor	10	14.0876	9	0.18894	0	0.56682	0	1.8894	1
Family, Consumer and Human Sciences	Family and Human Sciences, various	Full Professor	3	11.8219	5	0.260274	0	0.369863	0	1.46575	0
Family, Consumer and Human Sciences	Family and Human Sciences, various	Full Professor	5	16.6393	8	0.333333	0	0.575342	0	2.45205	1
Family, Consumer and Human Sciences	Family and Human Sciences, various	Full Professor	10	26.5479	14	0.474886	0	1.49772	1	4.22831	2
Family, Consumer and Human Sciences	Health Promotion, Kinesiology, Exercise Science and Rehab	Assistant Professor	3	11.8531	8	0.221154	0	0.0218531	0	0.263986	0
Family, Consumer and Human Sciences	Health Promotion, Kinesiology, Exercise Science and Rehab	Assistant Professor	5	15.958	11	0.299825	0	0.027972	0	0.397727	0
Family, Consumer and Human Sciences	Health Promotion, Kinesiology, Exercise Science and Rehab	Assistant Professor	10	19.917	13	0.412587	0	0.0498252	0	0.556818	0
Family, Consumer and Human Sciences	Health Promotion, Kinesiology, Exercise Science and Rehab	Associate Professor	3	14.2067	9	0.274088	0	0.0841908	0	0.45276	0
Family, Consumer and Human Sciences	Health Promotion, Kinesiology, Exercise Science and Rehab	Associate Professor	5	20.3171	12	0.37044	0	0.120674	0	0.695978	0
Family, Consumer and Human Sciences	Health Promotion, Kinesiology, Exercise Science and Rehab	Associate Professor	10	28.8924	19	0.54724	0	0.235734	0	1.09916	0
Family, Consumer and Human Sciences	Health Promotion, Kinesiology, Exercise Science and Rehab	Full Professor	3	23.0062	14	0.328497	0	0.21658	0	0.945078	0
Family, Consumer and Human Sciences	Health Promotion, Kinesiology, Exercise Science and Rehab	Full Professor	5	34.1295	22	0.480829	0	0.337824	0	1.56995	0
Family, Consumer and Human Sciences	Health Promotion, Kinesiology, Exercise Science and Rehab	Full Professor	10	52.1969	34	0.821762	0	0.93886	0	2.6715	1
Family, Consumer and Human Sciences	Health, Physical Education, Recreation	Assistant Professor	3	10.9033	8	0.144981	0	0.0408922	0	0.289963	0
Family, Consumer and Human Sciences	Health, Physical Education, Recreation	Assistant Professor	5	14.2082	9	0.163569	0	0.0520446	0	0.420074	0
Family, Consumer and Human Sciences	Health, Physical Education, Recreation	Assistant Professor	10	16.6952	11	0.189591	0	0.0557621	0	0.535316	0
Family, Consumer and Human Sciences	Health, Physical Education, Recreation	Associate Professor	3	10.8645	5	0.138554	0	0.123494	0	0.487952	0
Family, Consumer and Human Sciences	Health, Physical Education, Recreation	Associate Professor	5	15.5813	8	0.183735	0	0.180723	0	0.71988	0
Family, Consumer and Human Sciences	Health, Physical Education, Recreation	Associate Professor	10	21.6536	12.5	0.26506	0	0.337349	0	1.17771	0
Family, Consumer and Human Sciences	Health, Physical Education, Recreation	Full Professor	3	14.4767	9	0.204301	0	0.308244	0	1.00358	0
Family, Consumer and Human Sciences	Health, Physical Education, Recreation	Full Professor	5	21.2545	13	0.27957	0	0.444444	0	1.49104	0
Family, Consumer and Human Sciences	Health, Physical Education, Recreation	Full Professor	10	32.5448	21	0.34767	0	1.07885	0	2.55197	0
Family, Consumer and Human Sciences	Human Development and Family Studies, General	Assistant Professor	3	8.72589	6	0.0888325	0	0.0685279	0	0.428934	0
Family, Consumer and Human Sciences	Human Development and Family Studies, General	Assistant Professor	5	11.1751	8	0.137056	0	0.0862944	0	0.581218	0
Family, Consumer and Human Sciences	Human Development and Family Studies, General	Assistant Professor	10	13.5254	10	0.185279	0	0.109137	0	0.78934	0
Family, Consumer and Human Sciences	Human Development and Family Studies, General	Associate Professor	3	8.23567	6	0.201699	0	0.144374	0	0.723992	0
Family, Consumer and Human Sciences	Human Development and Family Studies, General	Associate Professor	5	11.6285	8	0.314225	0	0.197452	0	1.22505	0
Family, Consumer and Human Sciences	Human Development and Family Studies, General	Associate Professor	10	16.9066	13	0.443737	0	0.375796	0	1.87261	1
Family, Consumer and Human Sciences	Human Development and Family Studies, General	Full Professor	3	16.9898	10	0.20122	0	0.479675	0	2.06911	1
Family, Consumer and Human Sciences	Human Development and Family Studies, General	Full Professor	5	25.1992	14	0.300813	0	0.731707	0	3.56911	2
Family, Consumer and Human Sciences	Human Development and Family Studies, General	Full Professor	10	39.4573	24	0.47561	0	1.83333	1	6.10772	3
Family, Consumer and Human Sciences	Mass Communications/Media Studies	Assistant Professor	3	4.42045	3	0.376894	0	0.174242	0	0.602273	0
Family, Consumer and Human Sciences	Mass Communications/Media Studies	Assistant Professor	5	5.72348	4	0.501894	0	0.204545	0	0.75947	0
Family, Consumer and Human Sciences	Mass Communications/Media Studies	Assistant Professor	10	6.69508	4	0.668561	0	0.276515	0	0.941288	0
Family, Consumer and Human Sciences	Mass Communications/Media Studies	Associate Professor	3	2.96629	1	0.378277	0	0.29588	0	0.906367	0
Family, Consumer and Human Sciences	Mass Communications/Media Studies	Associate Professor	5	4.41948	2	0.605493	0	0.459426	0	1.40075	0
Family, Consumer and Human Sciences	Mass Communications/Media Studies	Associate Professor	10	6.63296	3	0.956305	0	0.922597	0	2.14482	0
Family, Consumer and Human Sciences	Mass Communications/Media Studies	Full Professor	3	3.60334	1	0.521181	0	0.715019	0	1.61232	0
Family, Consumer and Human Sciences	Mass Communications/Media Studies	Full Professor	5	5.38254	2	0.77792	0	1.02567	0	2.54429	1
Family, Consumer and Human Sciences	Mass Communications/Media Studies	Full Professor	10	8.60976	4	1.21309	0	2.64056	1	4.55199	1
Family, Consumer and Human Sciences	Nutrition Sciences	Assistant Professor	3	13.2561	11	0.115813	0	0.0222717	0	0.195991	0
Family, Consumer and Human Sciences	Nutrition Sciences	Assistant Professor	5	17.8775	15	0.135857	0	0.0267261	0	0.289532	0
Family, Consumer and Human Sciences	Nutrition Sciences	Assistant Professor	10	23.1359	19	0.160356	0	0.0601336	0	0.432071	0
Family, Consumer and Human Sciences	Nutrition Sciences	Associate Professor	3	15.8825	10	0.177419	0	0.0483871	0	0.373272	0
Family, Consumer and Human Sciences	Nutrition Sciences	Associate Professor	5	22.4078	15	0.195853	0	0.0829493	0	0.638249	0
Family, Consumer and Human Sciences	Nutrition Sciences	Associate Professor	10	31.7627	23	0.294931	0	0.182028	0	1.02074	0
Family, Consumer and Human Sciences	Nutrition Sciences	Full Professor	3	25.239	15	0.248566	0	0.189293	0	0.745698	0
Family, Consumer and Human Sciences	Nutrition Sciences	Full Professor	5	37.7533	22	0.305927	0	0.290631	0	1.18547	0
Family, Consumer and Human Sciences	Nutrition Sciences	Full Professor	10	60.2237	37	0.57935	0	0.82218	0	2.33461	1
Family, Consumer and Human Sciences	Urban and Regional Planning	Assistant Professor	3	5.94203	4	0.241546	0	0.135266	0	0.618357	0
Family, Consumer and Human Sciences	Urban and Regional Planning	Assistant Professor	5	7.52174	5	0.275362	0	0.169082	0	0.743961	0
Family, Consumer and Human Sciences	Urban and Regional Planning	Assistant Professor	10	9.00966	6	0.36715	0	0.21256	0	0.956522	0
Family, Consumer and Human Sciences	Urban and Regional Planning	Associate Professor	3	5.23256	3	0.159468	0	0.318937	0	0.750831	0
Family, Consumer and Human Sciences	Urban and Regional Planning	Associate Professor	5	7.6412	4	0.265781	0	0.418605	0	1.19601	0
Family, Consumer and Human Sciences	Urban and Regional Planning	Associate Professor	10	11.0631	7	0.425249	0	0.807309	0	2	1
Family, Consumer and Human Sciences	Urban and Regional Planning	Full Professor	3	6.65553	3	0.239075	0	0.694087	0	1.55013	0
Family, Consumer and Human Sciences	Urban and Regional Planning	Full Professor	5	9.69152	5	0.305913	0	1.05656	0	2.78406	1
Family, Consumer and Human Sciences	Urban and Regional Planning	Full Professor	10	15.7558	9	0.40617	0	2.70951	2	4.95373	2
Health Professions Sciences	Communication Disorders and Sciences	Assistant Professor	3	6.01575	5	0.0984252	0	0.0314961	0	0.19685	0
Health Professions Sciences	Communication Disorders and Sciences	Assistant Professor	5	7.87402	7	0.133858	0	0.0314961	0	0.259843	0
Health Professions Sciences	Communication Disorders and Sciences	Assistant Professor	10	10.1181	9	0.220472	0	0.0433071	0	0.409449	0
Health Professions Sciences	Communication Disorders and Sciences	Associate Professor	3	7.9272	5	0.295019	0	0.0613027	0	0.417625	0
Health Professions Sciences	Communication Disorders and Sciences	Associate Professor	5	11.2414	8	0.440613	0	0.0881226	0	0.639847	0
Health Professions Sciences	Communication Disorders and Sciences	Associate Professor	10	16.7893	12	0.659004	0	0.183908	0	1.11877	0
Health Professions Sciences	Communication Disorders and Sciences	Full Professor	3	11.5039	7	0.289062	0	0.347656	0	0.8125	0
Health Professions Sciences	Communication Disorders and Sciences	Full Professor	5	17.043	12	0.390625	0	0.535156	0	1.34766	0
Health Professions Sciences	Communication Disorders and Sciences	Full Professor	10	27.6445	19	0.761719	0	1.39844	0	2.39844	1
Health Professions Sciences	Environmental Health Sciences	Assistant Professor	3	13.0733	9	0.349138	0	0.00431034	0	0.12931	0
Health Professions Sciences	Environmental Health Sciences	Assistant Professor	5	17.4741	13	0.37931	0	0.00862069	0	0.193966	0
Health Professions Sciences	Environmental Health Sciences	Assistant Professor	10	23.6121	19	0.62931	0	0.0172414	0	0.310345	0
Health Professions Sciences	Environmental Health Sciences	Associate Professor	3	17.8651	13	0.465116	0	0.0418605	0	0.269767	0
Health Professions Sciences	Environmental Health Sciences	Associate Professor	5	26.0047	20	0.539535	0	0.0604651	0	0.553488	0
Health Professions Sciences	Environmental Health Sciences	Associate Professor	10	38.2558	30	1.04651	0	0.148837	0	0.972093	0
Health Professions Sciences	Environmental Health Sciences	Full Professor	3	29.739	18	0.842767	0	0.166667	0	0.672956	0
Health Professions Sciences	Environmental Health Sciences	Full Professor	5	44.6855	26	0.943396	0	0.235849	0	1.26101	0
Health Professions Sciences	Environmental Health Sciences	Full Professor	10	70.2138	43	2.86478	0	0.68239	0	2.46855	1
Health Professions Sciences	Health Professions, various	Assistant Professor	3	12.3906	8	0.311448	0	0.037037	0	0.244108	0
Health Professions Sciences	Health Professions, various	Assistant Professor	5	16.2054	10	0.395623	0	0.0555556	0	0.3367	0
Health Professions Sciences	Health Professions, various	Assistant Professor	10	19.8569	13	0.488215	0	0.0740741	0	0.491582	0
Health Professions Sciences	Health Professions, various	Associate Professor	3	15.5017	8.5	0.406667	0	0.118333	0	0.396667	0
Health Professions Sciences	Health Professions, various	Associate Professor	5	22.0933	13	0.543333	0	0.173333	0	0.635	0
Health Professions Sciences	Health Professions, various	Associate Professor	10	31.465	20	0.816667	0	0.411667	0	1.22	0
Health Professions Sciences	Health Professions, various	Full Professor	3	27.7005	17	0.473851	0	0.259905	0	0.938193	0
Health Professions Sciences	Health Professions, various	Full Professor	5	40.9223	25	0.671949	0	0.391442	0	1.49921	0
Health Professions Sciences	Health Professions, various	Full Professor	10	63.4311	42	1.12361	0	1.11727	0	2.99208	1
Health Professions Sciences	Medical Sciences, various	Assistant Professor	3	8.89908	5	0.614679	0	0.00917431	0	0.100917	0
Health Professions Sciences	Medical Sciences, various	Assistant Professor	5	12.1743	6	0.752294	0	0.0183486	0	0.165138	0
Health Professions Sciences	Medical Sciences, various	Assistant Professor	10	15.945	9	1.12844	0	0.0275229	0	0.330275	0
Health Professions Sciences	Medical Sciences, various	Associate Professor	3	13.3718	6.5	1	0	0.141026	0	0.461538	0
Health Professions Sciences	Medical Sciences, various	Associate Professor	5	19.3718	10.5	1.24359	0	0.230769	0	0.679487	0
Health Professions Sciences	Medical Sciences, various	Associate Professor	10	29.4103	18	1.53846	0	0.333333	0	1.19231	0
Health Professions Sciences	Medical Sciences, various	Full Professor	3	27.593	15.5	1.46512	0	0.116279	0	0.686047	0
Health Professions Sciences	Medical Sciences, various	Full Professor	5	42.1279	25	2.09302	0	0.232558	0	1.18605	0.5
Health Professions Sciences	Medical Sciences, various	Full Professor	10	67.5233	40.5	3.82558	0	0.593023	0	1.93023	1
Health Professions Sciences	Nursing	Assistant Professor	3	5.35373	2	0.0810023	0	0.0227273	0	0.240676	0
Health Professions Sciences	Nursing	Assistant Professor	5	6.90618	3	0.104312	0	0.0273893	0	0.299534	0
Health Professions Sciences	Nursing	Assistant Professor	10	8.26457	3	0.143939	0	0.0675991	0	0.390443	0
Health Professions Sciences	Nursing	Associate Professor	3	9.02981	6	0.0831075	0	0.0758808	0	0.514002	0
Health Professions Sciences	Nursing	Associate Professor	5	12.7877	8	0.113821	0	0.102981	0	0.747064	0
Health Professions Sciences	Nursing	Associate Professor	10	18.4995	13	0.160795	0	0.221319	0	1.20777	0
Health Professions Sciences	Nursing	Full Professor	3	15.6185	10	0.164103	0	0.21641	0	0.886154	0
Health Professions Sciences	Nursing	Full Professor	5	22.8656	14	0.228718	0	0.321026	0	1.45231	0
Health Professions Sciences	Nursing	Full Professor	10	35.48	24	0.427692	0	0.851282	0	2.49026	1
Health Professions Sciences	Pharmacy	Assistant Professor	3	8.14318	4	0.0961969	0	0.01566	0	0.176734	0
Health Professions Sciences	Pharmacy	Assistant Professor	5	10.5414	4	0.12528	0	0.0178971	0	0.248322	0
Health Professions Sciences	Pharmacy	Assistant Professor	10	13.1499	6	0.183445	0	0.0246085	0	0.369128	0
Health Professions Sciences	Pharmacy	Associate Professor	3	10.6601	6	0.129386	0	0.0328947	0	0.427632	0
Health Professions Sciences	Pharmacy	Associate Professor	5	15.9737	9	0.153509	0	0.0526316	0	0.640351	0
Health Professions Sciences	Pharmacy	Associate Professor	10	23.3553	14	0.232456	0	0.133772	0	1.1886	0
Health Professions Sciences	Pharmacy	Full Professor	3	19.352	11	0.550117	0	0.165501	0	0.846154	0
Health Professions Sciences	Pharmacy	Full Professor	5	29.6154	18	0.652681	0	0.235431	0	1.37529	0
Health Professions Sciences	Pharmacy	Full Professor	10	48.6923	29	0.969697	0	0.615385	0	2.57809	1
Health Professions Sciences	Public Health	Assistant Professor	3	14.17	11	0.275692	0	0.034585	0	0.264822	0
Health Professions Sciences	Public Health	Assistant Professor	5	18.7184	15	0.340909	0	0.0434783	0	0.364625	0
Health Professions Sciences	Public Health	Assistant Professor	10	23.2846	18	0.43083	0	0.0642292	0	0.530632	0
Health Professions Sciences	Public Health	Associate Professor	3	20.0186	14	0.323711	0	0.0835052	0	0.429897	0
Health Professions Sciences	Public Health	Associate Professor	5	28.7278	21	0.383505	0	0.118557	0	0.67732	0
Health Professions Sciences	Public Health	Associate Professor	10	41.1278	32	0.525773	0	0.238144	0	1.19072	0
Health Professions Sciences	Public Health	Full Professor	3	33.0484	22	0.394586	0	0.211649	0	1.0041	0
Health Professions Sciences	Public Health	Full Professor	5	49.4003	34	0.484824	0	0.337162	0	1.68827	1
Health Professions Sciences	Public Health	Full Professor	10	76.3273	55	0.868745	0	0.962264	0	3.22559	1
Health Professions Sciences	Speech and Hearing Sciences	Assistant Professor	3	7.54023	5.5	0.281609	0	0.045977	0	0.270115	0
Health Professions Sciences	Speech and Hearing Sciences	Assistant Professor	5	10.1897	8	0.321839	0	0.0517241	0	0.402299	0
Health Professions Sciences	Speech and Hearing Sciences	Assistant Professor	10	13.6782	11	0.5	0	0.114943	0	0.643678	0
Health Professions Sciences	Speech and Hearing Sciences	Associate Professor	3	7.98387	5	0.236559	0	0.0591398	0	0.290323	0
Health Professions Sciences	Speech and Hearing Sciences	Associate Professor	5	11.2688	8	0.311828	0	0.0913978	0	0.408602	0
Health Professions Sciences	Speech and Hearing Sciences	Associate Professor	10	17.0484	12.5	0.607527	0	0.150538	0	0.827957	0
Health Professions Sciences	Speech and Hearing Sciences	Full Professor	3	11.6286	8	0.428571	0	0.211429	0	0.76	0
Health Professions Sciences	Speech and Hearing Sciences	Full Professor	5	17.0686	12	0.582857	0	0.417143	0	1.19429	0
Health Professions Sciences	Speech and Hearing Sciences	Full Professor	10	27.9829	21	1.04	0	1	0	2.42857	1
Health Professions Sciences	Veterinary Medical Sciences	Assistant Professor	3	9.89941	8	0.12426	0	0.0147929	0	0.318047	0
Health Professions Sciences	Veterinary Medical Sciences	Assistant Professor	5	13.0932	10	0.12574	0	0.0177515	0	0.446746	0
Health Professions Sciences	Veterinary Medical Sciences	Assistant Professor	10	17.4556	15	0.171598	0	0.0266272	0	0.633136	0
Health Professions Sciences	Veterinary Medical Sciences	Associate Professor	3	12.4385	10	0.132492	0	0.0488959	0	0.574132	0
Health Professions Sciences	Veterinary Medical Sciences	Associate Professor	5	17.8927	14	0.15142	0	0.0646688	0	0.865931	0
Health Professions Sciences	Veterinary Medical Sciences	Associate Professor	10	27.2224	22	0.247634	0	0.148265	0	1.60095	0
Health Professions Sciences	Veterinary Medical Sciences	Full Professor	3	15.8552	12	0.208867	0	0.1133	0	0.8867	0
Health Professions Sciences	Veterinary Medical Sciences	Full Professor	5	24.1074	18	0.239409	0	0.185222	0	1.56256	0
Health Professions Sciences	Veterinary Medical Sciences	Full Professor	10	40.803	32	0.501478	0	0.48867	0	3.18818	1
Humanities	American Studies	Assistant Professor	3	1.81538	1	0.0615385	0	0.338462	0	0.692308	0
Humanities	American Studies	Assistant Professor	5	2.47692	2	0.0923077	0	0.384615	0	1.01538	0
Humanities	American Studies	Assistant Professor	10	3.13846	3	0.0923077	0	0.461538	0	1.46154	1
Humanities	American Studies	Associate Professor	3	1.85802	1	0.0555556	0	0.530864	0	1.2963	1
Humanities	American Studies	Associate Professor	5	2.96296	2	0.0740741	0	0.765432	1	1.95062	1
Humanities	American Studies	Associate Professor	10	4.54321	3	0.111111	0	1.57407	1	2.82716	2
Humanities	American Studies	Full Professor	3	1.71034	1	0.0344828	0	1.08276	1	2.35862	1
Humanities	American Studies	Full Professor	5	3.13103	2	0.0413793	0	1.57241	1	3.74483	3
Humanities	American Studies	Full Professor	10	6.03448	4	0.0758621	0	4.15862	3	6.58621	5
Humanities	Ancient Studies	Assistant Professor	3	2.05556	1	0.0277778	0	0.416667	0	0.638889	0
Humanities	Ancient Studies	Assistant Professor	5	2.80556	2	0.0277778	0	0.5	0	0.888889	0
Humanities	Ancient Studies	Assistant Professor	10	3.91667	3	0.0277778	0	0.722222	0	1.27778	0
Humanities	Ancient Studies	Associate Professor	3	1.63889	1	0	0	0.583333	0	1.11111	1
Humanities	Ancient Studies	Associate Professor	5	2.61111	3	0	0	1	1	2.05556	1.5
Humanities	Ancient Studies	Associate Professor	10	4.27778	4	0	0	1.97222	2	3.30556	3
Humanities	Ancient Studies	Full Professor	3	2.43077	1	0.0153846	0	1.58462	1	2.44615	2
Humanities	Ancient Studies	Full Professor	5	3.55385	2	0.0461538	0	2.81538	2	4.09231	3
Humanities	Ancient Studies	Full Professor	10	6.36923	3	0.0769231	0	7.63077	5	7.29231	5
Humanities	Area and Ethnic Studies, various	Assistant Professor	3	2.13681	1	0.00651466	0	0.273616	0	0.635179	0
Humanities	Area and Ethnic Studies, various	Assistant Professor	5	2.89902	2	0.00977199	0	0.322476	0	0.85342	0
Humanities	Area and Ethnic Studies, various	Assistant Professor	10	3.54723	2	0.0162866	0	0.442997	0	1.14007	0
Humanities	Area and Ethnic Studies, various	Associate Professor	3	2.04698	1	0.0151007	0	0.417785	0	1.13255	0
Humanities	Area and Ethnic Studies, various	Associate Professor	5	3.08893	2	0.0167785	0	0.659396	0	1.68289	1
Humanities	Area and Ethnic Studies, various	Associate Professor	10	4.93624	3	0.0251678	0	1.4245	1	2.64094	2
Humanities	Area and Ethnic Studies, various	Full Professor	3	2.97323	1	0.0251969	0	0.910236	0	2.51654	1
Humanities	Area and Ethnic Studies, various	Full Professor	5	4.78898	2	0.0346457	0	1.38268	1	3.87087	2
Humanities	Area and Ethnic Studies, various	Full Professor	10	8.03622	4	0.0535433	0	3.62205	3	6.93858	5
Humanities	Art History and Criticism	Assistant Professor	3	1.04974	0	0.0890052	0	0.240838	0	0.434555	0
Humanities	Art History and Criticism	Assistant Professor	5	1.4555	1	0.104712	0	0.295812	0	0.541885	0
Humanities	Art History and Criticism	Assistant Professor	10	1.79581	1	0.133508	0	0.45288	0	0.709424	0
Humanities	Art History and Criticism	Associate Professor	3	0.855683	0	0.0485313	0	0.330779	0	0.636015	0
Humanities	Art History and Criticism	Associate Professor	5	1.34227	0	0.0715198	0	0.505747	0	0.939974	0
Humanities	Art History and Criticism	Associate Professor	10	2.24393	1	0.12516	0	1.08046	0	1.53129	0
Humanities	Art History and Criticism	Full Professor	3	1.01926	0	0.03989	0	0.724897	0	1.18157	0
Humanities	Art History and Criticism	Full Professor	5	1.65062	0	0.0605227	0	1.14168	0	1.89959	1
Humanities	Art History and Criticism	Full Professor	10	2.98349	1	0.108666	0	3.14305	1	3.38927	1
Humanities	Asian Languages	Assistant Professor	3	1.8381	2	0.047619	0	0.285714	0	0.571429	0
Humanities	Asian Languages	Assistant Professor	5	2.44762	2	0.0857143	0	0.342857	0	0.704762	0
Humanities	Asian Languages	Assistant Professor	10	3.02857	2	0.0952381	0	0.447619	0	0.92381	0
Humanities	Asian Languages	Associate Professor	3	1.45622	1	0.00460829	0	0.506912	0	0.820276	0
Humanities	Asian Languages	Associate Professor	5	2.35945	2	0.0184332	0	0.764977	1	1.20737	1
Humanities	Asian Languages	Associate Professor	10	3.98157	3	0.0322581	0	1.67742	1	1.94931	1
Humanities	Asian Languages	Full Professor	3	2.02941	1	0.012605	0	0.92437	1	2.14286	1
Humanities	Asian Languages	Full Professor	5	3.17647	1	0.0294118	0	1.41597	1	3.46639	2
Humanities	Asian Languages	Full Professor	10	5.38655	3	0.0336134	0	3.79832	2	6.05462	4
Humanities	Asian Studies	Assistant Professor	3	2.01439	2	0	0	0.402878	0	0.669065	0
Humanities	Asian Studies	Assistant Professor	5	2.81295	2	0	0	0.47482	0	0.834532	0
Humanities	Asian Studies	Assistant Professor	10	3.41007	2	0	0	0.625899	0	1.06475	0
Humanities	Asian Studies	Associate Professor	3	1.58503	1	0.0306122	0	0.459184	0	0.894558	0
Humanities	Asian Studies	Associate Professor	5	2.58844	2	0.0544218	0	0.707483	0	1.41837	1
Humanities	Asian Studies	Associate Professor	10	4.43197	3	0.0714286	0	1.63605	1	2.23129	1
Humanities	Asian Studies	Full Professor	3	2.41581	1	0.04811	0	1.01375	1	2.31271	1
Humanities	Asian Studies	Full Professor	5	3.69759	2	0.0515464	0	1.48454	1	3.65636	2
Humanities	Asian Studies	Full Professor	10	6.1134	3	0.0687285	0	3.96564	3	6.31615	4
Humanities	Classics and Classical Languages	Assistant Professor	3	1.608	1	0.02	0	0.296	0	0.628	0
Humanities	Classics and Classical Languages	Assistant Professor	5	2.232	1	0.024	0	0.376	0	0.832	0
Humanities	Classics and Classical Languages	Assistant Professor	10	2.792	2	0.028	0	0.452	0	1.08	0
Humanities	Classics and Classical Languages	Associate Professor	3	1.15848	1	0.0111607	0	0.408482	0	0.973214	0
Humanities	Classics and Classical Languages	Associate Professor	5	1.82366	1	0.015625	0	0.618304	0	1.46652	1
Humanities	Classics and Classical Languages	Associate Professor	10	2.95536	2	0.0223214	0	1.33482	1	2.26562	1
Humanities	Classics and Classical Languages	Full Professor	3	1.71545	1	0.0203252	0	0.916667	1	2.02846	1
Humanities	Classics and Classical Languages	Full Professor	5	2.8313	2	0.0325203	0	1.4248	1	3.27846	2
Humanities	Classics and Classical Languages	Full Professor	10	5.00813	3	0.0609756	0	3.95122	3	5.67276	4
Humanities	Comparative Literature	Assistant Professor	3	1.54255	1	0	0	0.414894	0	0.691489	0
Humanities	Comparative Literature	Assistant Professor	5	2	1.5	0.0106383	0	0.521277	0	0.893617	0
Humanities	Comparative Literature	Assistant Professor	10	2.95745	2	0.0106383	0	0.659574	0	1.28723	0
Humanities	Comparative Literature	Associate Professor	3	1.46415	1	0.0113208	0	0.445283	0	1.13585	1
Humanities	Comparative Literature	Associate Professor	5	2.45283	2	0.0188679	0	0.690566	0	1.69434	1
Humanities	Comparative Literature	Associate Professor	10	4.15849	3	0.0188679	0	1.57736	1	2.82642	2
Humanities	Comparative Literature	Full Professor	3	1.85273	1	0.00475059	0	1.01663	1	2.42043	1
Humanities	Comparative Literature	Full Professor	5	3.04513	2	0.00712589	0	1.62708	1	3.88836	2
Humanities	Comparative Literature	Full Professor	10	5.52732	4	0.0118765	0	4.70546	3	7.03325	4
Humanities	Composition, Rhetoric and Writing	Assistant Professor	3	1.74766	1	0.280374	0	0.439252	0	0.728972	0
Humanities	Composition, Rhetoric and Writing	Assistant Professor	5	2.5514	1	0.392523	0	0.598131	0	0.990654	0
Humanities	Composition, Rhetoric and Writing	Assistant Professor	10	3.07477	2	0.476636	0	0.981308	0	1.42991	0
Humanities	Composition, Rhetoric and Writing	Associate Professor	3	1.17714	0	0.0742857	0	0.548571	0	1.25143	0
Humanities	Composition, Rhetoric and Writing	Associate Professor	5	1.93714	1	0.108571	0	0.782857	1	1.86286	1
Humanities	Composition, Rhetoric and Writing	Associate Professor	10	3.21143	2	0.194286	0	1.84	1	3.01714	2
Humanities	Composition, Rhetoric and Writing	Full Professor	3	1.57364	1	0.108527	0	1.05426	1	3.47674	1
Humanities	Composition, Rhetoric and Writing	Full Professor	5	2.60078	1	0.170543	0	1.61628	1	5.35271	2
Humanities	Composition, Rhetoric and Writing	Full Professor	10	4.45349	3	0.263566	0	4.68605	3	9.77132	4
Humanities	English Language and Literature	Assistant Professor	3	1.51827	1	0.0865385	0	0.378846	0	0.674038	0
Humanities	English Language and Literature	Assistant Professor	5	2.15385	1	0.106731	0	0.498077	0	0.894231	0
Humanities	English Language and Literature	Assistant Professor	10	2.81827	2	0.133654	0	0.735577	0	1.13846	0
Humanities	English Language and Literature	Associate Professor	3	1.23363	1	0.0376323	0	0.45198	0	1.10192	0
Humanities	English Language and Literature	Associate Professor	5	1.97962	1	0.0564485	0	0.669541	0	1.62132	1
Humanities	English Language and Literature	Associate Professor	10	3.38142	2	0.0787926	0	1.43042	1	2.50686	2
Humanities	English Language and Literature	Full Professor	3	1.59245	1	0.0274314	0	0.985394	1	2.14286	1
Humanities	English Language and Literature	Full Professor	5	2.6213	1	0.0470253	0	1.52903	1	3.39188	2
Humanities	English Language and Literature	Full Professor	10	4.72426	3	0.0890631	0	4.06733	3	6.00392	4
Humanities	French Language and Literature	Assistant Professor	3	1.66667	1	0	0	0.28125	0	0.510417	0
Humanities	French Language and Literature	Assistant Professor	5	2.39583	2	0.0208333	0	0.40625	0	0.645833	0
Humanities	French Language and Literature	Assistant Professor	10	3.15625	2.5	0.0208333	0	0.5	0	0.916667	0
Humanities	French Language and Literature	Associate Professor	3	1.63436	1	0.00440529	0	0.409692	0	0.753304	0
Humanities	French Language and Literature	Associate Professor	5	2.62555	2	0.00440529	0	0.621145	0	1.14978	1
Humanities	French Language and Literature	Associate Professor	10	4.3304	3	0.030837	0	1.42731	1	1.88987	1
Humanities	French Language and Literature	Full Professor	3	2.12355	1	0.023166	0	0.799228	0	1.40927	1
Humanities	French Language and Literature	Full Professor	5	3.46332	2	0.027027	0	1.20463	1	2.19305	1
Humanities	French Language and Literature	Full Professor	10	6.25097	4	0.030888	0	3.30502	2	3.7027	2
Humanities	Gender Studies	Assistant Professor	3	2.40678	2	0	0	0.381356	0	0.974576	0
Humanities	Gender Studies	Assistant Professor	5	3.40678	3	0.00847458	0	0.457627	0	1.27966	0
Humanities	Gender Studies	Assistant Professor	10	4.33051	4	0.00847458	0	0.584746	0	1.74576	1
Humanities	Gender Studies	Associate Professor	3	2.40078	1	0.0116732	0	0.490272	0	1.55253	1
Humanities	Gender Studies	Associate Professor	5	3.75875	2	0.0194553	0	0.731518	1	2.29572	2
Humanities	Gender Studies	Associate Professor	10	6.08171	4	0.0428016	0	1.4786	1	3.59922	3
Humanities	Gender Studies	Full Professor	3	3.10222	2	0.0177778	0	0.804444	1	2.69778	2
Humanities	Gender Studies	Full Professor	5	4.85778	3	0.0444444	0	1.25333	1	4.16444	3
Humanities	Gender Studies	Full Professor	10	8.29333	5	0.0577778	0	2.96444	2	7.16	5
Humanities	Germanic Languages and Literatures	Assistant Professor	3	1.93182	2	0	0	0.420455	0	0.420455	0
Humanities	Germanic Languages and Literatures	Assistant Professor	5	2.72727	2	0	0	0.568182	0	0.704545	0
Humanities	Germanic Languages and Literatures	Assistant Professor	10	3.56818	3	0	0	1.02273	0	0.931818	0
Humanities	Germanic Languages and Literatures	Associate Professor	3	1.68528	1	0	0	0.502538	0	0.939086	1
Humanities	Germanic Languages and Literatures	Associate Professor	5	2.67005	2	0.00507614	0	0.746193	0	1.44162	1
Humanities	Germanic Languages and Literatures	Associate Professor	10	4.35533	3	0.0101523	0	1.67513	1	2.32487	1
Humanities	Germanic Languages and Literatures	Full Professor	3	2.34016	1	0.00819672	0	1.15164	1	1.69672	1
Humanities	Germanic Languages and Literatures	Full Professor	5	3.79918	2	0.0122951	0	1.68443	1	2.84426	2
Humanities	Germanic Languages and Literatures	Full Professor	10	6.66803	5	0.0122951	0	4.12295	3	4.92213	3
Humanities	History	Assistant Professor	3	2.25905	1.5	0.0113122	0	0.330317	0	0.459276	0
Humanities	History	Assistant Professor	5	3.01923	2	0.0135747	0	0.391403	0	0.602941	0
Humanities	History	Assistant Professor	10	3.79751	3	0.0169683	0	0.495475	0	0.794118	0
Humanities	History	Associate Professor	3	2.1968	2	0.00888494	0	0.446468	0	0.860951	0
Humanities	History	Associate Professor	5	3.38561	3	0.0102177	0	0.718347	1	1.31186	1
Humanities	History	Associate Professor	10	5.50022	4	0.0164371	0	1.58818	1	2.08263	1
Humanities	History	Full Professor	3	2.8888	2	0.0117944	0	1.03833	1	1.71946	1
Humanities	History	Full Professor	5	4.63184	3	0.021904	0	1.5952	1	2.79865	2
Humanities	History	Full Professor	10	8.1727	6	0.0370682	0	4.24768	3	4.96083	3
Humanities	Humanities/Humanistic Studies, General	Assistant Professor	3	3.90256	2	0.169231	0	0.148718	0	0.333333	0
Humanities	Humanities/Humanistic Studies, General	Assistant Professor	5	5.30256	3	0.220513	0	0.189744	0	0.502564	0
Humanities	Humanities/Humanistic Studies, General	Assistant Professor	10	6.69744	4	0.251282	0	0.251282	0	0.661538	0
Humanities	Humanities/Humanistic Studies, General	Associate Professor	3	2.54815	1	0.0888889	0	0.355556	0	0.977778	0
Humanities	Humanities/Humanistic Studies, General	Associate Professor	5	4.08148	2	0.137037	0	0.574074	0	1.6	1
Humanities	Humanities/Humanistic Studies, General	Associate Professor	10	6.58519	3	0.166667	0	1.16667	1	2.64074	2
Humanities	Humanities/Humanistic Studies, General	Full Professor	3	4.32581	2	0.129032	0	0.725806	0	2.08387	1
Humanities	Humanities/Humanistic Studies, General	Full Professor	5	6.87097	3	0.190323	0	1.17097	1	3.26452	2
Humanities	Humanities/Humanistic Studies, General	Full Professor	10	11.5387	5	0.341935	0	3.13548	2	5.57097	4
Humanities	Italian Language and Literature	Assistant Professor	3	1.9863	2	0	0	0.260274	0	0.657534	0
Humanities	Italian Language and Literature	Assistant Professor	5	2.75342	2	0.0136986	0	0.315068	0	0.821918	0
Humanities	Italian Language and Literature	Assistant Professor	10	3.47945	3	0.0136986	0	0.452055	0	1.08219	1
Humanities	Italian Language and Literature	Associate Professor	3	1.73626	1	0	0	0.434066	0	0.807692	0
Humanities	Italian Language and Literature	Associate Professor	5	2.77473	2	0	0	0.703297	0	1.29121	1
Humanities	Italian Language and Literature	Associate Professor	10	4.48352	4	0.021978	0	1.55495	1	2.05495	1
Humanities	Italian Language and Literature	Full Professor	3	2.26633	1	0.0301508	0	0.824121	0	1.54774	1
Humanities	Italian Language and Literature	Full Professor	5	3.71859	2	0.0351759	0	1.34171	1	2.50251	2
Humanities	Italian Language and Literature	Full Professor	10	6.56281	4	0.0351759	0	3.41709	2	3.96482	3
Humanities	Languages, various	Assistant Professor	3	1.9684	1	0.0390335	0	0.204461	0	0.405204	0
Humanities	Languages, various	Assistant Professor	5	2.53903	2	0.0427509	0	0.258364	0	0.557621	0
Humanities	Languages, various	Assistant Professor	10	3.06691	2	0.0539033	0	0.386617	0	0.69145	0
Humanities	Languages, various	Associate Professor	3	1.29098	1	0.0188525	0	0.310656	0	0.686066	0
Humanities	Languages, various	Associate Professor	5	2.04262	1	0.0229508	0	0.465574	0	1.00738	0
Humanities	Languages, various	Associate Professor	10	3.35984	2	0.0295082	0	1.03525	1	1.4959	1
Humanities	Languages, various	Full Professor	3	1.87395	1	0.0168067	0	0.639856	0	1.16807	0
Humanities	Languages, various	Full Professor	5	2.91957	2	0.0240096	0	1.02281	1	1.84034	1
Humanities	Languages, various	Full Professor	10	4.85234	3	0.032413	0	2.66987	2	3.05162	1
Humanities	Linguistics	Assistant Professor	3	4.79781	4	0.819672	0	0.0874317	0	0.513661	0
Humanities	Linguistics	Assistant Professor	5	6.36612	5	1.10929	0	0.114754	0	0.743169	0
Humanities	Linguistics	Assistant Professor	10	7.87432	5	1.27322	0	0.180328	0	0.945355	0
Humanities	Linguistics	Associate Professor	3	3.64478	2	0.468657	0	0.277612	0	1.07164	0
Humanities	Linguistics	Associate Professor	5	5.44478	4	0.677612	0	0.456716	0	1.61493	1
Humanities	Linguistics	Associate Professor	10	8.74925	6	0.904478	0	0.883582	1	2.56119	2
Humanities	Linguistics	Full Professor	3	5.26411	3	1.2009	0	0.577878	0	2.14221	1
Humanities	Linguistics	Full Professor	5	8.15124	5	1.74266	0	0.900677	1	3.57562	2
Humanities	Linguistics	Full Professor	10	13.1783	8	2.25959	0	2.37246	2	6.73589	4
Humanities	Music specialties	Assistant Professor	3	0.730769	0	0	0	0.0576923	0	0.192308	0
Humanities	Music specialties	Assistant Professor	5	1	0	0	0	0.0769231	0	0.25	0
Humanities	Music specialties	Assistant Professor	10	1.26923	0	0	0	0.0769231	0	0.288462	0
Humanities	Music specialties	Associate Professor	3	0.535714	0	0	0	0.142857	0	0.348214	0
Humanities	Music specialties	Associate Professor	5	0.901786	0	0	0	0.205357	0	0.482143	0
Humanities	Music specialties	Associate Professor	10	1.50893	0	0	0	0.464286	0	0.75	0
Humanities	Music specialties	Full Professor	3	0.63354	0	0.00621118	0	0.291925	0	0.409938	0
Humanities	Music specialties	Full Professor	5	1.02484	0	0.00621118	0	0.385093	0	0.639752	0
Humanities	Music specialties	Full Professor	10	1.71429	0	0.124224	0	0.987578	0	1.1118	0
Humanities	Music, General	Assistant Professor	3	0.816011	0	0.0477528	0	0.0898876	0	0.172753	0
Humanities	Music, General	Assistant Professor	5	1.09551	0	0.0575843	0	0.123596	0	0.214888	0
Humanities	Music, General	Assistant Professor	10	1.44382	0	0.0912921	0	0.196629	0	0.279494	0
Humanities	Music, General	Associate Professor	3	0.547775	0	0.0255288	0	0.150985	0	0.309263	0
Humanities	Music, General	Associate Professor	5	0.883297	0	0.0371991	0	0.215901	0	0.479942	0
Humanities	Music, General	Associate Professor	10	1.46973	0	0.055434	0	0.439825	0	0.695113	0
Humanities	Music, General	Full Professor	3	0.40578	0	0.0508671	0	0.208092	0	0.378613	0
Humanities	Music, General	Full Professor	5	0.687861	0	0.0705202	0	0.319075	0	0.597688	0
Humanities	Music, General	Full Professor	10	1.25318	0	0.121965	0	0.882659	0	1.03931	0
Humanities	Near and Middle Eastern Languages and Cultures	Assistant Professor	3	2.11905	2	0.047619	0	0.297619	0	0.666667	0
Humanities	Near and Middle Eastern Languages and Cultures	Assistant Professor	5	2.54762	2	0.0952381	0	0.392857	0	0.77381	0
Humanities	Near and Middle Eastern Languages and Cultures	Assistant Professor	10	3.30952	2.5	0.130952	0	0.511905	0	1.09524	0
Humanities	Near and Middle Eastern Languages and Cultures	Associate Professor	3	1.97006	1	0.00598802	0	0.479042	0	1.32335	1
Humanities	Near and Middle Eastern Languages and Cultures	Associate Professor	5	3.08383	2	0.011976	0	0.790419	1	2.07784	1
Humanities	Near and Middle Eastern Languages and Cultures	Associate Professor	10	5.21557	4	0.011976	0	2.05389	2	3.49102	3
Humanities	Near and Middle Eastern Languages and Cultures	Full Professor	3	2.2161	1	0.00847458	0	1.11441	1	2.33475	2
Humanities	Near and Middle Eastern Languages and Cultures	Full Professor	5	3.55085	2	0.0338983	0	1.67797	1	3.64407	3
Humanities	Near and Middle Eastern Languages and Cultures	Full Professor	10	5.9661	4	0.0508475	0	4.68644	3	6.80932	5
Humanities	Performing and Visual Arts, various	Assistant Professor	3	0.61236	0	0.0955056	0	0.0979133	0	0.254414	0
Humanities	Performing and Visual Arts, various	Assistant Professor	5	0.853933	0	0.116372	0	0.122793	0	0.334671	0
Humanities	Performing and Visual Arts, various	Assistant Professor	10	1.10594	0	0.151685	0	0.17496	0	0.413323	0
Humanities	Performing and Visual Arts, various	Associate Professor	3	0.471011	0	0.075328	0	0.169276	0	0.352518	0
Humanities	Performing and Visual Arts, various	Associate Professor	5	0.744816	0	0.105375	0	0.251375	0	0.542531	0
Humanities	Performing and Visual Arts, various	Associate Professor	10	1.24333	0	0.166314	0	0.513331	0	0.876428	0
Humanities	Performing and Visual Arts, various	Full Professor	3	0.773253	0	0.0782045	0	0.332254	0	0.637668	0
Humanities	Performing and Visual Arts, various	Full Professor	5	1.21703	0	0.118001	0	0.492365	0	1.02082	0
Humanities	Performing and Visual Arts, various	Full Professor	10	2.04627	0	0.219806	0	1.3776	0	1.80009	0
Humanities	Philosophy	Assistant Professor	3	3.75676	3	0.0521236	0	0.202703	0	0.855212	0
Humanities	Philosophy	Assistant Professor	5	4.99614	4	0.0694981	0	0.256757	0	1.10232	0
Humanities	Philosophy	Assistant Professor	10	6.0888	4	0.0810811	0	0.339768	0	1.27027	0
Humanities	Philosophy	Associate Professor	3	2.59497	2	0.0411899	0	0.384439	0	1.41076	1
Humanities	Philosophy	Associate Professor	5	4.17963	3	0.0491991	0	0.576659	0	2.12128	1
Humanities	Philosophy	Associate Professor	10	6.85698	5	0.0709382	0	1.13158	1	3.04005	2
Humanities	Philosophy	Full Professor	3	3.71882	2	0.0686347	0	0.973432	1	3.5262	2
Humanities	Philosophy	Full Professor	5	5.93948	4	0.123985	0	1.49151	1	5.42731	4
Humanities	Philosophy	Full Professor	10	10.5166	7	0.23321	0	4.0524	2	9.6738	6
Humanities	Religion/Religious Studies	Assistant Professor	3	2.14741	2	0	0	0.406375	0	0.876494	0
Humanities	Religion/Religious Studies	Assistant Professor	5	3.00398	2	0	0	0.521912	0	1.13147	0
Humanities	Religion/Religious Studies	Assistant Professor	10	3.89641	3	0.00398406	0	0.605578	0	1.39442	0
Humanities	Religion/Religious Studies	Associate Professor	3	1.86248	1	0.00982318	0	0.520629	0	1.40472	1
Humanities	Religion/Religious Studies	Associate Professor	5	3.01179	2	0.0117878	0	0.805501	1	2.15324	1
Humanities	Religion/Religious Studies	Associate Professor	10	4.90766	4	0.0117878	0	1.76031	1	3.36149	2
Humanities	Religion/Religious Studies	Full Professor	3	2.728	1	0.0016	0	1.1296	1	2.6752	2
Humanities	Religion/Religious Studies	Full Professor	5	4.2352	2	0.0032	0	1.736	1	4.3408	3
Humanities	Religion/Religious Studies	Full Professor	10	7.4544	4	0.0064	0	4.8128	3	7.7392	6
Humanities	Slavic Languages and Literatures	Assistant Professor	3	1.7875	1.5	0.0625	0	0.5	0	0.6	0
Humanities	Slavic Languages and Literatures	Assistant Professor	5	2.425	2	0.075	0	0.6375	0	0.7875	0
Humanities	Slavic Languages and Literatures	Assistant Professor	10	3.2125	2	0.0875	0	0.9875	0	1.025	0
Humanities	Slavic Languages and Literatures	Associate Professor	3	1.64943	1	0.0114943	0	0.522989	0	1.02874	0
Humanities	Slavic Languages and Literatures	Associate Professor	5	2.52874	2	0.0229885	0	0.747126	0	1.47126	1
Humanities	Slavic Languages and Literatures	Associate Professor	10	4.16667	3	0.0344828	0	1.77586	1	2.16667	1
Humanities	Slavic Languages and Literatures	Full Professor	3	3.0407	1	0.0697674	0	1.02326	1	1.83721	1
Humanities	Slavic Languages and Literatures	Full Professor	5	4.87791	3	0.0755814	0	1.60465	1	2.92442	2
Humanities	Slavic Languages and Literatures	Full Professor	10	8.12791	4	0.122093	0	4.13953	3	4.77907	3
Humanities	Spanish Language and Literature	Assistant Professor	3	2.56115	2	0.028777	0	0.194245	0	0.453237	0
Humanities	Spanish Language and Literature	Assistant Professor	5	3.3741	3	0.0503597	0	0.280576	0	0.561151	0
Humanities	Spanish Language and Literature	Assistant Professor	10	4.15827	3	0.0503597	0	0.374101	0	0.769784	0
Humanities	Spanish Language and Literature	Associate Professor	3	1.84211	1	0.0105263	0	0.442105	0	0.765789	0
Humanities	Spanish Language and Literature	Associate Professor	5	2.88684	2	0.0184211	0	0.707895	0	1.13947	0.5
Humanities	Spanish Language and Literature	Associate Professor	10	4.61053	3	0.0289474	0	1.55	1	1.76316	1
Humanities	Spanish Language and Literature	Full Professor	3	2.31445	1	0.0368272	0	0.74221	0	1.47875	1
Humanities	Spanish Language and Literature	Full Professor	5	3.72521	2	0.0481586	0	1.14448	1	2.31445	1
Humanities	Spanish Language and Literature	Full Professor	10	6.32295	4	0.0481586	0	3.1898	2	3.71388	2
Humanities	Theatre Literature, History and Criticism	Assistant Professor	3	0.73913	0	0.0197628	0	0.0988142	0	0.3083	0
Humanities	Theatre Literature, History and Criticism	Assistant Professor	5	1.05929	0	0.0197628	0	0.13834	0	0.434783	0
Humanities	Theatre Literature, History and Criticism	Assistant Professor	10	1.41502	0	0.0197628	0	0.185771	0	0.56917	0
Humanities	Theatre Literature, History and Criticism	Associate Professor	3	0.418546	0	0.0526316	0	0.155388	0	0.333333	0
Humanities	Theatre Literature, History and Criticism	Associate Professor	5	0.714286	0	0.0601504	0	0.230576	0	0.621554	0
Humanities	Theatre Literature, History and Criticism	Associate Professor	10	1.26817	0	0.0877193	0	0.468672	0	0.97995	0
Humanities	Theatre Literature, History and Criticism	Full Professor	3	0.55774	0	0.00737101	0	0.292383	0	0.511057	0
Humanities	Theatre Literature, History and Criticism	Full Professor	5	0.97543	0	0.00737101	0	0.469287	0	0.960688	0
Humanities	Theatre Literature, History and Criticism	Full Professor	10	1.64373	0	0.012285	0	1.3317	0	1.62654	0
Humanities	Theology/Theological Studies	Assistant Professor	3	1.28846	0	0.00480769	0	0.423077	0	0.735577	0
Humanities	Theology/Theological Studies	Assistant Professor	5	1.80769	0	0.00480769	0	0.576923	0	1.05288	0
Humanities	Theology/Theological Studies	Assistant Professor	10	2.29327	1	0.00480769	0	0.798077	0	1.35577	0
Humanities	Theology/Theological Studies	Associate Professor	3	1.80624	0	0.00222717	0	0.732739	0	1.50557	1
Humanities	Theology/Theological Studies	Associate Professor	5	2.83742	1	0.00445434	0	1.05122	1	2.2049	1
Humanities	Theology/Theological Studies	Associate Professor	10	4.61024	2	0.00445434	0	2.28953	1	3.31403	2
Humanities	Theology/Theological Studies	Full Professor	3	1.99713	0	0.00429799	0	1.30086	1	2.50143	1
Humanities	Theology/Theological Studies	Full Professor	5	2.9957	1	0.00429799	0	1.98424	1	3.87106	2
Humanities	Theology/Theological Studies	Full Professor	10	4.92693	2	0.00573066	0	4.97135	3	6.69484	4
Natural Resources and Conservation	Environmental Sciences	Assistant Professor	3	10.4905	8	1.27841	0	0.0397727	0	0.263258	0
Natural Resources and Conservation	Environmental Sciences	Assistant Professor	5	14.1136	12	1.33712	0	0.0587121	0	0.369318	0
Natural Resources and Conservation	Environmental Sciences	Assistant Professor	10	18.6477	15	1.44886	0	0.0909091	0	0.522727	0
Natural Resources and Conservation	Environmental Sciences	Associate Professor	3	11.1909	8	1.39641	0	0.127243	0	0.404568	0
Natural Resources and Conservation	Environmental Sciences	Associate Professor	5	16.106	12	1.55139	0	0.168026	0	0.683524	0
Natural Resources and Conservation	Environmental Sciences	Associate Professor	10	23.6101	19	1.89723	0	0.344209	0	1.14029	0
Natural Resources and Conservation	Environmental Sciences	Full Professor	3	18.3665	12	1.67115	0	0.184588	0	0.746416	0
Natural Resources and Conservation	Environmental Sciences	Full Professor	5	27.1111	18	1.90233	0	0.295699	0	1.2724	0
Natural Resources and Conservation	Environmental Sciences	Full Professor	10	42.7428	29	2.46864	0	0.851254	0	2.34229	1
Natural Resources and Conservation	Fisheries Science	Assistant Professor	3	12.3962	10	0.0566038	0	0.0188679	0	0.216981	0
Natural Resources and Conservation	Fisheries Science	Assistant Professor	5	17.0943	14	0.0943396	0	0.0283019	0	0.264151	0
Natural Resources and Conservation	Fisheries Science	Assistant Professor	10	22.4057	19	0.132075	0	0.0943396	0	0.415094	0
Natural Resources and Conservation	Fisheries Science	Associate Professor	3	13.9339	11	0.0991736	0	0.0413223	0	0.280992	0
Natural Resources and Conservation	Fisheries Science	Associate Professor	5	19.6198	17	0.115702	0	0.0495868	0	0.438017	0
Natural Resources and Conservation	Fisheries Science	Associate Professor	10	29.157	27	0.132231	0	0.0991736	0	0.793388	0
Natural Resources and Conservation	Fisheries Science	Full Professor	3	18.5187	14	0.149533	0	0.168224	0	0.658879	0
Natural Resources and Conservation	Fisheries Science	Full Professor	5	26.9159	23	0.205607	0	0.228972	0	0.990654	0
Natural Resources and Conservation	Fisheries Science	Full Professor	10	42.3972	35.5	0.345794	0	0.560748	0	1.54673	1
Natural Resources and Conservation	Forest Resources/Forestry	Assistant Professor	3	10.0614	8	0.285088	0	0.0350877	0	0.25	0
Natural Resources and Conservation	Forest Resources/Forestry	Assistant Professor	5	13.4693	12	0.350877	0	0.0482456	0	0.311404	0
Natural Resources and Conservation	Forest Resources/Forestry	Assistant Professor	10	17.4781	14.5	0.447368	0	0.0789474	0	0.451754	0
Natural Resources and Conservation	Forest Resources/Forestry	Associate Professor	3	13.7402	10	0.191176	0	0.0735294	0	0.352941	0
Natural Resources and Conservation	Forest Resources/Forestry	Associate Professor	5	18.9853	15	0.240196	0	0.102941	0	0.534314	0
Natural Resources and Conservation	Forest Resources/Forestry	Associate Professor	10	26.9804	22	0.426471	0	0.205882	0	0.911765	0
Natural Resources and Conservation	Forest Resources/Forestry	Full Professor	3	16.1324	12	0.166667	0	0.115196	0	0.522059	0
Natural Resources and Conservation	Forest Resources/Forestry	Full Professor	5	23.8578	18	0.254902	0	0.171569	0	0.85049	0
Natural Resources and Conservation	Forest Resources/Forestry	Full Professor	10	36.598	30	0.485294	0	0.52451	0	1.625	0
Natural Resources and Conservation	Natural Resources	Assistant Professor	3	10.7757	9	0.314642	0	0.0311526	0	0.280374	0
Natural Resources and Conservation	Natural Resources	Assistant Professor	5	14.4112	12	0.370717	0	0.046729	0	0.4081	0
Natural Resources and Conservation	Natural Resources	Assistant Professor	10	18.704	16	0.429907	0	0.0778816	0	0.598131	0
Natural Resources and Conservation	Natural Resources	Associate Professor	3	13.648	11	0.319079	0	0.121711	0	0.539474	0
Natural Resources and Conservation	Natural Resources	Associate Professor	5	19.227	15	0.351974	0	0.157895	0	0.888158	0
Natural Resources and Conservation	Natural Resources	Associate Professor	10	27.0921	24	0.519737	0	0.368421	0	1.50329	0
Natural Resources and Conservation	Natural Resources	Full Professor	3	16.0389	12	0.513514	0	0.204392	0	0.726351	0
Natural Resources and Conservation	Natural Resources	Full Professor	5	23.7416	19	0.675676	0	0.29223	0	1.26014	0
Natural Resources and Conservation	Natural Resources	Full Professor	10	37.1166	30	1.11993	0	0.85473	0	2.54392	1
Natural Resources and Conservation	Wildlife Science	Assistant Professor	3	14.3048	11	0.0666667	0	0.0380952	0	0.27619	0
Natural Resources and Conservation	Wildlife Science	Assistant Professor	5	19.8667	16	0.0761905	0	0.047619	0	0.419048	0
Natural Resources and Conservation	Wildlife Science	Assistant Professor	10	25.8286	22	0.0857143	0	0.0761905	0	0.580952	0
Natural Resources and Conservation	Wildlife Science	Associate Professor	3	15.8036	13	0.142857	0	0.0267857	0	0.258929	0
Natural Resources and Conservation	Wildlife Science	Associate Professor	5	21.9554	19	0.151786	0	0.0446429	0	0.482143	0
Natural Resources and Conservation	Wildlife Science	Associate Professor	10	31.7946	28	0.178571	0	0.0892857	0	0.955357	0
Natural Resources and Conservation	Wildlife Science	Full Professor	3	18.5263	15	0.140351	0	0.201754	0	0.868421	0
Natural Resources and Conservation	Wildlife Science	Full Professor	5	26.9561	23	0.210526	0	0.267544	0	1.3114	0
Natural Resources and Conservation	Wildlife Science	Full Professor	10	42.3289	37	0.289474	0	0.679825	0	2.0614	1
Physical and Mathematical Sciences	Applied Mathematics	Assistant Professor	3	8.36364	7	1.60909	0	0.0181818	0	0.127273	0
Physical and Mathematical Sciences	Applied Mathematics	Assistant Professor	5	11.3091	10	2.13636	0	0.0181818	0	0.227273	0
Physical and Mathematical Sciences	Applied Mathematics	Assistant Professor	10	15.0545	14	3.20909	0.5	0.0272727	0	0.372727	0
Physical and Mathematical Sciences	Applied Mathematics	Associate Professor	3	8.75	6	1.01163	0	0.0930233	0	0.203488	0
Physical and Mathematical Sciences	Applied Mathematics	Associate Professor	5	12.7965	9	1.48256	0	0.122093	0	0.354651	0
Physical and Mathematical Sciences	Applied Mathematics	Associate Professor	10	20.1919	14	2.43605	1	0.267442	0	0.686047	0
Physical and Mathematical Sciences	Applied Mathematics	Full Professor	3	12.8378	8	2.81982	0	0.189189	0	0.261261	0
Physical and Mathematical Sciences	Applied Mathematics	Full Professor	5	19.3664	13	4.38138	0	0.3003	0	0.675676	0
Physical and Mathematical Sciences	Applied Mathematics	Full Professor	10	32.4805	23	7.95796	1	1.05706	0	2.00601	0
Physical and Mathematical Sciences	Applied Physics	Assistant Professor	3	10.5155	9	5.37113	2	0.0309278	0	0.103093	0
Physical and Mathematical Sciences	Applied Physics	Assistant Professor	5	14.3505	13	7.25773	3	0.0309278	0	0.123711	0
Physical and Mathematical Sciences	Applied Physics	Assistant Professor	10	21.2784	19	10.9278	4	0.0721649	0	0.319588	0
Physical and Mathematical Sciences	Applied Physics	Associate Professor	3	16.48	11	8.16	2	0.0666667	0	0.133333	0
Physical and Mathematical Sciences	Applied Physics	Associate Professor	5	23.6	16	11.4667	3	0.106667	0	0.24	0
Physical and Mathematical Sciences	Applied Physics	Associate Professor	10	35.96	27	17.8533	5	0.173333	0	0.546667	0
Physical and Mathematical Sciences	Applied Physics	Full Professor	3	24.7	15	10.8036	3.5	0.182143	0	0.396429	0
Physical and Mathematical Sciences	Applied Physics	Full Professor	5	37.1643	23.5	16.5714	6	0.289286	0	0.646429	0
Physical and Mathematical Sciences	Applied Physics	Full Professor	10	61.9857	43.5	28.775	11	0.892857	0	1.35714	0
Physical and Mathematical Sciences	Astronomy and Astrophysics	Assistant Professor	3	32.9622	15	2.67331	1	0.0258964	0	0.0976096	0
Physical and Mathematical Sciences	Astronomy and Astrophysics	Assistant Professor	5	44.6355	21	3.75896	1	0.0298805	0	0.141434	0
Physical and Mathematical Sciences	Astronomy and Astrophysics	Assistant Professor	10	62.3924	32	5.4741	2	0.059761	0	0.268924	0
Physical and Mathematical Sciences	Astronomy and Astrophysics	Associate Professor	3	39.7637	13	1.88658	0	0.0226843	0	0.132325	0
Physical and Mathematical Sciences	Astronomy and Astrophysics	Associate Professor	5	55.8185	19	2.75992	1	0.0359168	0	0.189036	0
Physical and Mathematical Sciences	Astronomy and Astrophysics	Associate Professor	10	85.465	30	4.68998	2	0.170132	0	0.425331	0
Physical and Mathematical Sciences	Astronomy and Astrophysics	Full Professor	3	46.2097	17	2.63772	1	0.110422	0	0.187345	0
Physical and Mathematical Sciences	Astronomy and Astrophysics	Full Professor	5	66.9361	26.5	3.96774	1	0.182382	0	0.30397	0
Physical and Mathematical Sciences	Astronomy and Astrophysics	Full Professor	10	108.816	46	7.3263	3	0.625931	0	0.818859	0
Physical and Mathematical Sciences	Atmospheric Sciences and Meteorology	Assistant Professor	3	11.1962	9	1.80861	0	0.0143541	0	0.129187	0
Physical and Mathematical Sciences	Atmospheric Sciences and Meteorology	Assistant Professor	5	15.2823	12	1.97129	0	0.0287081	0	0.186603	0
Physical and Mathematical Sciences	Atmospheric Sciences and Meteorology	Assistant Professor	10	20.1722	16	2.15789	0	0.0574163	0	0.287081	0
Physical and Mathematical Sciences	Atmospheric Sciences and Meteorology	Associate Professor	3	15.4385	12	1.66393	0	0.045082	0	0.217213	0
Physical and Mathematical Sciences	Atmospheric Sciences and Meteorology	Associate Professor	5	22.1885	18	1.88525	0	0.0655738	0	0.331967	0
Physical and Mathematical Sciences	Atmospheric Sciences and Meteorology	Associate Professor	10	32.2951	26.5	2.5	1	0.114754	0	0.602459	0
Physical and Mathematical Sciences	Atmospheric Sciences and Meteorology	Full Professor	3	22.435	17	2.36788	0	0.128467	0	0.411679	0
Physical and Mathematical Sciences	Atmospheric Sciences and Meteorology	Full Professor	5	33.5182	25	2.86569	0	0.186861	0	0.59854	0
Physical and Mathematical Sciences	Atmospheric Sciences and Meteorology	Full Professor	10	53.2321	40	3.96496	1	0.563504	0	1.1781	0
Physical and Mathematical Sciences	Biostatistics	Assistant Professor	3	19.6684	14	0.748663	0	0.026738	0	0.165775	0
Physical and Mathematical Sciences	Biostatistics	Assistant Professor	5	25.623	20	0.882353	0	0.0320856	0	0.251337	0
Physical and Mathematical Sciences	Biostatistics	Assistant Professor	10	31.7888	25	1.1631	0	0.0347594	0	0.347594	0
Physical and Mathematical Sciences	Biostatistics	Associate Professor	3	34.592	27	0.955224	0	0.0422886	0	0.221393	0
Physical and Mathematical Sciences	Biostatistics	Associate Professor	5	49.5174	39	1.14677	0	0.0547264	0	0.350746	0
Physical and Mathematical Sciences	Biostatistics	Associate Professor	10	69.893	57	1.62438	0	0.154229	0	0.706468	0
Physical and Mathematical Sciences	Biostatistics	Full Professor	3	46.4034	37.5	1.10847	0	0.194915	0	0.60339	0
Physical and Mathematical Sciences	Biostatistics	Full Professor	5	68.8458	54	1.35085	0	0.279661	0	0.894915	0
Physical and Mathematical Sciences	Biostatistics	Full Professor	10	107.358	85.5	2.47288	1	0.744068	0	1.68983	1
Physical and Mathematical Sciences	Chemical Sciences, various	Assistant Professor	3	11.9268	8.5	0.731707	0	0.0243902	0	0.0853659	0
Physical and Mathematical Sciences	Chemical Sciences, various	Assistant Professor	5	16.6829	13	1.13415	0	0.0243902	0	0.146341	0
Physical and Mathematical Sciences	Chemical Sciences, various	Assistant Professor	10	22.7683	18.5	1.42683	0	0.0243902	0	0.353659	0
Physical and Mathematical Sciences	Chemical Sciences, various	Associate Professor	3	10.9878	6.5	0.45122	0	0.0243902	0	0.243902	0
Physical and Mathematical Sciences	Chemical Sciences, various	Associate Professor	5	15.8659	11.5	0.646341	0	0.0609756	0	0.365854	0
Physical and Mathematical Sciences	Chemical Sciences, various	Associate Professor	10	25.0488	19.5	0.926829	0	0.195122	0	0.780488	0
Physical and Mathematical Sciences	Chemical Sciences, various	Full Professor	3	23.7546	15	0.583333	0	0.0833333	0	0.453704	0
Physical and Mathematical Sciences	Chemical Sciences, various	Full Professor	5	36.0833	22	0.837963	0	0.148148	0	0.824074	0
Physical and Mathematical Sciences	Chemical Sciences, various	Full Professor	10	59.7731	40	1.35648	0	0.634259	0	1.80093	1
Physical and Mathematical Sciences	Chemistry	Assistant Professor	3	11.3284	9	0.351724	0	0.0163793	0	0.152586	0
Physical and Mathematical Sciences	Chemistry	Assistant Professor	5	16.1466	13	0.47069	0	0.0215517	0	0.24569	0
Physical and Mathematical Sciences	Chemistry	Assistant Professor	10	23.0716	19	0.65431	0	0.0353448	0	0.407759	0
Physical and Mathematical Sciences	Chemistry	Associate Professor	3	12.2006	9	0.379567	0	0.043997	0	0.231916	0
Physical and Mathematical Sciences	Chemistry	Associate Professor	5	17.513	13	0.513796	0	0.0618941	0	0.378822	0
Physical and Mathematical Sciences	Chemistry	Associate Professor	10	26.4609	21	0.746458	0	0.15138	0	0.650261	0
Physical and Mathematical Sciences	Chemistry	Full Professor	3	24.0666	16	0.746202	0	0.139157	0	0.451657	0
Physical and Mathematical Sciences	Chemistry	Full Professor	5	36.5998	24	1.10463	0	0.225483	0	0.815608	0
Physical and Mathematical Sciences	Chemistry	Full Professor	10	60.7338	42	1.93577	0	0.696823	0	1.59185	1
Physical and Mathematical Sciences	Computational Sciences	Assistant Professor	3	8.94444	7	4.57778	1.5	0.0111111	0	0.255556	0
Physical and Mathematical Sciences	Computational Sciences	Assistant Professor	5	12.1222	10.5	6.71111	2	0.0333333	0	0.366667	0
Physical and Mathematical Sciences	Computational Sciences	Assistant Professor	10	15.4111	12.5	9.53333	3	0.0555556	0	0.744444	0
Physical and Mathematical Sciences	Computational Sciences	Associate Professor	3	7.7973	3	6.35135	2	0.148649	0	0.445946	0
Physical and Mathematical Sciences	Computational Sciences	Associate Professor	5	10.9189	6	8.7027	2	0.175676	0	0.689189	0
Physical and Mathematical Sciences	Computational Sciences	Associate Professor	10	15.7432	9	13.0541	5.5	0.337838	0	1.32432	0
Physical and Mathematical Sciences	Computational Sciences	Full Professor	3	10.6038	7	6.85849	2.5	0.132075	0	0.518868	0
Physical and Mathematical Sciences	Computational Sciences	Full Professor	5	15.6698	11	11.2925	6	0.198113	0	0.924528	0
Physical and Mathematical Sciences	Computational Sciences	Full Professor	10	26.5472	20	19.8302	10.5	0.792453	0	1.91509	0
Physical and Mathematical Sciences	Computer and Information Sciences, various	Assistant Professor	3	5.44805	4	4.75974	1	0.0714286	0	0.363636	0
Physical and Mathematical Sciences	Computer and Information Sciences, various	Assistant Professor	5	7.1039	5	6.64935	3	0.116883	0	0.519481	0
Physical and Mathematical Sciences	Computer and Information Sciences, various	Assistant Professor	10	8.8961	6	9.37662	6	0.155844	0	0.876623	0
Physical and Mathematical Sciences	Computer and Information Sciences, various	Associate Professor	3	5.70175	4	4.45029	1	0.157895	0	0.497076	0
Physical and Mathematical Sciences	Computer and Information Sciences, various	Associate Professor	5	8.49123	6	6.32164	1	0.222222	0	0.80117	0
Physical and Mathematical Sciences	Computer and Information Sciences, various	Associate Professor	10	12.6842	10	10.1579	3	0.491228	0	1.54971	0
Physical and Mathematical Sciences	Computer and Information Sciences, various	Full Professor	3	9.29775	4	9.27528	2	0.252809	0	0.589888	0
Physical and Mathematical Sciences	Computer and Information Sciences, various	Full Professor	5	13.7303	6	14.6011	3	0.404494	0	1.10674	0
Physical and Mathematical Sciences	Computer and Information Sciences, various	Full Professor	10	22.2584	10.5	25.7865	7	1.53933	0	2.45506	1
Physical and Mathematical Sciences	Computer Science	Assistant Professor	3	5.22414	4	9.52184	7	0.0557471	0	0.240805	0
Physical and Mathematical Sciences	Computer Science	Assistant Professor	5	6.98218	5	13.0144	11	0.0833333	0	0.413218	0
Physical and Mathematical Sciences	Computer Science	Assistant Professor	10	8.87989	6	17.2828	14	0.116092	0	0.807471	0
Physical and Mathematical Sciences	Computer Science	Associate Professor	3	6.17454	3	9.37139	6	0.0853018	0	0.318898	0
Physical and Mathematical Sciences	Computer Science	Associate Professor	5	8.94816	5	13.8648	9	0.127297	0	0.608268	0
Physical and Mathematical Sciences	Computer Science	Associate Professor	10	13.4547	9	21.5217	15	0.349081	0	1.50328	0
Physical and Mathematical Sciences	Computer Science	Full Professor	3	8.81408	5	11.2504	7	0.185563	0	0.556338	0
Physical and Mathematical Sciences	Computer Science	Full Professor	5	13.3838	8	17.5074	12	0.282042	0	1.03239	0
Physical and Mathematical Sciences	Computer Science	Full Professor	10	22.1796	14	30.8944	22	1.23556	0	2.78944	1
Physical and Mathematical Sciences	Geology/Earth Science, General	Assistant Professor	3	10.5657	9	4.05179	2	0.0239044	0	0.151394	0
Physical and Mathematical Sciences	Geology/Earth Science, General	Assistant Professor	5	14.4608	12	4.28818	2	0.0345286	0	0.209827	0
Physical and Mathematical Sciences	Geology/Earth Science, General	Assistant Professor	10	19.0863	16	4.54316	2	0.0531208	0	0.298805	0
Physical and Mathematical Sciences	Geology/Earth Science, General	Associate Professor	3	11.6386	9	4.83808	2	0.0414508	0	0.186528	0
Physical and Mathematical Sciences	Geology/Earth Science, General	Associate Professor	5	16.8938	14	5.15285	2	0.0621762	0	0.32513	0
Physical and Mathematical Sciences	Geology/Earth Science, General	Associate Professor	10	24.6399	20.5	5.71503	3	0.142487	0	0.568653	0
Physical and Mathematical Sciences	Geology/Earth Science, General	Full Professor	3	17.7469	13	5.7294	2	0.1391	0	0.371712	0
Physical and Mathematical Sciences	Geology/Earth Science, General	Full Professor	5	26.4448	20	6.1841	3	0.215079	0	0.617183	0
Physical and Mathematical Sciences	Geology/Earth Science, General	Full Professor	10	41.7271	31	7.07189	3	0.632963	0	1.22268	0
Physical and Mathematical Sciences	Geophysics	Assistant Professor	3	11.6076	9	5.4557	4	0.0253165	0	0.0759494	0
Physical and Mathematical Sciences	Geophysics	Assistant Professor	5	15.6709	12	5.96203	4	0.0379747	0	0.139241	0
Physical and Mathematical Sciences	Geophysics	Assistant Professor	10	20.3544	17	6.83544	4	0.0632911	0	0.227848	0
Physical and Mathematical Sciences	Geophysics	Associate Professor	3	11.65	10	5.23333	3.5	0.0166667	0	0.25	0
Physical and Mathematical Sciences	Geophysics	Associate Professor	5	16.5333	14	5.65	4	0.0833333	0	0.3	0
Physical and Mathematical Sciences	Geophysics	Associate Professor	10	25.7	24	6.56667	4	0.15	0	0.483333	0
Physical and Mathematical Sciences	Geophysics	Full Professor	3	16.6324	14	6.39459	4	0.102703	0	0.302703	0
Physical and Mathematical Sciences	Geophysics	Full Professor	5	25.0486	20	7.64865	4	0.189189	0	0.583784	0
Physical and Mathematical Sciences	Geophysics	Full Professor	10	39.373	31	9.77838	4	0.664865	0	1.03784	0
Physical and Mathematical Sciences	Information Science/Studies	Assistant Professor	3	6.54795	5	6.15342	3	0.106849	0	0.484932	0
Physical and Mathematical Sciences	Information Science/Studies	Assistant Professor	5	8.49315	6	8.24384	4	0.161644	0	0.70411	0
Physical and Mathematical Sciences	Information Science/Studies	Assistant Professor	10	10.2603	8	11.1205	7	0.224658	0	1.12603	0
Physical and Mathematical Sciences	Information Science/Studies	Associate Professor	3	6.63038	4	5.03544	1	0.179747	0	0.637975	0
Physical and Mathematical Sciences	Information Science/Studies	Associate Professor	5	9.59747	6	7.51646	2	0.275949	0	0.96962	0
Physical and Mathematical Sciences	Information Science/Studies	Associate Professor	10	14.1241	10	12.162	5	0.577215	0	1.92405	0
Physical and Mathematical Sciences	Information Science/Studies	Full Professor	3	8.43049	5	6.53139	2	0.35426	0	0.852018	0
Physical and Mathematical Sciences	Information Science/Studies	Full Professor	5	12.4507	7	10.1547	3	0.549327	0	1.47085	0
Physical and Mathematical Sciences	Information Science/Studies	Full Professor	10	19.7825	12	17.9798	8	1.62108	1	3.25336	2
Physical and Mathematical Sciences	Information Technology/Information Systems	Assistant Professor	3	4.94864	3	4.09063	1	0.0483384	0	0.223565	0
Physical and Mathematical Sciences	Information Technology/Information Systems	Assistant Professor	5	6.34441	4	5.45317	1	0.0664653	0	0.344411	0
Physical and Mathematical Sciences	Information Technology/Information Systems	Assistant Professor	10	7.67069	5	7.33233	2	0.0966767	0	0.625378	0
Physical and Mathematical Sciences	Information Technology/Information Systems	Associate Professor	3	7.01869	3	3.82243	1	0.149533	0	0.358255	0
Physical and Mathematical Sciences	Information Technology/Information Systems	Associate Professor	5	9.57321	5	5.41433	1	0.205607	0	0.58567	0
Physical and Mathematical Sciences	Information Technology/Information Systems	Associate Professor	10	13.9065	7	8.15265	2	0.420561	0	1.19626	0
Physical and Mathematical Sciences	Information Technology/Information Systems	Full Professor	3	7.88472	4	4.10992	1	0.372654	0	0.627346	0
Physical and Mathematical Sciences	Information Technology/Information Systems	Full Professor	5	12.0912	7	6.51475	1	0.573727	0	1.10188	0
Physical and Mathematical Sciences	Information Technology/Information Systems	Full Professor	10	20.0697	12	11.252	2	1.67828	0	2.3941	0
Physical and Mathematical Sciences	Marine Sciences	Assistant Professor	3	10.4157	8	0.752941	0	0.027451	0	0.215686	0
Physical and Mathematical Sciences	Marine Sciences	Assistant Professor	5	14.2118	12	0.827451	0	0.0392157	0	0.317647	0
Physical and Mathematical Sciences	Marine Sciences	Assistant Professor	10	19.2235	16	0.972549	0	0.0784314	0	0.435294	0
Physical and Mathematical Sciences	Marine Sciences	Associate Professor	3	13.6389	11	1.03571	0	0.0436508	0	0.349206	0
Physical and Mathematical Sciences	Marine Sciences	Associate Professor	5	19.5635	16	1.19841	0	0.0793651	0	0.547619	0
Physical and Mathematical Sciences	Marine Sciences	Associate Professor	10	28.7143	24.5	1.61508	0	0.150794	0	0.789683	0
Physical and Mathematical Sciences	Marine Sciences	Full Professor	3	18.7373	15	1.05538	0	0.0901899	0	0.515823	0
Physical and Mathematical Sciences	Marine Sciences	Full Professor	5	27.9778	22.5	1.38291	0	0.131329	0	0.75	0
Physical and Mathematical Sciences	Marine Sciences	Full Professor	10	44.8718	36	2.18038	0	0.425633	0	1.37816	1
Physical and Mathematical Sciences	Mathematics	Assistant Professor	3	6.35303	5	0.572046	0	0.0439481	0	0.103026	0
Physical and Mathematical Sciences	Mathematics	Assistant Professor	5	8.72478	7	0.822767	0	0.0554755	0	0.176513	0
Physical and Mathematical Sciences	Mathematics	Assistant Professor	10	11.0591	9	1.15994	0	0.073487	0	0.28098	0
Physical and Mathematical Sciences	Mathematics	Associate Professor	3	5.12968	3	0.555043	0	0.0853026	0	0.150432	0
Physical and Mathematical Sciences	Mathematics	Associate Professor	5	7.61095	6	0.855331	0	0.117579	0	0.255331	0
Physical and Mathematical Sciences	Mathematics	Associate Professor	10	11.8986	9	1.39769	0	0.228818	0	0.484726	0
Physical and Mathematical Sciences	Mathematics	Full Professor	3	8.01401	5	0.771282	0	0.247306	0	0.270744	0
Physical and Mathematical Sciences	Mathematics	Full Professor	5	12.0404	8	1.21686	0	0.379041	0	0.491918	0
Physical and Mathematical Sciences	Mathematics	Full Professor	10	19.8516	14	2.2139	0	1.17942	0	1.17511	0
Physical and Mathematical Sciences	Oceanography, Physical Sciences	Assistant Professor	3	10.5405	9	0.831081	0	0.0202703	0	0.202703	0
Physical and Mathematical Sciences	Oceanography, Physical Sciences	Assistant Professor	5	14.4865	12	1.06081	0	0.027027	0	0.277027	0
Physical and Mathematical Sciences	Oceanography, Physical Sciences	Assistant Professor	10	19.3784	16	1.26351	0	0.0675676	0	0.378378	0
Physical and Mathematical Sciences	Oceanography, Physical Sciences	Associate Professor	3	14.766	12	1.29078	0	0.0851064	0	0.304965	0
Physical and Mathematical Sciences	Oceanography, Physical Sciences	Associate Professor	5	20.9929	17	1.65248	0	0.113475	0	0.546099	0
Physical and Mathematical Sciences	Oceanography, Physical Sciences	Associate Professor	10	30.9716	25	2.60993	0	0.205674	0	0.921986	0
Physical and Mathematical Sciences	Oceanography, Physical Sciences	Full Professor	3	19.1987	16	1.08609	0	0.0993377	0	0.419426	0
Physical and Mathematical Sciences	Oceanography, Physical Sciences	Full Professor	5	28.7682	23	1.49007	0	0.15011	0	0.607064	0
Physical and Mathematical Sciences	Oceanography, Physical Sciences	Full Professor	10	46.6932	38	2.55188	1	0.520971	0	1.13024	0
Physical and Mathematical Sciences	Physics, General	Assistant Professor	3	36.0512	13	2.04854	0	0.0194175	0	0.111209	0
Physical and Mathematical Sciences	Physics, General	Assistant Professor	5	50.0415	19	2.99382	1	0.0247132	0	0.202118	0
Physical and Mathematical Sciences	Physics, General	Assistant Professor	10	71.6787	27	4.57811	1	0.0494263	0	0.372462	0
Physical and Mathematical Sciences	Physics, General	Associate Professor	3	35.7226	10.5	1.69476	0	0.0335516	0	0.123568	0
Physical and Mathematical Sciences	Physics, General	Associate Professor	5	50.9926	15	2.55237	1	0.0499182	0	0.189034	0
Physical and Mathematical Sciences	Physics, General	Associate Professor	10	78.847	26	4.68658	1	0.146481	0	0.396072	0
Physical and Mathematical Sciences	Physics, General	Full Professor	3	47.6167	14	2.3509	0	0.102836	0	0.196505	0
Physical and Mathematical Sciences	Physics, General	Full Professor	5	69.1025	22	3.63535	1	0.16872	0	0.348897	0
Physical and Mathematical Sciences	Physics, General	Full Professor	10	111.112	39	6.86938	2	0.540819	0	0.804641	0
Physical and Mathematical Sciences	Statistics	Assistant Professor	3	6.88872	6	0.775915	0	0.0228659	0	0.0762195	0
Physical and Mathematical Sciences	Statistics	Assistant Professor	5	9.07317	7	1.05335	0	0.0320122	0	0.134146	0
Physical and Mathematical Sciences	Statistics	Assistant Professor	10	11.1189	9	1.40549	0	0.0472561	0	0.221037	0
Physical and Mathematical Sciences	Statistics	Associate Professor	3	7.13714	5	0.624286	0	0.0942857	0	0.161429	0
Physical and Mathematical Sciences	Statistics	Associate Professor	5	10.4643	8	0.958571	0	0.127143	0	0.294286	0
Physical and Mathematical Sciences	Statistics	Associate Professor	10	15.9986	13	1.61143	0	0.231429	0	0.541429	0
Physical and Mathematical Sciences	Statistics	Full Professor	3	11.3863	7	0.795171	0	0.248127	0	0.348876	0
Physical and Mathematical Sciences	Statistics	Full Professor	5	17.3139	11	1.23897	0	0.373855	0	0.611157	0
Physical and Mathematical Sciences	Statistics	Full Professor	10	28.8251	19	2.33139	0	1.10491	0	1.29725	0
Social and Behavioral Sciences	Anthropology	Assistant Professor	3	5.52848	4	0.0727848	0	0.261076	0	0.863924	0
Social and Behavioral Sciences	Anthropology	Assistant Professor	5	7.47152	5	0.0870253	0	0.333861	0	1.14873	0
Social and Behavioral Sciences	Anthropology	Assistant Professor	10	9.52848	7	0.096519	0	0.443038	0	1.53006	1
Social and Behavioral Sciences	Anthropology	Associate Professor	3	4.4248	3	0.109375	0	0.305664	0	1.1582	1
Social and Behavioral Sciences	Anthropology	Associate Professor	5	6.52148	4	0.119141	0	0.483398	0	1.81836	1
Social and Behavioral Sciences	Anthropology	Associate Professor	10	10.0996	7	0.128906	0	1.04199	1	2.94141	2
Social and Behavioral Sciences	Anthropology	Full Professor	3	5.91035	3	0.144254	0	0.703341	0	2.23716	1
Social and Behavioral Sciences	Anthropology	Full Professor	5	8.95192	5	0.167889	0	1.08476	1	3.62836	2
Social and Behavioral Sciences	Anthropology	Full Professor	10	14.4988	9	0.225754	0	2.99022	2	6.56153	5
Social and Behavioral Sciences	Applied Economics	Assistant Professor	3	4.68116	4	0.130435	0	0.0144928	0	0.115942	0
Social and Behavioral Sciences	Applied Economics	Assistant Professor	5	5.94203	5	0.173913	0	0.0289855	0	0.362319	0
Social and Behavioral Sciences	Applied Economics	Assistant Professor	10	7.4058	5	0.217391	0	0.0724638	0	0.405797	0
Social and Behavioral Sciences	Applied Economics	Associate Professor	3	5.89888	5	0.0674157	0	0.0561798	0	0.337079	0
Social and Behavioral Sciences	Applied Economics	Associate Professor	5	8.73034	7	0.134831	0	0.0674157	0	0.651685	0
Social and Behavioral Sciences	Applied Economics	Associate Professor	10	13.764	11	0.224719	0	0.11236	0	0.932584	0
Social and Behavioral Sciences	Applied Economics	Full Professor	3	9.47222	7	0.284722	0	0.305556	0	1.15278	0
Social and Behavioral Sciences	Applied Economics	Full Professor	5	14.3264	10	0.423611	0	0.513889	0	2.11806	1
Social and Behavioral Sciences	Applied Economics	Full Professor	10	24.3333	18	0.666667	0	1.42361	0	3.70833	1
Social and Behavioral Sciences	Clinical Psychology	Assistant Professor	3	12.6933	11	0.08	0	0.04	0	0.52	0
Social and Behavioral Sciences	Clinical Psychology	Assistant Professor	5	17.3867	16	0.08	0	0.0533333	0	0.986667	0
Social and Behavioral Sciences	Clinical Psychology	Assistant Professor	10	22.7467	21	0.0933333	0	0.0533333	0	1.42667	0
Social and Behavioral Sciences	Clinical Psychology	Associate Professor	3	11.4407	8.5	0.118644	0	0.161017	0	0.898305	0
Social and Behavioral Sciences	Clinical Psychology	Associate Professor	5	16.6525	13	0.127119	0	0.177966	0	1.35593	1
Social and Behavioral Sciences	Clinical Psychology	Associate Professor	10	25.0763	21	0.20339	0	0.271186	0	2.27966	1
Social and Behavioral Sciences	Clinical Psychology	Full Professor	3	18.2155	14	0.138122	0	0.370166	0	2.06077	1
Social and Behavioral Sciences	Clinical Psychology	Full Professor	5	28.2762	23	0.198895	0	0.607735	0	3.47514	2
Social and Behavioral Sciences	Clinical Psychology	Full Professor	10	45.8287	35	0.40884	0	1.50276	0	6.31492	4
Social and Behavioral Sciences	Counseling Psychology	Assistant Professor	3	7.88889	6	0.00584795	0	0.0818713	0	0.660819	0
Social and Behavioral Sciences	Counseling Psychology	Assistant Professor	5	10.1871	8	0.0467836	0	0.111111	0	0.959064	0
Social and Behavioral Sciences	Counseling Psychology	Assistant Professor	10	12.3275	9	0.0584795	0	0.128655	0	1.25731	0
Social and Behavioral Sciences	Counseling Psychology	Associate Professor	3	8.21635	5	0.0528846	0	0.211538	0	1.09615	0
Social and Behavioral Sciences	Counseling Psychology	Associate Professor	5	11.851	7.5	0.0721154	0	0.302885	0	1.71635	1
Social and Behavioral Sciences	Counseling Psychology	Associate Professor	10	17.2404	12	0.110577	0	0.5625	0	2.75	2
Social and Behavioral Sciences	Counseling Psychology	Full Professor	3	8.9098	6	0.109804	0	0.509804	0	2.01569	1
Social and Behavioral Sciences	Counseling Psychology	Full Professor	5	13.3255	9	0.160784	0	0.752941	0	3.06275	2
Social and Behavioral Sciences	Counseling Psychology	Full Professor	10	21.4471	16	0.247059	0	1.76078	1	5.55294	4
Social and Behavioral Sciences	Criminal Justice and Criminology	Assistant Professor	3	7.70336	6	0.0948012	0	0.171254	0	0.776758	0
Social and Behavioral Sciences	Criminal Justice and Criminology	Assistant Professor	5	9.61468	8	0.12844	0	0.229358	0	1.07034	0
Social and Behavioral Sciences	Criminal Justice and Criminology	Assistant Professor	10	11.0948	9	0.159021	0	0.272171	0	1.29969	0
Social and Behavioral Sciences	Criminal Justice and Criminology	Associate Professor	3	5.65289	4	0.046832	0	0.242424	0	1.06887	0
Social and Behavioral Sciences	Criminal Justice and Criminology	Associate Professor	5	8.40496	6	0.0550964	0	0.349862	0	1.58953	1
Social and Behavioral Sciences	Criminal Justice and Criminology	Associate Professor	10	12.5978	9	0.0826446	0	0.705234	0	2.30579	1
Social and Behavioral Sciences	Criminal Justice and Criminology	Full Professor	3	7.73441	5	0.0415704	0	0.903002	0	2.25635	1
Social and Behavioral Sciences	Criminal Justice and Criminology	Full Professor	5	11.3788	8	0.0484988	0	1.36952	1	3.77136	2
Social and Behavioral Sciences	Criminal Justice and Criminology	Full Professor	10	18.7506	14	0.0669746	0	3.54042	2	6.903	4
Social and Behavioral Sciences	Economics, General	Assistant Professor	3	3.35755	2	0.0532688	0	0.023406	0	0.0936239	0
Social and Behavioral Sciences	Economics, General	Assistant Professor	5	4.33898	3	0.071025	0	0.031477	0	0.154157	0
Social and Behavioral Sciences	Economics, General	Assistant Professor	10	5.33818	4	0.0960452	0	0.0443906	0	0.218725	0
Social and Behavioral Sciences	Economics, General	Associate Professor	3	4.37658	3	0.072973	0	0.0720721	0	0.269369	0
Social and Behavioral Sciences	Economics, General	Associate Professor	5	6.86937	5	0.118919	0	0.105405	0	0.442342	0
Social and Behavioral Sciences	Economics, General	Associate Professor	10	11.073	9	0.187387	0	0.199099	0	0.738739	0
Social and Behavioral Sciences	Economics, General	Full Professor	3	6.60943	4	0.0606626	0	0.371909	0	1.14372	0
Social and Behavioral Sciences	Economics, General	Full Professor	5	10.4204	7	0.0942604	0	0.589827	0	2.03126	1
Social and Behavioral Sciences	Economics, General	Full Professor	10	18.2371	13	0.157723	0	1.70135	0	4.09939	2
Social and Behavioral Sciences	Educational Psychology	Assistant Professor	3	7.84112	6	0.242991	0	0.0747664	0	0.70405	0
Social and Behavioral Sciences	Educational Psychology	Assistant Professor	5	10.0966	7	0.364486	0	0.115265	0	0.950156	0
Social and Behavioral Sciences	Educational Psychology	Assistant Professor	10	12.0218	8	0.423676	0	0.133956	0	1.20872	0
Social and Behavioral Sciences	Educational Psychology	Associate Professor	3	7.34254	6	0.176796	0	0.198895	0	1.15746	1
Social and Behavioral Sciences	Educational Psychology	Associate Professor	5	10.732	8	0.259669	0	0.31768	0	1.83425	1
Social and Behavioral Sciences	Educational Psychology	Associate Professor	10	15.6271	13	0.417127	0	0.566298	0	2.96409	2
Social and Behavioral Sciences	Educational Psychology	Full Professor	3	9.26846	6	0.255034	0	0.57047	0	1.9821	1
Social and Behavioral Sciences	Educational Psychology	Full Professor	5	13.736	9	0.35123	0	0.883669	0	3.16555	2
Social and Behavioral Sciences	Educational Psychology	Full Professor	10	21.9911	16	0.527964	0	2.02237	1	5.51902	4
Social and Behavioral Sciences	Geography	Assistant Professor	3	8.70153	7	0.668367	0	0.102041	0	0.492347	0
Social and Behavioral Sciences	Geography	Assistant Professor	5	11.6862	9.5	0.734694	0	0.132653	0	0.673469	0
Social and Behavioral Sciences	Geography	Assistant Professor	10	14.7117	12	0.971939	0	0.163265	0	0.951531	0
Social and Behavioral Sciences	Geography	Associate Professor	3	7.86508	5	0.623016	0	0.22619	0	0.801587	0
Social and Behavioral Sciences	Geography	Associate Professor	5	11.4821	8	0.708333	0	0.305556	0	1.12103	0
Social and Behavioral Sciences	Geography	Associate Professor	10	17.1369	13	0.924603	0	0.515873	0	1.75198	1
Social and Behavioral Sciences	Geography	Full Professor	3	12.6183	8	1.17035	0	0.477918	0	1.60568	1
Social and Behavioral Sciences	Geography	Full Professor	5	18.7476	13	1.38328	0	0.712934	0	2.60883	1
Social and Behavioral Sciences	Geography	Full Professor	10	29.2776	20.5	1.92902	0	1.88644	1	4.39905	2
Social and Behavioral Sciences	International Affairs and Development	Assistant Professor	3	4.23607	3	0.209836	0	0.265574	0	0.6	0
Social and Behavioral Sciences	International Affairs and Development	Assistant Professor	5	5.56393	4	0.265574	0	0.347541	0	0.793443	0
Social and Behavioral Sciences	International Affairs and Development	Assistant Professor	10	6.97377	5	0.314754	0	0.436066	0	1.03279	0
Social and Behavioral Sciences	International Affairs and Development	Associate Professor	3	3.75938	2	0.147903	0	0.483444	0	1.22958	0
Social and Behavioral Sciences	International Affairs and Development	Associate Professor	5	5.66225	4	0.200883	0	0.741722	0	1.98013	1
Social and Behavioral Sciences	International Affairs and Development	Associate Professor	10	8.90287	7	0.264901	0	1.5298	1	3.16556	2
Social and Behavioral Sciences	International Affairs and Development	Full Professor	3	4.75373	3	0.126866	0	1.07463	1	2.69254	1
Social and Behavioral Sciences	International Affairs and Development	Full Professor	5	7.47164	4	0.192537	0	1.63731	1	4.45224	3
Social and Behavioral Sciences	International Affairs and Development	Full Professor	10	13.009	8	0.271642	0	4.38209	3	8.73284	5
Social and Behavioral Sciences	Political Science	Assistant Professor	3	4.36013	3	0.0428725	0	0.270096	0	0.442658	0
Social and Behavioral Sciences	Political Science	Assistant Professor	5	5.58842	4	0.0546624	0	0.315113	0	0.547696	0
Social and Behavioral Sciences	Political Science	Assistant Professor	10	6.57556	5	0.0643087	0	0.380493	0	0.709539	0
Social and Behavioral Sciences	Political Science	Associate Professor	3	3.80316	3	0.0323276	0	0.382184	0	0.912356	0
Social and Behavioral Sciences	Political Science	Associate Professor	5	5.68175	4	0.0445402	0	0.582615	0	1.42529	1
Social and Behavioral Sciences	Political Science	Associate Professor	10	8.69828	7	0.0560345	0	1.14943	1	2.25287	1
Social and Behavioral Sciences	Political Science	Full Professor	3	4.91216	3	0.0771195	0	0.928498	1	2.08938	1
Social and Behavioral Sciences	Political Science	Full Professor	5	7.53524	5	0.102656	0	1.40041	1	3.41624	2
Social and Behavioral Sciences	Political Science	Full Professor	10	12.5082	8	0.146578	0	3.73902	3	6.56282	4
Social and Behavioral Sciences	Psychology, General	Assistant Professor	3	11.4908	9	0.254608	0	0.0293515	0	0.583618	0
Social and Behavioral Sciences	Psychology, General	Assistant Professor	5	15.8143	13	0.339249	0	0.0423208	0	0.871672	0
Social and Behavioral Sciences	Psychology, General	Assistant Professor	10	20.901	17	0.421843	0	0.0641638	0	1.28669	1
Social and Behavioral Sciences	Psychology, General	Associate Professor	3	10.6998	8	0.262685	0	0.127378	0	0.81871	0
Social and Behavioral Sciences	Psychology, General	Associate Professor	5	15.5264	11	0.361522	0	0.172833	0	1.30127	0
Social and Behavioral Sciences	Psychology, General	Associate Professor	10	23.3827	18	0.542283	0	0.330338	0	2.24524	1
Social and Behavioral Sciences	Psychology, General	Full Professor	3	17.1164	11	0.411129	0	0.393005	0	1.91924	1
Social and Behavioral Sciences	Psychology, General	Full Professor	5	25.7421	18	0.628935	0	0.607949	0	3.29253	2
Social and Behavioral Sciences	Psychology, General	Full Professor	10	41.1975	30	1.01844	0	1.62417	1	6.12305	3
Social and Behavioral Sciences	Psychology, various	Assistant Professor	3	10.2479	9	0.17094	0	0.034188	0	0.444444	0
Social and Behavioral Sciences	Psychology, various	Assistant Professor	5	13.7778	11	0.196581	0	0.0512821	0	0.803419	0
Social and Behavioral Sciences	Psychology, various	Assistant Professor	10	17.7863	15	0.264957	0	0.0854701	0	1.23077	0
Social and Behavioral Sciences	Psychology, various	Associate Professor	3	11.1925	8	0.106952	0	0.144385	0	0.855615	0
Social and Behavioral Sciences	Psychology, various	Associate Professor	5	16.3957	12	0.144385	0	0.176471	0	1.25134	0
Social and Behavioral Sciences	Psychology, various	Associate Professor	10	24.6845	19	0.251337	0	0.40107	0	2.36898	1
Social and Behavioral Sciences	Psychology, various	Full Professor	3	16.9923	11	0.235521	0	0.382239	0	1.74903	1
Social and Behavioral Sciences	Psychology, various	Full Professor	5	26.1853	17	0.34749	0	0.579151	0	3.01158	2
Social and Behavioral Sciences	Psychology, various	Full Professor	10	41.6293	29	0.687259	0	1.64479	1	5.53668	3
Social and Behavioral Sciences	Public Administration	Assistant Professor	3	5.68182	4	0.230519	0	0.12013	0	0.493506	0
Social and Behavioral Sciences	Public Administration	Assistant Professor	5	7.07143	5	0.347403	0	0.165584	0	0.616883	0
Social and Behavioral Sciences	Public Administration	Assistant Professor	10	8.35714	6	0.409091	0	0.214286	0	0.775974	0
Social and Behavioral Sciences	Public Administration	Associate Professor	3	5.30693	3	0.425743	0	0.368812	0	0.898515	0
Social and Behavioral Sciences	Public Administration	Associate Professor	5	7.80446	5.5	0.59901	0	0.50495	0	1.35396	1
Social and Behavioral Sciences	Public Administration	Associate Professor	10	12.005	9	0.908416	0	0.913366	0	2.26485	1
Social and Behavioral Sciences	Public Administration	Full Professor	3	6.53372	4	0.16763	0	0.743738	0	1.95761	1
Social and Behavioral Sciences	Public Administration	Full Professor	5	9.93256	6	0.289017	0	1.21002	0	3.36031	2
Social and Behavioral Sciences	Public Administration	Full Professor	10	16.5992	11	0.414258	0	3.19268	2	6.60308	4
Social and Behavioral Sciences	Public Policy	Assistant Professor	3	5.88861	4	0.311392	0	0.0911392	0	0.41519	0
Social and Behavioral Sciences	Public Policy	Assistant Professor	5	7.47848	5	0.455696	0	0.121519	0	0.541772	0
Social and Behavioral Sciences	Public Policy	Assistant Professor	10	9.16709	6	0.589873	0	0.156962	0	0.749367	0
Social and Behavioral Sciences	Public Policy	Associate Professor	3	6.46988	4	0.39759	0	0.283133	0	0.861446	0
Social and Behavioral Sciences	Public Policy	Associate Professor	5	9.54418	6	0.574297	0	0.407631	0	1.3012	1
Social and Behavioral Sciences	Public Policy	Associate Professor	10	14.4779	11	0.861446	0	0.827309	0	2.16064	1
Social and Behavioral Sciences	Public Policy	Full Professor	3	9.00337	5	0.276404	0	0.768539	0	2.09326	1
Social and Behavioral Sciences	Public Policy	Full Professor	5	13.7022	8	0.423596	0	1.15843	0	3.61348	2
Social and Behavioral Sciences	Public Policy	Full Professor	10	22.5079	14	0.64382	0	3.16517	2	7.28652	4
Social and Behavioral Sciences	School Psychology	Assistant Professor	3	8.37255	7	0.127451	0	0.0686275	0	0.627451	0
Social and Behavioral Sciences	School Psychology	Assistant Professor	5	10.4608	9	0.22549	0	0.0784314	0	0.901961	0
Social and Behavioral Sciences	School Psychology	Assistant Professor	10	12.2255	10	0.264706	0	0.0882353	0	1.10784	0
Social and Behavioral Sciences	School Psychology	Associate Professor	3	8.54015	6	0.109489	0	0.233577	0	1.0146	0
Social and Behavioral Sciences	School Psychology	Associate Professor	5	12.2847	9	0.153285	0	0.306569	0	1.55474	1
Social and Behavioral Sciences	School Psychology	Associate Professor	10	17.6569	13	0.189781	0	0.642336	0	2.79562	2
Social and Behavioral Sciences	School Psychology	Full Professor	3	11.6325	10	0.271084	0	0.385542	0	1.95181	1
Social and Behavioral Sciences	School Psychology	Full Professor	5	17.1747	15	0.481928	0	0.590361	0	3.00602	2
Social and Behavioral Sciences	School Psychology	Full Professor	10	27.1024	25	0.644578	0	1.46988	1	5.72289	4
Social and Behavioral Sciences	Social Sciences, various	Assistant Professor	3	5.77596	4	0.579235	0	0.185792	0	0.551913	0
Social and Behavioral Sciences	Social Sciences, various	Assistant Professor	5	7.55191	5	0.704918	0	0.234973	0	0.797814	0
Social and Behavioral Sciences	Social Sciences, various	Assistant Professor	10	9.61749	6	0.836066	0	0.26776	0	1.08743	0
Social and Behavioral Sciences	Social Sciences, various	Associate Professor	3	5.38865	2	0.414847	0	0.266376	0	1.06987	0
Social and Behavioral Sciences	Social Sciences, various	Associate Professor	5	8.21834	4	0.628821	0	0.445415	0	1.69869	1
Social and Behavioral Sciences	Social Sciences, various	Associate Professor	10	12.3668	7	1.0262	0	0.864629	0	2.62445	2
Social and Behavioral Sciences	Social Sciences, various	Full Professor	3	5.95185	2.5	0.251852	0	0.562963	0	1.83333	1
Social and Behavioral Sciences	Social Sciences, various	Full Professor	5	9.55185	4	0.477778	0	0.9	0	3.08148	2
Social and Behavioral Sciences	Social Sciences, various	Full Professor	10	16.5259	8	0.888889	0	2.61111	1	5.90741	4
Social and Behavioral Sciences	Social Work/Social Welfare	Assistant Professor	3	7.90754	6	0.0412518	0	0.0483642	0	0.421053	0
Social and Behavioral Sciences	Social Work/Social Welfare	Assistant Professor	5	9.87198	7	0.0554765	0	0.0697013	0	0.587482	0
Social and Behavioral Sciences	Social Work/Social Welfare	Assistant Professor	10	11.4737	8	0.0711238	0	0.0881935	0	0.765292	0
Social and Behavioral Sciences	Social Work/Social Welfare	Associate Professor	3	7.85229	5	0.0574443	0	0.146542	0	0.686987	0
Social and Behavioral Sciences	Social Work/Social Welfare	Associate Professor	5	11.374	8	0.0656506	0	0.203986	0	1.09613	0
Social and Behavioral Sciences	Social Work/Social Welfare	Associate Professor	10	16.7386	13	0.0797186	0	0.409144	0	1.76553	1
Social and Behavioral Sciences	Social Work/Social Welfare	Full Professor	3	9.75813	5	0.049505	0	0.479491	0	1.4017	1
Social and Behavioral Sciences	Social Work/Social Welfare	Full Professor	5	14.2659	8	0.0579915	0	0.759547	0	2.48373	1
Social and Behavioral Sciences	Social Work/Social Welfare	Full Professor	10	22.8133	14	0.0735502	0	2.00566	1	4.2942	3
Social and Behavioral Sciences	Sociology	Assistant Professor	3	5.69202	5	0.0773006	0	0.226994	0	0.748466	0
Social and Behavioral Sciences	Sociology	Assistant Professor	5	7.34601	6	0.0957055	0	0.271166	0	1.00736	0
Social and Behavioral Sciences	Sociology	Assistant Professor	10	8.88466	7	0.125153	0	0.337423	0	1.34479	0
Social and Behavioral Sciences	Sociology	Associate Professor	3	4.39099	3	0.0612613	0	0.266667	0	1.09099	0
Social and Behavioral Sciences	Sociology	Associate Professor	5	6.55946	5	0.0756757	0	0.416216	0	1.64505	1
Social and Behavioral Sciences	Sociology	Associate Professor	10	10.1423	8	0.106306	0	0.848649	0	2.62613	2
Social and Behavioral Sciences	Sociology	Full Professor	3	6.97546	4	0.126108	0	0.727335	0	2.27744	1
Social and Behavioral Sciences	Sociology	Full Professor	5	10.4213	7	0.172461	0	1.1077	1	3.83095	2
Social and Behavioral Sciences	Sociology	Full Professor	10	16.7914	11	0.244035	0	2.86639	2	6.94683	4
